# Supplementary material for: An integrative pan cancer analysis of RET aberrations and their potential clinical implications
Source: Sci Rep. 2022 Aug 17;12:13913. doi: 10.1038/s41598-022-17791-y (PMC9386015; doi:10.1038/s41598-022-17791-y)
Supplement: Supplementary file 3 — Supplementary Table 2. [file 41598_2022_17791_MOESM3_ESM.xlsx]

## Sheet: table
Study	Sample ID	Cancer Type	Protein Change	Annotation	Functional Impact	Mutation Type	Variant Type	Copy #	COSMIC	MS	VS	Center	Chromosome	Start Pos	End Pos	Ref	Var	HGVSg	HGVSc	Allele Freq (T)	Allele Freq (N)	Variant Reads	Ref Reads	Variant Reads (Normal)	Ref Reads (Normal)	# Mut in Sample	Exon	gnomAD	ClinVar ID	dbSNP
Thyroid Carcinoma (TCGA, PanCancer Atlas)	TCGA-BJ-A0ZJ-01	Papillary Thyroid Cancer	CCDC6-RET	OncoKB: Oncogenic, level_1;CIViC: Predictive: 2;MyCancerGenome: not present;CancerHotspot: no;3DHotspot: no	MutationAssessor: NA;SIFT: NA;Polyphen-2: NA	Fusion	NA	diploid		NA	NA	WashU	NA	-1	-1	NA										1
Thyroid Carcinoma (TCGA, PanCancer Atlas)	TCGA-BJ-A28Z-01	Papillary Thyroid Cancer	CCDC6-RET	OncoKB: Oncogenic, level_1;CIViC: Predictive: 2;MyCancerGenome: not present;CancerHotspot: no;3DHotspot: no	MutationAssessor: NA;SIFT: NA;Polyphen-2: NA	Fusion	NA	diploid		NA	NA	WashU	NA	-1	-1	NA										15
Thyroid Carcinoma (TCGA, PanCancer Atlas)	TCGA-CE-A13K-01	Papillary Thyroid Cancer	CCDC6-RET	OncoKB: Oncogenic, level_1;CIViC: Predictive: 2;MyCancerGenome: not present;CancerHotspot: no;3DHotspot: no	MutationAssessor: NA;SIFT: NA;Polyphen-2: NA	Fusion	NA	diploid		NA	NA	WashU	NA	-1	-1	NA										8
Thyroid Carcinoma (TCGA, PanCancer Atlas)	TCGA-DJ-A2Q1-01	Papillary Thyroid Cancer	CCDC6-RET	OncoKB: Oncogenic, level_1;CIViC: Predictive: 2;MyCancerGenome: not present;CancerHotspot: no;3DHotspot: no	MutationAssessor: NA;SIFT: NA;Polyphen-2: NA	Fusion	NA	diploid		NA	NA	WashU	NA	-1	-1	NA										17
Thyroid Carcinoma (TCGA, PanCancer Atlas)	TCGA-DJ-A3V3-01	Papillary Thyroid Cancer	CCDC6-RET	OncoKB: Oncogenic, level_1;CIViC: Predictive: 2;MyCancerGenome: not present;CancerHotspot: no;3DHotspot: no	MutationAssessor: NA;SIFT: NA;Polyphen-2: NA	Fusion	NA	diploid		NA	NA	WashU	NA	-1	-1	NA										6
Thyroid Carcinoma (TCGA, PanCancer Atlas)	TCGA-DJ-A4UQ-01	Papillary Thyroid Cancer	CCDC6-RET	OncoKB: Oncogenic, level_1;CIViC: Predictive: 2;MyCancerGenome: not present;CancerHotspot: no;3DHotspot: no	MutationAssessor: NA;SIFT: NA;Polyphen-2: NA	Fusion	NA	diploid		NA	NA	WashU	NA	-1	-1	NA										15
Thyroid Carcinoma (TCGA, PanCancer Atlas)	TCGA-DJ-A4V5-01	Papillary Thyroid Cancer	CCDC6-RET	OncoKB: Oncogenic, level_1;CIViC: Predictive: 2;MyCancerGenome: not present;CancerHotspot: no;3DHotspot: no	MutationAssessor: NA;SIFT: NA;Polyphen-2: NA	Fusion	NA	diploid		NA	NA	WashU	NA	-1	-1	NA										4
Thyroid Carcinoma (TCGA, PanCancer Atlas)	TCGA-DO-A1JZ-01	Papillary Thyroid Cancer	CCDC6-RET	OncoKB: Oncogenic, level_1;CIViC: Predictive: 2;MyCancerGenome: not present;CancerHotspot: no;3DHotspot: no	MutationAssessor: NA;SIFT: NA;Polyphen-2: NA	Fusion	NA	diploid		NA	NA	WashU	NA	-1	-1	NA										5
Thyroid Carcinoma (TCGA, PanCancer Atlas)	TCGA-E3-A3E0-01	Papillary Thyroid Cancer	CCDC6-RET	OncoKB: Oncogenic, level_1;CIViC: Predictive: 2;MyCancerGenome: not present;CancerHotspot: no;3DHotspot: no	MutationAssessor: NA;SIFT: NA;Polyphen-2: NA	Fusion	NA	diploid		NA	NA	WashU	NA	-1	-1	NA										6
Thyroid Carcinoma (TCGA, PanCancer Atlas)	TCGA-E8-A44M-01	Papillary Thyroid Cancer	CCDC6-RET	OncoKB: Oncogenic, level_1;CIViC: Predictive: 2;MyCancerGenome: not present;CancerHotspot: no;3DHotspot: no	MutationAssessor: NA;SIFT: NA;Polyphen-2: NA	Fusion	NA	diploid		NA	NA	WashU	NA	-1	-1	NA										3
Thyroid Carcinoma (TCGA, PanCancer Atlas)	TCGA-EL-A3CY-01	Papillary Thyroid Cancer	CCDC6-RET	OncoKB: Oncogenic, level_1;CIViC: Predictive: 2;MyCancerGenome: not present;CancerHotspot: no;3DHotspot: no	MutationAssessor: NA;SIFT: NA;Polyphen-2: NA	Fusion	NA	diploid		NA	NA	WashU	NA	-1	-1	NA										2
Thyroid Carcinoma (TCGA, PanCancer Atlas)	TCGA-EL-A3TB-01	Papillary Thyroid Cancer	CCDC6-RET	OncoKB: Oncogenic, level_1;CIViC: Predictive: 2;MyCancerGenome: not present;CancerHotspot: no;3DHotspot: no	MutationAssessor: NA;SIFT: NA;Polyphen-2: NA	Fusion	NA	diploid		NA	NA	WashU	NA	-1	-1	NA										16
Thyroid Carcinoma (TCGA, PanCancer Atlas)	TCGA-EL-A3ZP-01	Papillary Thyroid Cancer	CCDC6-RET	OncoKB: Oncogenic, level_1;CIViC: Predictive: 2;MyCancerGenome: not present;CancerHotspot: no;3DHotspot: no	MutationAssessor: NA;SIFT: NA;Polyphen-2: NA	Fusion	NA	diploid		NA	NA	WashU	NA	-1	-1	NA										3
Thyroid Carcinoma (TCGA, PanCancer Atlas)	TCGA-EL-A3ZS-01	Papillary Thyroid Cancer	CCDC6-RET	OncoKB: Oncogenic, level_1;CIViC: Predictive: 2;MyCancerGenome: not present;CancerHotspot: no;3DHotspot: no	MutationAssessor: NA;SIFT: NA;Polyphen-2: NA	Fusion	NA	diploid		NA	NA	WashU	NA	-1	-1	NA										5
Thyroid Carcinoma (TCGA, PanCancer Atlas)	TCGA-EM-A3AN-01	Papillary Thyroid Cancer	CCDC6-RET	OncoKB: Oncogenic, level_1;CIViC: Predictive: 2;MyCancerGenome: not present;CancerHotspot: no;3DHotspot: no	MutationAssessor: NA;SIFT: NA;Polyphen-2: NA	Fusion	NA	diploid		NA	NA	WashU	NA	-1	-1	NA										8
Thyroid Carcinoma (TCGA, PanCancer Atlas)	TCGA-ET-A39R-01	Papillary Thyroid Cancer	CCDC6-RET	OncoKB: Oncogenic, level_1;CIViC: Predictive: 2;MyCancerGenome: not present;CancerHotspot: no;3DHotspot: no	MutationAssessor: NA;SIFT: NA;Polyphen-2: NA	Fusion	NA	diploid		NA	NA	WashU	NA	-1	-1	NA										264
Thyroid Carcinoma (TCGA, PanCancer Atlas)	TCGA-ET-A3DR-01	Papillary Thyroid Cancer	CCDC6-RET	OncoKB: Oncogenic, level_1;CIViC: Predictive: 2;MyCancerGenome: not present;CancerHotspot: no;3DHotspot: no	MutationAssessor: NA;SIFT: NA;Polyphen-2: NA	Fusion	NA	diploid		NA	NA	WashU	NA	-1	-1	NA										12
Thyroid Carcinoma (TCGA, PanCancer Atlas)	TCGA-ET-A40T-01	Papillary Thyroid Cancer	CCDC6-RET	OncoKB: Oncogenic, level_1;CIViC: Predictive: 2;MyCancerGenome: not present;CancerHotspot: no;3DHotspot: no	MutationAssessor: NA;SIFT: NA;Polyphen-2: NA	Fusion	NA	diploid		NA	NA	WashU	NA	-1	-1	NA										8
Thyroid Carcinoma (TCGA, PanCancer Atlas)	TCGA-FK-A3SE-01	Papillary Thyroid Cancer	CCDC6-RET	OncoKB: Oncogenic, level_1;CIViC: Predictive: 2;MyCancerGenome: not present;CancerHotspot: no;3DHotspot: no	MutationAssessor: NA;SIFT: NA;Polyphen-2: NA	Fusion	NA	diploid		NA	NA	WashU	NA	-1	-1	NA										2
Thyroid Carcinoma (TCGA, PanCancer Atlas)	TCGA-FK-A4UB-01	Papillary Thyroid Cancer	CCDC6-RET	OncoKB: Oncogenic, level_1;CIViC: Predictive: 2;MyCancerGenome: not present;CancerHotspot: no;3DHotspot: no	MutationAssessor: NA;SIFT: NA;Polyphen-2: NA	Fusion	NA	diploid		NA	NA	WashU	NA	-1	-1	NA										4
Thyroid Carcinoma (TCGA, PanCancer Atlas)	TCGA-J8-A4HW-01	Papillary Thyroid Cancer	CCDC6-RET	OncoKB: Oncogenic, level_1;CIViC: Predictive: 2;MyCancerGenome: not present;CancerHotspot: no;3DHotspot: no	MutationAssessor: NA;SIFT: NA;Polyphen-2: NA	Fusion	NA	diploid		NA	NA	WashU	NA	-1	-1	NA										10
Lung Adenocarcinoma (TCGA, PanCancer Atlas)	TCGA-75-6203-01	Lung Adenocarcinoma	CCDC6-RET	OncoKB: Oncogenic, level_1;CIViC: Predictive: 2;MyCancerGenome: not present;CancerHotspot: no;3DHotspot: no	MutationAssessor: NA;SIFT: NA;Polyphen-2: NA	Fusion	NA	diploid		NA	NA	WashU	NA	-1	-1	NA										11
Thyroid Carcinoma (TCGA, PanCancer Atlas)	TCGA-EL-A3T9-01	Papillary Thyroid Cancer	ERC1-RET	OncoKB: Likely Oncogenic, level_1;CIViC: NA;MyCancerGenome: not present;CancerHotspot: no;3DHotspot: no	MutationAssessor: NA;SIFT: NA;Polyphen-2: NA	Fusion	NA	shallowdel		NA	NA	WashU	NA	-1	-1	NA										17
Thyroid Carcinoma (TCGA, PanCancer Atlas)	TCGA-EM-A3FQ-01	Papillary Thyroid Cancer	ERC1-RET	OncoKB: Likely Oncogenic, level_1;CIViC: NA;MyCancerGenome: not present;CancerHotspot: no;3DHotspot: no	MutationAssessor: NA;SIFT: NA;Polyphen-2: NA	Fusion	NA	diploid		NA	NA	WashU	NA	-1	-1	NA										2
Thyroid Carcinoma (TCGA, PanCancer Atlas)	TCGA-ET-A3DQ-01	Papillary Thyroid Cancer	FKBP15-RET	OncoKB: Likely Oncogenic, level_1;CIViC: NA;MyCancerGenome: not present;CancerHotspot: no;3DHotspot: no	MutationAssessor: NA;SIFT: NA;Polyphen-2: NA	Fusion	NA	diploid		NA	NA	WashU	NA	-1	-1	NA										3
Thyroid Carcinoma (TCGA, PanCancer Atlas)	TCGA-CE-A482-01	Papillary Thyroid Cancer	NCOA4-RET	OncoKB: Oncogenic, level_1;CIViC: NA;MyCancerGenome: not present;CancerHotspot: no;3DHotspot: no	MutationAssessor: NA;SIFT: NA;Polyphen-2: NA	Fusion	NA	diploid		NA	NA	WashU	NA	-1	-1	NA										4
Thyroid Carcinoma (TCGA, PanCancer Atlas)	TCGA-DE-A3KN-01	Papillary Thyroid Cancer	NCOA4-RET	OncoKB: Oncogenic, level_1;CIViC: NA;MyCancerGenome: not present;CancerHotspot: no;3DHotspot: no	MutationAssessor: NA;SIFT: NA;Polyphen-2: NA	Fusion	NA	deepdel		NA	NA	WashU	NA	-1	-1	NA										11
Thyroid Carcinoma (TCGA, PanCancer Atlas)	TCGA-EL-A3H3-01	Papillary Thyroid Cancer	NCOA4-RET	OncoKB: Oncogenic, level_1;CIViC: NA;MyCancerGenome: not present;CancerHotspot: no;3DHotspot: no	MutationAssessor: NA;SIFT: NA;Polyphen-2: NA	Fusion	NA	deepdel		NA	NA	WashU	NA	-1	-1	NA										1
Thyroid Carcinoma (TCGA, PanCancer Atlas)	TCGA-EM-A2CU-01	Papillary Thyroid Cancer	NCOA4-RET	OncoKB: Oncogenic, level_1;CIViC: NA;MyCancerGenome: not present;CancerHotspot: no;3DHotspot: no	MutationAssessor: NA;SIFT: NA;Polyphen-2: NA	Fusion	NA	diploid		NA	NA	WashU	NA	-1	-1	NA										16
Thyroid Carcinoma (TCGA, PanCancer Atlas)	TCGA-CE-A13K-01	Papillary Thyroid Cancer	RET-MRLN	OncoKB: Likely Oncogenic, level_1;CIViC: NA;MyCancerGenome: not present;CancerHotspot: no;3DHotspot: no	MutationAssessor: NA;SIFT: NA;Polyphen-2: NA	Fusion	NA	diploid		NA	NA	WashU	NA	-1	-1	NA										8
Thyroid Carcinoma (TCGA, PanCancer Atlas)	TCGA-CE-A482-01	Papillary Thyroid Cancer	RET-NCOA4	OncoKB: Oncogenic, level_1;CIViC: NA;MyCancerGenome: not present;CancerHotspot: no;3DHotspot: no	MutationAssessor: NA;SIFT: NA;Polyphen-2: NA	Fusion	NA	diploid		NA	NA	WashU	NA	-1	-1	NA										4
Thyroid Carcinoma (TCGA, PanCancer Atlas)	TCGA-DJ-A4V5-01	Papillary Thyroid Cancer	RET-CCDC6	OncoKB: Oncogenic, level_1;CIViC: NA;MyCancerGenome: not present;CancerHotspot: no;3DHotspot: no	MutationAssessor: NA;SIFT: NA;Polyphen-2: NA	Fusion	NA	diploid		NA	NA	WashU	NA	-1	-1	NA										4
Thyroid Carcinoma (TCGA, PanCancer Atlas)	TCGA-CE-A481-01	Papillary Thyroid Cancer	TRIM27-RET	OncoKB: Likely Oncogenic, level_1;CIViC: NA;MyCancerGenome: not present;CancerHotspot: no;3DHotspot: no	MutationAssessor: NA;SIFT: NA;Polyphen-2: NA	Fusion	NA	diploid		NA	NA	WashU	NA	-1	-1	NA										11
Thyroid Carcinoma (TCGA, PanCancer Atlas)	TCGA-CE-A485-01	Papillary Thyroid Cancer	SPECC1L-RET	OncoKB: Likely Oncogenic, level_1;CIViC: NA;MyCancerGenome: not present;CancerHotspot: no;3DHotspot: no	MutationAssessor: NA;SIFT: NA;Polyphen-2: NA	Fusion	NA	diploid		NA	NA	WashU	NA	-1	-1	NA										4
Thyroid Carcinoma (TCGA, PanCancer Atlas)	TCGA-DE-A69K-01	Papillary Thyroid Cancer	DLG5-RET	OncoKB: Likely Oncogenic, level_1;CIViC: NA;MyCancerGenome: not present;CancerHotspot: no;3DHotspot: no	MutationAssessor: NA;SIFT: NA;Polyphen-2: NA	Fusion	NA	diploid		NA	NA	WashU	NA	-1	-1	NA										12
Thyroid Carcinoma (TCGA, PanCancer Atlas)	TCGA-ET-A40R-01	Papillary Thyroid Cancer	TBL1XR1-RET	OncoKB: Likely Oncogenic, level_1;CIViC: NA;MyCancerGenome: not present;CancerHotspot: no;3DHotspot: no	MutationAssessor: NA;SIFT: NA;Polyphen-2: NA	Fusion	NA	diploid		NA	NA	WashU	NA	-1	-1	NA
Thyroid Carcinoma (TCGA, PanCancer Atlas)	TCGA-FK-A3SG-01	Papillary Thyroid Cancer	AKAP13-RET	OncoKB: Likely Oncogenic, level_1;CIViC: NA;MyCancerGenome: not present;CancerHotspot: no;3DHotspot: no	MutationAssessor: NA;SIFT: NA;Polyphen-2: NA	Fusion	NA	diploid		NA	NA	WashU	NA	-1	-1	NA										7
Lung Adenocarcinoma (TCGA, PanCancer Atlas)	TCGA-55-6543-01	Lung Adenocarcinoma	TRIM33-RET	OncoKB: Likely Oncogenic, level_1;CIViC: NA;MyCancerGenome: not present;CancerHotspot: no;3DHotspot: no	MutationAssessor: NA;SIFT: NA;Polyphen-2: NA	Fusion	NA	diploid		NA	NA	WashU	NA	-1	-1	NA										23
Pheochromocytoma and Paraganglioma (TCGA, PanCancer Atlas)	TCGA-QT-A5XK-01	Pheochromocytoma	M918T	OncoKB: Oncogenic, level_3b;CIViC: Predictive: 6, Prognostic: 1, Diagnostic: 1;MyCancerGenome: present;CancerHotspot: yes;3DHotspot: no	MutationAssessor: impact: low, score: 1.71;SIFT: impact: deleterious, score: 0;Polyphen-2: impact: probably_damaging, score: 1	Missense_Mutation	SNP	diploid	295	.	.	.	10	43617416	43617416	T	C	10:g.43617416T>C	ENST00000355710.3:c.2753T>C	0.28	0.0055	57	146	1	181	8	16/20
Pheochromocytoma and Paraganglioma (TCGA, PanCancer Atlas)	TCGA-QT-A5XM-01	Pheochromocytoma	M918T	OncoKB: Oncogenic, level_3b;CIViC: Predictive: 6, Prognostic: 1, Diagnostic: 1;MyCancerGenome: present;CancerHotspot: yes;3DHotspot: no	MutationAssessor: impact: low, score: 1.71;SIFT: impact: deleterious, score: 0;Polyphen-2: impact: probably_damaging, score: 1	Missense_Mutation	SNP	diploid	295	.	.	.	10	43617416	43617416	T	C	10:g.43617416T>C	ENST00000355710.3:c.2753T>C	0.25		41	120		168	7	16/20
Pheochromocytoma and Paraganglioma (TCGA, PanCancer Atlas)	TCGA-WB-A80V-01	Pheochromocytoma	M918T	OncoKB: Oncogenic, level_3b;CIViC: Predictive: 6, Prognostic: 1, Diagnostic: 1;MyCancerGenome: present;CancerHotspot: yes;3DHotspot: no	MutationAssessor: impact: low, score: 1.71;SIFT: impact: deleterious, score: 0;Polyphen-2: impact: probably_damaging, score: 1	Missense_Mutation	SNP	diploid	295	.	.	.	10	43617416	43617416	T	C	10:g.43617416T>C	ENST00000355710.3:c.2753T>C	0.39		52	81		154	17	16/20
Pheochromocytoma and Paraganglioma (TCGA, PanCancer Atlas)	TCGA-WB-A819-01	Pheochromocytoma	M918T	OncoKB: Oncogenic, level_3b;CIViC: Predictive: 6, Prognostic: 1, Diagnostic: 1;MyCancerGenome: present;CancerHotspot: yes;3DHotspot: no	MutationAssessor: impact: low, score: 1.71;SIFT: impact: deleterious, score: 0;Polyphen-2: impact: probably_damaging, score: 1	Missense_Mutation	SNP	diploid	295	.	.	.	10	43617416	43617416	T	C	10:g.43617416T>C	ENST00000355710.3:c.2753T>C	0.29		38	91		144	7	16/20
Pheochromocytoma and Paraganglioma (TCGA, PanCancer Atlas)	TCGA-SP-A6QK-01	Pheochromocytoma	C634R	OncoKB: Oncogenic, level_3b;CIViC: Diagnostic: 1;MyCancerGenome: not present;CancerHotspot: no;3DHotspot: no	MutationAssessor: impact: medium, score: 2.74;SIFT: impact: deleterious, score: 0;Polyphen-2: impact: probably_damaging, score: 0.999	Missense_Mutation	SNP	diploid	28	.	.	.	10	43609948	43609948	T	C	10:g.43609948T>C	ENST00000355710.3:c.1900T>C	0.29		12	29		38	8	44520
Ovarian Serous Cystadenocarcinoma (TCGA, PanCancer Atlas)	TCGA-24-2298-01	Serous Ovarian Cancer	CCDC6-RET	OncoKB: Oncogenic, level_3b;CIViC: Predictive: 2;MyCancerGenome: not present;CancerHotspot: no;3DHotspot: no	MutationAssessor: NA;SIFT: NA;Polyphen-2: NA	Fusion	NA	diploid		NA	NA	WashU	NA	-1	-1	NA										122
Colorectal Adenocarcinoma (TCGA, PanCancer Atlas)	TCGA-CM-4743-01	Colon Adenocarcinoma	CCDC6-RET	OncoKB: Oncogenic, level_3b;CIViC: Predictive: 2;MyCancerGenome: not present;CancerHotspot: no;3DHotspot: no	MutationAssessor: NA;SIFT: NA;Polyphen-2: NA	Fusion	NA	amp		NA	NA	WashU	NA	-1	-1	NA										1106
Lung Adenocarcinoma (TCGA, PanCancer Atlas)	TCGA-86-A4JF-01	Lung Adenocarcinoma	V648I	OncoKB: Likely Oncogenic, level_3b;CIViC: NA;MyCancerGenome: not present;CancerHotspot: no;3DHotspot: no	MutationAssessor: impact: neutral, score: 0.595;SIFT: impact: tolerated, score: 0.66;Polyphen-2: impact: benign, score: 0.025	Missense_Mutation	SNP	shallowdel	2	.	.	.	10	43609990	43609990	G	A	10:g.43609990G>A	ENST00000355710.3:c.1942G>A	0.25		16	47		119	1228	44520
Uterine Corpus Endometrial Carcinoma (TCGA, PanCancer Atlas)	TCGA-BS-A0UF-01	Uterine Endometrioid Carcinoma	S891L	OncoKB: Likely Oncogenic, level_3b;CIViC: NA;MyCancerGenome: not present;CancerHotspot: no;3DHotspot: no	MutationAssessor: impact: medium, score: 2.735;SIFT: impact: deleterious, score: 0;Polyphen-2: impact: probably_damaging, score: 1	Missense_Mutation	SNP	diploid	1	.	.	.	10	43615593	43615593	C	T	10:g.43615593C>T	ENST00000355710.3:c.2672C>T	0.37		60	102		96	8376	15/20
Uterine Corpus Endometrial Carcinoma (TCGA, PanCancer Atlas)	TCGA-E6-A1M0-01	Uterine Endometrioid Carcinoma	S891L	OncoKB: Likely Oncogenic, level_3b;CIViC: NA;MyCancerGenome: not present;CancerHotspot: no;3DHotspot: no	MutationAssessor: impact: medium, score: 2.735;SIFT: impact: deleterious, score: 0;Polyphen-2: impact: probably_damaging, score: 1	Missense_Mutation	SNP	gain	1	.	.	.	10	43615593	43615593	C	T	10:g.43615593C>T	ENST00000355710.3:c.2672C>T	0.47		30	34		70	1737	15/20
Esophageal Adenocarcinoma (TCGA, PanCancer Atlas)	TCGA-L5-A8NG-01	Esophageal Adenocarcinoma	M848I	OncoKB: Likely Oncogenic, level_3b;CIViC: NA;MyCancerGenome: not present;CancerHotspot: no;3DHotspot: no	MutationAssessor: impact: neutral, score: 0.455;SIFT: impact: tolerated, score: 0.4;Polyphen-2: impact: probably_damaging, score: 0.984	Missense_Mutation	SNP	diploid		.	.	.	10	43615130	43615130	G	C	10:g.43615130G>C	ENST00000355710.3:c.2544G>C	0.11		3	25		67	124	14/20
Sarcoma (TCGA, PanCancer Atlas)	TCGA-DX-A3U7-01	Leiomyosarcoma	R886Q	OncoKB: Likely Oncogenic, level_3b;CIViC: NA;MyCancerGenome: not present;CancerHotspot: no;3DHotspot: no	MutationAssessor: impact: neutral, score: 0.705;SIFT: impact: tolerated, score: 0.09;Polyphen-2: impact: probably_damaging, score: 0.999	Missense_Mutation	SNP	shallowdel		.	.	.	10	43615578	43615578	G	A	10:g.43615578G>A	ENST00000355710.3:c.2657G>A	0.4		17	26		55	31	15/20
Colorectal Adenocarcinoma (TCGA, PanCancer Atlas)	TCGA-AA-3947-01	Mucinous Adenocarcinoma of the Colon and Rectum	E511K	OncoKB: Likely Oncogenic, level_3b;CIViC: NA;MyCancerGenome: not present;CancerHotspot: no;3DHotspot: no	MutationAssessor: impact: low, score: 1.535;SIFT: impact: tolerated, score: 0.36;Polyphen-2: impact: benign, score: 0.024	Missense_Mutation	SNP	diploid	1	.	.	.	10	43607555	43607555	G	A	10:g.43607555G>A	ENST00000355710.3:c.1531G>A	0.29		23	55		111	2295	44428
Pheochromocytoma and Paraganglioma (TCGA, PanCancer Atlas)	TCGA-W2-A7HA-01	Pheochromocytoma	D631Y	OncoKB: Likely Oncogenic, level_3b;CIViC: NA;MyCancerGenome: not present;CancerHotspot: no;3DHotspot: no	MutationAssessor: impact: medium, score: 2.65;SIFT: impact: deleterious, score: 0.01;Polyphen-2: impact: probably_damaging, score: 0.996	Missense_Mutation	SNP	diploid	3	.	.	.	10	43609939	43609939	G	T	10:g.43609939G>T	ENST00000355710.3:c.1891G>T	0.4		19	29		35	16	44520
Uterine Corpus Endometrial Carcinoma (TCGA, PanCancer Atlas)	TCGA-B5-A3FA-01	Uterine Endometrioid Carcinoma	E511D	OncoKB: Likely Oncogenic, level_3b;CIViC: NA;MyCancerGenome: not present;CancerHotspot: no;3DHotspot: no	MutationAssessor: impact: medium, score: 2.43;SIFT: impact: tolerated, score: 0.15;Polyphen-2: impact: benign, score: 0.013	Missense_Mutation	SNP	diploid	1	.	.	.	10	43607557	43607557	G	T	10:g.43607557G>T	ENST00000355710.3:c.1533G>T	0.36		4	7		19	9652	44428
Uterine Corpus Endometrial Carcinoma (TCGA, PanCancer Atlas)	TCGA-E6-A1LX-01	Uterine Endometrioid Carcinoma	E768G	OncoKB: Likely Oncogenic, level_3b;CIViC: NA;MyCancerGenome: not present;CancerHotspot: no;3DHotspot: no	MutationAssessor: impact: low, score: 1.865;SIFT: impact: deleterious, score: 0;Polyphen-2: impact: benign, score: 0.332	Missense_Mutation	SNP	diploid	8	.	.	.	10	43613839	43613839	A	G	10:g.43613839A>G	ENST00000355710.3:c.2303A>G	0.12		5	37		33	12691	13/20
Breast Invasive Carcinoma (TCGA, PanCancer Atlas)	TCGA-C8-A1HJ-01	Breast Invasive Ductal Carcinoma	ERC1-RET	OncoKB: Likely Oncogenic, level_3b;CIViC: NA;MyCancerGenome: not present;CancerHotspot: no;3DHotspot: no	MutationAssessor: NA;SIFT: NA;Polyphen-2: NA	Fusion	NA	amp		NA	NA	WashU	NA	-1	-1	NA										96
Acute Myeloid Leukemia (TCGA, PanCancer Atlas)	TCGA-AB-2971-03	Acute Myeloid Leukemia	FKBP15-RET	OncoKB: Likely Oncogenic, level NA;CIViC: NA;MyCancerGenome: not present;CancerHotspot: no;3DHotspot: no	MutationAssessor: NA;SIFT: NA;Polyphen-2: NA	Fusion	NA	diploid		NA	NA	WashU	NA	-1	-1	NA										9
Breast Invasive Carcinoma (TCGA, PanCancer Atlas)	TCGA-A7-A0D9-01	Breast Invasive Ductal Carcinoma	R330Q	OncoKB: Unknown, level NA;CIViC: NA;MyCancerGenome: not present;CancerHotspot: no;3DHotspot: no	MutationAssessor: impact: medium, score: 2.585;SIFT: impact: tolerated, score: 0.2;Polyphen-2: impact: possibly_damaging, score: 0.888	Missense_Mutation	SNP	diploid	2	.	.	.	10	43601945	43601945	G	A	10:g.43601945G>A	ENST00000355710.3:c.989G>A	0.46		6	7		16	20	44336
Uterine Corpus Endometrial Carcinoma (TCGA, PanCancer Atlas)	TCGA-EC-A24G-01	Uterine Endometrioid Carcinoma	R330Q	OncoKB: Unknown, level NA;CIViC: NA;MyCancerGenome: not present;CancerHotspot: no;3DHotspot: no	MutationAssessor: impact: medium, score: 2.585;SIFT: impact: tolerated, score: 0.2;Polyphen-2: impact: possibly_damaging, score: 0.888	Missense_Mutation	SNP	diploid	2	.	.	.	10	43601945	43601945	G	A	10:g.43601945G>A	ENST00000355710.3:c.989G>A	0.23		10	33		83	1019	44336
Breast Invasive Carcinoma (TCGA, PanCancer Atlas)	TCGA-BH-A0C0-01	Breast Invasive Ductal Carcinoma	P117T	OncoKB: Unknown, level NA;CIViC: NA;MyCancerGenome: not present;CancerHotspot: no;3DHotspot: no	MutationAssessor: impact: medium, score: 2.625;SIFT: impact: deleterious_low_confidence, score: 0.01;Polyphen-2: impact: benign, score: 0.242	Missense_Mutation	SNP	gain	1	.	.	.	10	43597801	43597801	C	A	10:g.43597801C>A	ENST00000355710.3:c.349C>A	0.11		5	39		109	92	44275
Glioblastoma Multiforme (TCGA, PanCancer Atlas)	TCGA-19-1390-01	Glioblastoma Multiforme	N361I	OncoKB: Unknown, level NA;CIViC: NA;MyCancerGenome: not present;CancerHotspot: no;3DHotspot: no	MutationAssessor: impact: neutral, score: 0.695;SIFT: impact: deleterious, score: 0;Polyphen-2: impact: benign, score: 0.377	Missense_Mutation	SNP	diploid	1	.	.	.	10	43604497	43604497	A	T	10:g.43604497A>T	ENST00000355710.3:c.1082A>T	0.45		30	37		79	94	44367
Glioblastoma Multiforme (TCGA, PanCancer Atlas)	TCGA-32-1979-01	Glioblastoma Multiforme	N437I	OncoKB: Unknown, level NA;CIViC: NA;MyCancerGenome: not present;CancerHotspot: no;3DHotspot: no	MutationAssessor: impact: low, score: 0.805;SIFT: impact: tolerated, score: 0.2;Polyphen-2: impact: benign, score: 0.043	Missense_Mutation	SNP	shallowdel	1	.	.	.	10	43606701	43606701	A	T	10:g.43606701A>T	ENST00000355710.3:c.1310A>T	0.5		36	36		122	71	44397
Brain Lower Grade Glioma (TCGA, PanCancer Atlas)	TCGA-DU-5852-01	Oligoastrocytoma	G47S	OncoKB: Unknown, level NA;CIViC: NA;MyCancerGenome: not present;CancerHotspot: no;3DHotspot: no	MutationAssessor: impact: medium, score: 2.42;SIFT: impact: deleterious_low_confidence, score: 0.01;Polyphen-2: impact: possibly_damaging, score: 0.875	Missense_Mutation	SNP	shallowdel	1	.	.	.	10	43595972	43595972	G	A	10:g.43595972G>A	ENST00000355710.3:c.139G>A	0.79		26	7		51	65	44247
Brain Lower Grade Glioma (TCGA, PanCancer Atlas)	TCGA-DU-7290-01	Astrocytoma	P182S	OncoKB: Unknown, level NA;CIViC: NA;MyCancerGenome: not present;CancerHotspot: no;3DHotspot: no	MutationAssessor: impact: medium, score: 2.695;SIFT: impact: tolerated, score: 0.06;Polyphen-2: impact: benign, score: 0.251	Missense_Mutation	SNP	shallowdel	1	.	.	.	10	43597996	43597996	C	T	10:g.43597996C>T	ENST00000355710.3:c.544C>T	0.55		23	19		44	32	44275
Prostate Adenocarcinoma (TCGA, PanCancer Atlas)	TCGA-KK-A7B4-01	Prostate Adenocarcinoma	A1046S	OncoKB: Unknown, level NA;CIViC: NA;MyCancerGenome: not present;CancerHotspot: no;3DHotspot: no	MutationAssessor: impact: neutral, score: 0.695;SIFT: impact: deleterious_low_confidence, score: 0.01;Polyphen-2: impact: benign, score: 0.201	Missense_Mutation	SNP	gain	1	.	.	.	10	43622119	43622119	G	T	10:g.43622119G>T	ENST00000355710.3:c.3136G>T	0.39		37	58		138	26	19/20
Lung Squamous Cell Carcinoma (TCGA, PanCancer Atlas)	TCGA-92-8063-01	Lung Squamous Cell Carcinoma	R114H	OncoKB: Unknown, level NA;CIViC: NA;MyCancerGenome: not present;CancerHotspot: no;3DHotspot: no	MutationAssessor: impact: neutral, score: 0;SIFT: impact: tolerated_low_confidence, score: 0.14;Polyphen-2: impact: benign, score: 0.001	Missense_Mutation	SNP	diploid	2	.	.	.	10	43597793	43597793	G	A	10:g.43597793G>A	ENST00000355710.3:c.341G>A	0.26		28	81		125	351	44275
Skin Cutaneous Melanoma (TCGA, PanCancer Atlas)	TCGA-ER-A19O-06	Cutaneous Melanoma	E480K	OncoKB: Unknown, level NA;CIViC: NA;MyCancerGenome: not present;CancerHotspot: no;3DHotspot: no	MutationAssessor: impact: medium, score: 2.215;SIFT: impact: tolerated, score: 0.19;Polyphen-2: impact: benign, score: 0.024	Missense_Mutation	SNP	diploid	1	.	.	.	10	43606829	43606829	G	A	10:g.43606829G>A	ENST00000355710.3:c.1438G>A	0.26		11	31		37	219	44397
Lung Adenocarcinoma (TCGA, PanCancer Atlas)	TCGA-69-8255-01	Lung Adenocarcinoma	L1048Pfs*11	OncoKB: Unknown, level NA;CIViC: NA;MyCancerGenome: not present;CancerHotspot: no;3DHotspot: no	MutationAssessor: NA;SIFT: NA;Polyphen-2: NA	Frame_Shift_Ins	INS	shallowdel		.	.	.	10	43622119	43622120	-	C	10:g.43622119_43622120insC	ENST00000355710.3:c.3142dup	0.2		20	82		126	270	19/20
Lung Adenocarcinoma (TCGA, PanCancer Atlas)	TCGA-05-4432-01	Lung Adenocarcinoma	R77L	OncoKB: Unknown, level NA;CIViC: NA;MyCancerGenome: not present;CancerHotspot: no;3DHotspot: no	MutationAssessor: impact: medium, score: 2.27;SIFT: impact: tolerated_low_confidence, score: 0.29;Polyphen-2: impact: benign, score: 0.007	Missense_Mutation	SNP	gain	4	.	.	.	10	43596063	43596063	G	T	10:g.43596063G>T	ENST00000355710.3:c.230G>T	0.33		9	18		29	534	44247
Pancreatic Adenocarcinoma (TCGA, PanCancer Atlas)	TCGA-IB-7651-01	Pancreatic Adenocarcinoma	R844W	OncoKB: Unknown, level NA;CIViC: NA;MyCancerGenome: not present;CancerHotspot: no;3DHotspot: no	MutationAssessor: impact: low, score: 1.75;SIFT: impact: deleterious, score: 0;Polyphen-2: impact: probably_damaging, score: 1	Missense_Mutation	SNP	diploid	1	.	.	.	10	43615116	43615116	C	T	10:g.43615116C>T	ENST00000355710.3:c.2530C>T	0.13		44	306		61	14306	14/20
Uterine Corpus Endometrial Carcinoma (TCGA, PanCancer Atlas)	TCGA-EY-A215-01	Uterine Endometrioid Carcinoma	A373V	OncoKB: Unknown, level NA;CIViC: NA;MyCancerGenome: not present;CancerHotspot: no;3DHotspot: no	MutationAssessor: impact: neutral, score: 0.69;SIFT: impact: tolerated, score: 0.35;Polyphen-2: impact: benign, score: 0.006	Missense_Mutation	SNP	diploid	2	.	.	.	10	43604533	43604533	C	T	10:g.43604533C>T	ENST00000355710.3:c.1118C>T	0.39		15	23		60	4650	44367
Colorectal Adenocarcinoma (TCGA, PanCancer Atlas)	TCGA-AM-5821-01	Colon Adenocarcinoma	A373V	OncoKB: Unknown, level NA;CIViC: NA;MyCancerGenome: not present;CancerHotspot: no;3DHotspot: no	MutationAssessor: impact: neutral, score: 0.69;SIFT: impact: tolerated, score: 0.35;Polyphen-2: impact: benign, score: 0.006	Missense_Mutation	SNP	diploid	2	.	.	.	10	43604533	43604533	C	T	10:g.43604533C>T	ENST00000355710.3:c.1118C>T	0.24		9	28		46	1205	44367
Head and Neck Squamous Cell Carcinoma (TCGA, PanCancer Atlas)	TCGA-HD-7229-01	Head and Neck Squamous Cell Carcinoma	A373V	OncoKB: Unknown, level NA;CIViC: NA;MyCancerGenome: not present;CancerHotspot: no;3DHotspot: no	MutationAssessor: impact: neutral, score: 0.69;SIFT: impact: tolerated, score: 0.35;Polyphen-2: impact: benign, score: 0.006	Missense_Mutation	SNP	diploid	2	.	.	.	10	43604533	43604533	C	T	10:g.43604533C>T	ENST00000355710.3:c.1118C>T	0.3		16	37		61	151	44367
Colorectal Adenocarcinoma (TCGA, PanCancer Atlas)	TCGA-AD-6901-01	Colon Adenocarcinoma	T48M	OncoKB: Unknown, level NA;CIViC: NA;MyCancerGenome: not present;CancerHotspot: no;3DHotspot: no	MutationAssessor: impact: low, score: 1.075;SIFT: impact: tolerated_low_confidence, score: 0.13;Polyphen-2: impact: benign, score: 0.251	Missense_Mutation	SNP	shallowdel	1	.	.	.	10	43595976	43595976	C	T	10:g.43595976C>T	ENST00000355710.3:c.143C>T	0.29		10	25		61	223	44247
Stomach Adenocarcinoma (TCGA, PanCancer Atlas)	TCGA-CD-A48C-01	Stomach Adenocarcinoma	V706M	OncoKB: Unknown, level NA;CIViC: NA;MyCancerGenome: not present;CancerHotspot: no;3DHotspot: no	MutationAssessor: impact: low, score: 0.975;SIFT: impact: deleterious, score: 0.01;Polyphen-2: impact: possibly_damaging, score: 0.72	Missense_Mutation	SNP	diploid	3	.	.	.	10	43610164	43610164	G	A	10:g.43610164G>A	ENST00000355710.3:c.2116G>A	0.39		13	20		51	191	44520
Colorectal Adenocarcinoma (TCGA, PanCancer Atlas)	TCGA-AA-A022-01	Colon Adenocarcinoma	V706M	OncoKB: Unknown, level NA;CIViC: NA;MyCancerGenome: not present;CancerHotspot: no;3DHotspot: no	MutationAssessor: impact: low, score: 0.975;SIFT: impact: deleterious, score: 0.01;Polyphen-2: impact: possibly_damaging, score: 0.72	Missense_Mutation	SNP	diploid	3	.	.	.	10	43610164	43610164	G	A	10:g.43610164G>A	ENST00000355710.3:c.2116G>A	0.38		13	21		34	1466	44520
Esophageal Adenocarcinoma (TCGA, PanCancer Atlas)	TCGA-L5-A4OT-01	Esophageal Adenocarcinoma	C565F	OncoKB: Unknown, level NA;CIViC: NA;MyCancerGenome: not present;CancerHotspot: no;3DHotspot: no	MutationAssessor: impact: medium, score: 2.74;SIFT: impact: deleterious, score: 0;Polyphen-2: impact: possibly_damaging, score: 0.897	Missense_Mutation	SNP	shallowdel		.	.	.	10	43608346	43608346	G	T	10:g.43608346G>T	ENST00000355710.3:c.1694G>T	0.11		6	47		40	213	44459
Stomach Adenocarcinoma (TCGA, PanCancer Atlas)	TCGA-BR-4184-01	Stomach Adenocarcinoma	A432V	OncoKB: Unknown, level NA;CIViC: NA;MyCancerGenome: not present;CancerHotspot: no;3DHotspot: no	MutationAssessor: impact: neutral, score: 0;SIFT: impact: tolerated, score: 0.11;Polyphen-2: impact: benign, score: 0.047	Missense_Mutation	SNP	diploid	2	.	.	.	10	43606686	43606686	C	T	10:g.43606686C>T	ENST00000355710.3:c.1295C>T	0.35		29	54		85	3126	44397
Colorectal Adenocarcinoma (TCGA, PanCancer Atlas)	TCGA-AD-6895-01	Colon Adenocarcinoma	A432V	OncoKB: Unknown, level NA;CIViC: NA;MyCancerGenome: not present;CancerHotspot: no;3DHotspot: no	MutationAssessor: impact: neutral, score: 0;SIFT: impact: tolerated, score: 0.11;Polyphen-2: impact: benign, score: 0.047	Missense_Mutation	SNP	diploid	2	.	.	.	10	43606686	43606686	C	T	10:g.43606686C>T	ENST00000355710.3:c.1295C>T	0.28		7	18		42	1534	44397
Stomach Adenocarcinoma (TCGA, PanCancer Atlas)	TCGA-BR-8372-01	Stomach Adenocarcinoma	P613L	OncoKB: Unknown, level NA;CIViC: NA;MyCancerGenome: not present;CancerHotspot: no;3DHotspot: no	MutationAssessor: impact: medium, score: 2.075;SIFT: impact: deleterious, score: 0.04;Polyphen-2: impact: benign, score: 0.061	Missense_Mutation	SNP	diploid	1	.	.	.	10	43609082	43609082	C	T	10:g.43609082C>T	ENST00000355710.3:c.1838C>T	0.23		5	17		54	1158	44489
Stomach Adenocarcinoma (TCGA, PanCancer Atlas)	TCGA-BR-A4IU-01	Diffuse Type Stomach Adenocarcinoma	R721Q	OncoKB: Unknown, level NA;CIViC: NA;MyCancerGenome: not present;CancerHotspot: no;3DHotspot: no	MutationAssessor: impact: low, score: 1.495;SIFT: impact: deleterious, score: 0;Polyphen-2: impact: probably_damaging, score: 0.997	Missense_Mutation	SNP	diploid	2	.	.	.	10	43612057	43612057	G	A	10:g.43612057G>A	ENST00000355710.3:c.2162G>A	0.11		12	97		121	24	44550
Stomach Adenocarcinoma (TCGA, PanCancer Atlas)	TCGA-CD-A4MG-01	Diffuse Type Stomach Adenocarcinoma	A1046T	OncoKB: Unknown, level NA;CIViC: NA;MyCancerGenome: not present;CancerHotspot: no;3DHotspot: no	MutationAssessor: impact: neutral, score: 0.695;SIFT: impact: tolerated_low_confidence, score: 0.13;Polyphen-2: impact: benign, score: 0.125	Missense_Mutation	SNP	diploid	1	.	.	.	10	43622119	43622119	G	A	10:g.43622119G>A	ENST00000355710.3:c.3136G>A	0.24	0.0087	25	80	1	114	2185	19/20
Stomach Adenocarcinoma (TCGA, PanCancer Atlas)	TCGA-CG-4305-01	Stomach Adenocarcinoma	R205G	OncoKB: Unknown, level NA;CIViC: NA;MyCancerGenome: not present;CancerHotspot: no;3DHotspot: no	MutationAssessor: impact: low, score: 1.245;SIFT: impact: tolerated, score: 0.34;Polyphen-2: impact: benign, score: 0	Missense_Mutation	SNP	diploid	1	.	.	.	10	43598065	43598065	A	G	10:g.43598065A>G	ENST00000355710.3:c.613A>G	0.13		8	53		55	1092	44275
Stomach Adenocarcinoma (TCGA, PanCancer Atlas)	TCGA-CG-4305-01	Stomach Adenocarcinoma	M1009V	OncoKB: Unknown, level NA;CIViC: NA;MyCancerGenome: not present;CancerHotspot: no;3DHotspot: no	MutationAssessor: impact: low, score: 0.81;SIFT: impact: deleterious, score: 0.01;Polyphen-2: impact: probably_damaging, score: 0.975	Missense_Mutation	SNP	diploid	1	.	.	.	10	43620416	43620416	A	G	10:g.43620416A>G	ENST00000355710.3:c.3025A>G	0.26		23	66		110	1092	18/20
Stomach Adenocarcinoma (TCGA, PanCancer Atlas)	TCGA-D7-A4YV-01	Tubular Stomach Adenocarcinoma	T451M	OncoKB: Unknown, level NA;CIViC: NA;MyCancerGenome: not present;CancerHotspot: no;3DHotspot: no	MutationAssessor: impact: neutral, score: 0.69;SIFT: impact: deleterious, score: 0.02;Polyphen-2: impact: possibly_damaging, score: 0.57	Missense_Mutation	SNP	diploid	2	.	.	.	10	43606743	43606743	C	T	10:g.43606743C>T	ENST00000355710.3:c.1352C>T	0.24		41	127		165	822	44397
Uterine Corpus Endometrial Carcinoma (TCGA, PanCancer Atlas)	TCGA-D1-A160-01	Uterine Endometrioid Carcinoma	T451M	OncoKB: Unknown, level NA;CIViC: NA;MyCancerGenome: not present;CancerHotspot: no;3DHotspot: no	MutationAssessor: impact: neutral, score: 0.69;SIFT: impact: deleterious, score: 0.02;Polyphen-2: impact: possibly_damaging, score: 0.57	Missense_Mutation	SNP	diploid	2	.	.	.	10	43606743	43606743	C	T	10:g.43606743C>T	ENST00000355710.3:c.1352C>T	0.33		20	40		94	499	44397
Stomach Adenocarcinoma (TCGA, PanCancer Atlas)	TCGA-FP-8099-01	Stomach Adenocarcinoma	G69D	OncoKB: Unknown, level NA;CIViC: NA;MyCancerGenome: not present;CancerHotspot: no;3DHotspot: no	MutationAssessor: impact: medium, score: 2.52;SIFT: impact: tolerated_low_confidence, score: 0.11;Polyphen-2: impact: possibly_damaging, score: 0.89	Missense_Mutation	SNP	diploid	1	.	.	.	10	43596039	43596039	G	A	10:g.43596039G>A	ENST00000355710.3:c.206G>A	0.13		10	67		77	115	44247
Stomach Adenocarcinoma (TCGA, PanCancer Atlas)	TCGA-FP-8631-01	Intestinal Type Stomach Adenocarcinoma	N1045S	OncoKB: Unknown, level NA;CIViC: NA;MyCancerGenome: not present;CancerHotspot: no;3DHotspot: no	MutationAssessor: impact: neutral, score: 0.695;SIFT: impact: tolerated_low_confidence, score: 0.11;Polyphen-2: impact: benign, score: 0.058	Missense_Mutation	SNP	shallowdel	1	.	.	.	10	43622117	43622117	A	G	10:g.43622117A>G	ENST00000355710.3:c.3134A>G	0.34		39	75		125	85	19/20
Stomach Adenocarcinoma (TCGA, PanCancer Atlas)	TCGA-HU-A4G8-01	Diffuse Type Stomach Adenocarcinoma	A349V	OncoKB: Unknown, level NA;CIViC: NA;MyCancerGenome: not present;CancerHotspot: no;3DHotspot: no	MutationAssessor: impact: medium, score: 2.48;SIFT: impact: tolerated, score: 0.17;Polyphen-2: impact: possibly_damaging, score: 0.731	Missense_Mutation	SNP	diploid	1	.	.	.	10	43602002	43602002	C	T	10:g.43602002C>T	ENST00000355710.3:c.1046C>T	0.25		9	27		33	1374	44336
Uterine Corpus Endometrial Carcinoma (TCGA, PanCancer Atlas)	TCGA-AJ-A3EK-01	Uterine Endometrioid Carcinoma	A349V	OncoKB: Unknown, level NA;CIViC: NA;MyCancerGenome: not present;CancerHotspot: no;3DHotspot: no	MutationAssessor: impact: medium, score: 2.48;SIFT: impact: tolerated, score: 0.17;Polyphen-2: impact: possibly_damaging, score: 0.731	Missense_Mutation	SNP	diploid	1	.	.	.	10	43602002	43602002	C	T	10:g.43602002C>T	ENST00000355710.3:c.1046C>T	0.26		12	34		14	5730	44336
Stomach Adenocarcinoma (TCGA, PanCancer Atlas)	TCGA-HU-A4GU-01	Diffuse Type Stomach Adenocarcinoma	A793T	OncoKB: Unknown, level NA;CIViC: NA;MyCancerGenome: not present;CancerHotspot: no;3DHotspot: no	MutationAssessor: impact: low, score: 1.275;SIFT: impact: deleterious, score: 0;Polyphen-2: impact: probably_damaging, score: 0.999	Missense_Mutation	SNP	amp	1	.	.	.	10	43613913	43613913	G	A	10:g.43613913G>A	ENST00000355710.3:c.2377G>A	0.2		11	45		73	1310	13/20
Head and Neck Squamous Cell Carcinoma (TCGA, PanCancer Atlas)	TCGA-BA-6869-01	Head and Neck Squamous Cell Carcinoma	C585S	OncoKB: Unknown, level NA;CIViC: NA;MyCancerGenome: not present;CancerHotspot: no;3DHotspot: no	MutationAssessor: impact: medium, score: 2.74;SIFT: impact: deleterious, score: 0;Polyphen-2: impact: probably_damaging, score: 0.999	Missense_Mutation	SNP	diploid		.	.	.	10	43608405	43608405	T	A	10:g.43608405T>A	ENST00000355710.3:c.1753T>A	0.29		12	29		37	427	44459
Head and Neck Squamous Cell Carcinoma (TCGA, PanCancer Atlas)	TCGA-CN-6994-01	Head and Neck Squamous Cell Carcinoma	E616del	OncoKB: Unknown, level NA;CIViC: NA;MyCancerGenome: not present;CancerHotspot: no;3DHotspot: no	MutationAssessor: NA;SIFT: NA;Polyphen-2: NA	In_Frame_Del	DEL	gain		.	.	.	10	43609084	43609086	GAG	-	10:g.43609084_43609086del	ENST00000355710.3:c.1846_1848del	0.39		13	20		27	107	44489
Head and Neck Squamous Cell Carcinoma (TCGA, PanCancer Atlas)	TCGA-CQ-6228-01	Head and Neck Squamous Cell Carcinoma	A386T	OncoKB: Unknown, level NA;CIViC: NA;MyCancerGenome: not present;CancerHotspot: no;3DHotspot: no	MutationAssessor: impact: neutral, score: -1.39;SIFT: impact: tolerated, score: 0.35;Polyphen-2: impact: benign, score: 0.003	Missense_Mutation	SNP	shallowdel		.	.	.	10	43604571	43604571	G	A	10:g.43604571G>A	ENST00000355710.3:c.1156G>A	0.47		20	23		46	104	44367
Head and Neck Squamous Cell Carcinoma (TCGA, PanCancer Atlas)	TCGA-CR-6472-01	Head and Neck Squamous Cell Carcinoma	T946A	OncoKB: Unknown, level NA;CIViC: NA;MyCancerGenome: not present;CancerHotspot: no;3DHotspot: no	MutationAssessor: impact: low, score: 1.83;SIFT: impact: deleterious, score: 0;Polyphen-2: impact: possibly_damaging, score: 0.759	Missense_Mutation	SNP	diploid		.	.	.	10	43619153	43619153	A	G	10:g.43619153A>G	ENST00000355710.3:c.2836A>G	0.4		75	113		175	422	17/20
Head and Neck Squamous Cell Carcinoma (TCGA, PanCancer Atlas)	TCGA-CR-7402-01	Head and Neck Squamous Cell Carcinoma	Q44H	OncoKB: Unknown, level NA;CIViC: NA;MyCancerGenome: not present;CancerHotspot: no;3DHotspot: no	MutationAssessor: impact: medium, score: 2.81;SIFT: impact: deleterious_low_confidence, score: 0;Polyphen-2: impact: probably_damaging, score: 0.972	Missense_Mutation	SNP	diploid		.	.	.	10	43595965	43595965	G	T	10:g.43595965G>T	ENST00000355710.3:c.132G>T	0.32		20	43		59	916	44247
Head and Neck Squamous Cell Carcinoma (TCGA, PanCancer Atlas)	TCGA-CV-5440-01	Head and Neck Squamous Cell Carcinoma	E337V	OncoKB: Unknown, level NA;CIViC: NA;MyCancerGenome: not present;CancerHotspot: no;3DHotspot: no	MutationAssessor: impact: medium, score: 2.67;SIFT: impact: deleterious, score: 0.01;Polyphen-2: impact: probably_damaging, score: 0.999	Missense_Mutation	SNP	diploid	2	.	.	.	10	43601966	43601966	A	T	10:g.43601966A>T	ENST00000355710.3:c.1010A>T	0.38		6	10		61	101	44336
Head and Neck Squamous Cell Carcinoma (TCGA, PanCancer Atlas)	TCGA-CV-7433-01	Head and Neck Squamous Cell Carcinoma	K740N	OncoKB: Unknown, level NA;CIViC: NA;MyCancerGenome: not present;CancerHotspot: no;3DHotspot: no	MutationAssessor: impact: medium, score: 2.8;SIFT: impact: deleterious, score: 0;Polyphen-2: impact: possibly_damaging, score: 0.852	Missense_Mutation	SNP	diploid		.	.	.	10	43612115	43612115	G	T	10:g.43612115G>T	ENST00000355710.3:c.2220G>T	0.15		33	181		262	106	44550
Lung Adenocarcinoma (TCGA, PanCancer Atlas)	TCGA-49-4505-01	Lung Adenocarcinoma	T350N	OncoKB: Unknown, level NA;CIViC: NA;MyCancerGenome: not present;CancerHotspot: no;3DHotspot: no	MutationAssessor: impact: medium, score: 2.585;SIFT: impact: deleterious, score: 0.02;Polyphen-2: impact: probably_damaging, score: 0.975	Missense_Mutation	SNP	shallowdel		.	.	.	10	43602005	43602005	C	A	10:g.43602005C>A	ENST00000355710.3:c.1049C>A	0.1		6	53		38	187	44336
Lung Adenocarcinoma (TCGA, PanCancer Atlas)	TCGA-49-6745-01	Lung Adenocarcinoma	S891*	OncoKB: Unknown, level NA;CIViC: NA;MyCancerGenome: not present;CancerHotspot: no;3DHotspot: no	MutationAssessor: NA;SIFT: NA;Polyphen-2: NA	Nonsense_Mutation	SNP	diploid	1	.	.	.	10	43615593	43615593	C	A	10:g.43615593C>A	ENST00000355710.3:c.2672C>A	0.21		8	31		37	128	15/20
Lung Adenocarcinoma (TCGA, PanCancer Atlas)	TCGA-50-5049-01	Lung Adenocarcinoma	P566T	OncoKB: Unknown, level NA;CIViC: NA;MyCancerGenome: not present;CancerHotspot: no;3DHotspot: no	MutationAssessor: impact: medium, score: 2.72;SIFT: impact: deleterious, score: 0;Polyphen-2: impact: probably_damaging, score: 0.96	Missense_Mutation	SNP	gain	1	.	.	.	10	43608348	43608348	C	A	10:g.43608348C>A	ENST00000355710.3:c.1696C>A	0.11		4	32		31	746	44459
Lung Adenocarcinoma (TCGA, PanCancer Atlas)	TCGA-55-7576-01	Lung Adenocarcinoma	A496G	OncoKB: Unknown, level NA;CIViC: NA;MyCancerGenome: not present;CancerHotspot: no;3DHotspot: no	MutationAssessor: impact: medium, score: 2.28;SIFT: impact: deleterious, score: 0.01;Polyphen-2: impact: benign, score: 0.318	Missense_Mutation	SNP	diploid		.	.	.	10	43606878	43606878	C	G	10:g.43606878C>G	ENST00000355710.3:c.1487C>G	0.16		6	32		19	371	44397
Lung Adenocarcinoma (TCGA, PanCancer Atlas)	TCGA-95-7039-01	Lung Adenocarcinoma	M484T	OncoKB: Unknown, level NA;CIViC: NA;MyCancerGenome: not present;CancerHotspot: no;3DHotspot: no	MutationAssessor: impact: neutral, score: -1.59;SIFT: impact: tolerated, score: 0.82;Polyphen-2: impact: benign, score: 0	Missense_Mutation	SNP	diploid	1	.	.	.	10	43606842	43606842	T	C	10:g.43606842T>C	ENST00000355710.3:c.1451T>C	0.29		11	27		33	1209	44397
Uterine Corpus Endometrial Carcinoma (TCGA, PanCancer Atlas)	TCGA-A5-A0GW-01	Uterine Endometrioid Carcinoma	G115S	OncoKB: Unknown, level NA;CIViC: NA;MyCancerGenome: not present;CancerHotspot: no;3DHotspot: no	MutationAssessor: impact: low, score: 1.55;SIFT: impact: tolerated_low_confidence, score: 0.28;Polyphen-2: impact: benign, score: 0.027	Missense_Mutation	SNP	diploid	1	.	.	.	10	43597795	43597795	G	A	10:g.43597795G>A	ENST00000355710.3:c.343G>A	0.2		11	43		55	307	44275
Uterine Corpus Endometrial Carcinoma (TCGA, PanCancer Atlas)	TCGA-AP-A0LM-01	Uterine Endometrioid Carcinoma	R959W	OncoKB: Unknown, level NA;CIViC: NA;MyCancerGenome: not present;CancerHotspot: no;3DHotspot: no	MutationAssessor: impact: low, score: 1.36;SIFT: impact: deleterious, score: 0;Polyphen-2: impact: probably_damaging, score: 1	Missense_Mutation	SNP	diploid	3	.	.	.	10	43619192	43619192	C	T	10:g.43619192C>T	ENST00000355710.3:c.2875C>T	0.13		20	129		126	13187	17/20
Colorectal Adenocarcinoma (TCGA, PanCancer Atlas)	TCGA-CA-6718-01	Colon Adenocarcinoma	R959W	OncoKB: Unknown, level NA;CIViC: NA;MyCancerGenome: not present;CancerHotspot: no;3DHotspot: no	MutationAssessor: impact: low, score: 1.36;SIFT: impact: deleterious, score: 0;Polyphen-2: impact: probably_damaging, score: 1	Missense_Mutation	SNP	diploid	3	.	.	.	10	43619192	43619192	C	T	10:g.43619192C>T	ENST00000355710.3:c.2875C>T	0.39		20	31		45	3205	17/20
Uterine Corpus Endometrial Carcinoma (TCGA, PanCancer Atlas)	TCGA-AX-A05Z-01	Uterine Endometrioid Carcinoma	I657S	OncoKB: Unknown, level NA;CIViC: NA;MyCancerGenome: not present;CancerHotspot: no;3DHotspot: no	MutationAssessor: impact: medium, score: 2.545;SIFT: impact: deleterious, score: 0;Polyphen-2: impact: possibly_damaging, score: 0.843	Missense_Mutation	SNP	diploid	1	.	.	.	10	43610018	43610018	T	G	10:g.43610018T>G	ENST00000355710.3:c.1970T>G	0.3		10	23		27	7369	44520
Uterine Corpus Endometrial Carcinoma (TCGA, PanCancer Atlas)	TCGA-AX-A05Z-01	Uterine Endometrioid Carcinoma	E1006D	OncoKB: Unknown, level NA;CIViC: NA;MyCancerGenome: not present;CancerHotspot: no;3DHotspot: no	MutationAssessor: impact: neutral, score: 0.11;SIFT: impact: deleterious, score: 0.03;Polyphen-2: impact: benign, score: 0.019	Missense_Mutation	SNP	diploid	1	.	.	.	10	43620409	43620409	G	T	10:g.43620409G>T	ENST00000355710.3:c.3018G>T	0.2		5	20		35	7369	18/20
Uterine Corpus Endometrial Carcinoma (TCGA, PanCancer Atlas)	TCGA-AX-A0J0-01	Uterine Endometrioid Carcinoma	R721W	OncoKB: Unknown, level NA;CIViC: NA;MyCancerGenome: not present;CancerHotspot: no;3DHotspot: no	MutationAssessor: impact: low, score: 1.495;SIFT: impact: deleterious, score: 0;Polyphen-2: impact: probably_damaging, score: 1	Missense_Mutation	SNP	diploid	2	.	.	.	10	43612056	43612056	C	T	10:g.43612056C>T	ENST00000355710.3:c.2161C>T	0.4		76	115		91	7790	44550
Uterine Corpus Endometrial Carcinoma (TCGA, PanCancer Atlas)	TCGA-B5-A0JY-01	Uterine Endometrioid Carcinoma	E623K	OncoKB: Unknown, level NA;CIViC: NA;MyCancerGenome: not present;CancerHotspot: no;3DHotspot: no	MutationAssessor: impact: medium, score: 2.43;SIFT: impact: tolerated, score: 0.28;Polyphen-2: impact: possibly_damaging, score: 0.589	Missense_Mutation	SNP	diploid	1	.	.	.	10	43609111	43609111	G	A	10:g.43609111G>A	ENST00000355710.3:c.1867G>A	0.41		26	37		49	9706	44489
Ovarian Serous Cystadenocarcinoma (TCGA, PanCancer Atlas)	TCGA-59-2349-01	Serous Ovarian Cancer	A680T	OncoKB: Unknown, level NA;CIViC: NA;MyCancerGenome: not present;CancerHotspot: no;3DHotspot: no	MutationAssessor: impact: low, score: 1.095;SIFT: impact: tolerated, score: 0.2;Polyphen-2: impact: benign, score: 0.174	Missense_Mutation	SNP	diploid	1	.	.	.	10	43610086	43610086	G	A	10:g.43610086G>A	ENST00000355710.3:c.2038G>A	0.53		19	17		58	797	44520
Uterine Corpus Endometrial Carcinoma (TCGA, PanCancer Atlas)	TCGA-B5-A0K1-01	Uterine Endometrioid Carcinoma	A680T	OncoKB: Unknown, level NA;CIViC: NA;MyCancerGenome: not present;CancerHotspot: no;3DHotspot: no	MutationAssessor: impact: low, score: 1.095;SIFT: impact: tolerated, score: 0.2;Polyphen-2: impact: benign, score: 0.174	Missense_Mutation	SNP	diploid	1	.	.	.	10	43610086	43610086	G	A	10:g.43610086G>A	ENST00000355710.3:c.2038G>A	0.44		23	29		48	42	44520
Uterine Corpus Endometrial Carcinoma (TCGA, PanCancer Atlas)	TCGA-B5-A0K9-01	Uterine Endometrioid Carcinoma	V573M	OncoKB: Unknown, level NA;CIViC: NA;MyCancerGenome: not present;CancerHotspot: no;3DHotspot: no	MutationAssessor: impact: medium, score: 2.545;SIFT: impact: deleterious, score: 0.03;Polyphen-2: impact: possibly_damaging, score: 0.901	Missense_Mutation	SNP	diploid	1	.	.	.	10	43608369	43608369	G	A	10:g.43608369G>A	ENST00000355710.3:c.1717G>A	0.27		48	129		146	757	44459
Uterine Corpus Endometrial Carcinoma (TCGA, PanCancer Atlas)	TCGA-B5-A11E-01	Uterine Endometrioid Carcinoma	R418*	OncoKB: Unknown, level NA;CIViC: NA;MyCancerGenome: not present;CancerHotspot: no;3DHotspot: no	MutationAssessor: NA;SIFT: NA;Polyphen-2: NA	Nonsense_Mutation	SNP	diploid	1	.	.	.	10	43604667	43604667	C	T	10:g.43604667C>T	ENST00000355710.3:c.1252C>T	0.33		6	12		21	9039	44367
Colorectal Adenocarcinoma (TCGA, PanCancer Atlas)	TCGA-NH-A6GA-01	Colon Adenocarcinoma	R418*	OncoKB: Unknown, level NA;CIViC: NA;MyCancerGenome: not present;CancerHotspot: no;3DHotspot: no	MutationAssessor: NA;SIFT: NA;Polyphen-2: NA	Nonsense_Mutation	SNP	diploid	1	.	.	.	10	43604667	43604667	C	T	10:g.43604667C>T	ENST00000355710.3:c.1252C>T	0.39		18	28		34	84	44367
Uterine Corpus Endometrial Carcinoma (TCGA, PanCancer Atlas)	TCGA-B5-A11E-01	Uterine Endometrioid Carcinoma	R844Q	OncoKB: Unknown, level NA;CIViC: NA;MyCancerGenome: not present;CancerHotspot: no;3DHotspot: no	MutationAssessor: impact: low, score: 0.83;SIFT: impact: deleterious, score: 0.03;Polyphen-2: impact: probably_damaging, score: 0.997	Missense_Mutation	SNP	diploid	1	.	.	.	10	43615117	43615117	G	A	10:g.43615117G>A	ENST00000355710.3:c.2531G>A	0.56		10	8		12	9039	14/20
Uterine Corpus Endometrial Carcinoma (TCGA, PanCancer Atlas)	TCGA-D1-A17B-01	Uterine Endometrioid Carcinoma	A672S	OncoKB: Unknown, level NA;CIViC: NA;MyCancerGenome: not present;CancerHotspot: no;3DHotspot: no	MutationAssessor: impact: low, score: 1.495;SIFT: impact: deleterious, score: 0.02;Polyphen-2: impact: possibly_damaging, score: 0.727	Missense_Mutation	SNP	diploid	1	.	.	.	10	43610062	43610062	G	T	10:g.43610062G>T	ENST00000355710.3:c.2014G>T	0.15		20	115		138	286	44520
Bladder Urothelial Carcinoma (TCGA, PanCancer Atlas)	TCGA-DK-A3WW-01	Bladder Urothelial Carcinoma	E884K	OncoKB: Unknown, level NA;CIViC: NA;MyCancerGenome: not present;CancerHotspot: no;3DHotspot: no	MutationAssessor: impact: neutral, score: 0.555;SIFT: impact: deleterious, score: 0.02;Polyphen-2: impact: probably_damaging, score: 0.998	Missense_Mutation	SNP	diploid	3	.	.	.	10	43615571	43615571	G	A	10:g.43615571G>A	ENST00000355710.3:c.2650G>A	0.22		11	38		46	1083	15/20
Skin Cutaneous Melanoma (TCGA, PanCancer Atlas)	TCGA-EE-A2MR-06	Cutaneous Melanoma	E337K	OncoKB: Unknown, level NA;CIViC: NA;MyCancerGenome: not present;CancerHotspot: no;3DHotspot: no	MutationAssessor: impact: medium, score: 2.67;SIFT: impact: tolerated, score: 0.06;Polyphen-2: impact: probably_damaging, score: 0.999	Missense_Mutation	SNP	diploid	2	.	.	.	10	43601965	43601965	G	A	10:g.43601965G>A	ENST00000355710.3:c.1009G>A	0.21		8	31		31	2920	44336
Bladder Urothelial Carcinoma (TCGA, PanCancer Atlas)	TCGA-G2-A2EO-01	Bladder Urothelial Carcinoma	E337K	OncoKB: Unknown, level NA;CIViC: NA;MyCancerGenome: not present;CancerHotspot: no;3DHotspot: no	MutationAssessor: impact: medium, score: 2.67;SIFT: impact: tolerated, score: 0.06;Polyphen-2: impact: probably_damaging, score: 0.999	Missense_Mutation	SNP	diploid	2	.	.	.	10	43601965	43601965	G	A	10:g.43601965G>A	ENST00000355710.3:c.1009G>A	0.35		11	20		45	821	44336
Bladder Urothelial Carcinoma (TCGA, PanCancer Atlas)	TCGA-GC-A3BM-01	Bladder Urothelial Carcinoma	D1081H	OncoKB: Unknown, level NA;CIViC: NA;MyCancerGenome: not present;CancerHotspot: no;3DHotspot: no	MutationAssessor: impact: neutral, score: 0.695;SIFT: NA;Polyphen-2: NA	Missense_Mutation	SNP	shallowdel	1	.	.	.	10	43623613	43623613	G	C	10:g.43623613G>C	ENST00000355710.3:c.3241G>C	0.32		41	86		179	116	20/20
Bladder Urothelial Carcinoma (TCGA, PanCancer Atlas)	TCGA-GC-A3YS-01	Bladder Urothelial Carcinoma	A999E	OncoKB: Unknown, level NA;CIViC: NA;MyCancerGenome: not present;CancerHotspot: no;3DHotspot: no	MutationAssessor: impact: low, score: 1.15;SIFT: impact: tolerated, score: 0.1;Polyphen-2: impact: possibly_damaging, score: 0.831	Missense_Mutation	SNP	diploid	1	.	.	.	10	43620387	43620387	C	A	10:g.43620387C>A	ENST00000355710.3:c.2996C>A	0.25		24	72		108	217	18/20
Lung Squamous Cell Carcinoma (TCGA, PanCancer Atlas)	TCGA-34-5929-01	Lung Squamous Cell Carcinoma	E235Q	OncoKB: Unknown, level NA;CIViC: NA;MyCancerGenome: not present;CancerHotspot: no;3DHotspot: no	MutationAssessor: impact: medium, score: 2.62;SIFT: impact: deleterious, score: 0.03;Polyphen-2: impact: possibly_damaging, score: 0.646	Missense_Mutation	SNP	shallowdel	1	.	.	.	10	43600477	43600477	G	C	10:g.43600477G>C	ENST00000355710.3:c.703G>C	0.78		14	4		32	197	44306
Lung Squamous Cell Carcinoma (TCGA, PanCancer Atlas)	TCGA-66-2766-01	Lung Squamous Cell Carcinoma	S462L	OncoKB: Unknown, level NA;CIViC: NA;MyCancerGenome: not present;CancerHotspot: no;3DHotspot: no	MutationAssessor: impact: medium, score: 2.2;SIFT: impact: tolerated, score: 0.63;Polyphen-2: impact: benign, score: 0.124	Missense_Mutation	SNP	diploid	1	.	.	.	10	43606776	43606776	C	T	10:g.43606776C>T	ENST00000355710.3:c.1385C>T	0.28		67	175		200	330	44397
Lung Squamous Cell Carcinoma (TCGA, PanCancer Atlas)	TCGA-77-8133-01	Lung Squamous Cell Carcinoma	S462L	OncoKB: Unknown, level NA;CIViC: NA;MyCancerGenome: not present;CancerHotspot: no;3DHotspot: no	MutationAssessor: impact: medium, score: 2.2;SIFT: impact: tolerated, score: 0.63;Polyphen-2: impact: benign, score: 0.124	Missense_Mutation	SNP	shallowdel	1	.	.	.	10	43606776	43606776	C	T	10:g.43606776C>T	ENST00000355710.3:c.1385C>T	0.16		25	132		173	342	44397
Lung Squamous Cell Carcinoma (TCGA, PanCancer Atlas)	TCGA-66-2780-01	Lung Squamous Cell Carcinoma	M255I	OncoKB: Unknown, level NA;CIViC: NA;MyCancerGenome: not present;CancerHotspot: no;3DHotspot: no	MutationAssessor: impact: medium, score: 2.125;SIFT: impact: tolerated, score: 0.49;Polyphen-2: impact: benign, score: 0.02	Missense_Mutation	SNP	diploid	1	.	.	.	10	43600539	43600539	G	T	10:g.43600539G>T	ENST00000355710.3:c.765G>T	0.19		6	26		32	124	44306
Colorectal Adenocarcinoma (TCGA, PanCancer Atlas)	TCGA-AA-3821-01	Mucinous Adenocarcinoma of the Colon and Rectum	R77H	OncoKB: Unknown, level NA;CIViC: NA;MyCancerGenome: not present;CancerHotspot: no;3DHotspot: no	MutationAssessor: impact: low, score: 1.575;SIFT: impact: tolerated_low_confidence, score: 0.28;Polyphen-2: impact: benign, score: 0.01	Missense_Mutation	SNP	diploid	4	.	.	.	10	43596063	43596063	G	A	10:g.43596063G>A	ENST00000355710.3:c.230G>A	0.43		18	24		14	792	44247
Pancreatic Adenocarcinoma (TCGA, PanCancer Atlas)	TCGA-IB-7651-01	Pancreatic Adenocarcinoma	R770*	OncoKB: Unknown, level NA;CIViC: NA;MyCancerGenome: not present;CancerHotspot: no;3DHotspot: no	MutationAssessor: NA;SIFT: NA;Polyphen-2: NA	Nonsense_Mutation	SNP	diploid	2	.	.	.	10	43613844	43613844	C	T	10:g.43613844C>T	ENST00000355710.3:c.2308C>T	0.15		26	149		46	14306	13/20
Colorectal Adenocarcinoma (TCGA, PanCancer Atlas)	TCGA-AA-3875-01	Colon Adenocarcinoma	R770*	OncoKB: Unknown, level NA;CIViC: NA;MyCancerGenome: not present;CancerHotspot: no;3DHotspot: no	MutationAssessor: NA;SIFT: NA;Polyphen-2: NA	Nonsense_Mutation	SNP	diploid	2	.	.	.	10	43613844	43613844	C	T	10:g.43613844C>T	ENST00000355710.3:c.2308C>T	0.26		5	14		14	118	13/20
Skin Cutaneous Melanoma (TCGA, PanCancer Atlas)	TCGA-FS-A1ZW-06	Cutaneous Melanoma	X25_splice	OncoKB: Unknown, level NA;CIViC: NA;MyCancerGenome: not present;CancerHotspot: no;3DHotspot: no	MutationAssessor: impact: , score: undefined;SIFT: NA;Polyphen-2: NA	Splice_Site	SNP	shallowdel		.	.	.	10	43595906	43595906	G	A	10:g.43595906G>A	ENST00000355710.3:c.74-1G>A	0.37		26	45		46	589
Lung Squamous Cell Carcinoma (TCGA, PanCancer Atlas)	TCGA-21-1079-01	Lung Squamous Cell Carcinoma	P951S	OncoKB: Unknown, level NA;CIViC: NA;MyCancerGenome: not present;CancerHotspot: no;3DHotspot: no	MutationAssessor: impact: medium, score: 3.37;SIFT: impact: deleterious, score: 0;Polyphen-2: impact: probably_damaging, score: 1	Missense_Mutation	SNP	diploid		.	.	.	10	43619168	43619168	C	T	10:g.43619168C>T	ENST00000355710.3:c.2851C>T	0.15		12	68		160	1412	17/20
Lung Squamous Cell Carcinoma (TCGA, PanCancer Atlas)	TCGA-21-1082-01	Lung Squamous Cell Carcinoma	W917R	OncoKB: Unknown, level NA;CIViC: NA;MyCancerGenome: not present;CancerHotspot: no;3DHotspot: no	MutationAssessor: impact: medium, score: 3.295;SIFT: impact: deleterious, score: 0;Polyphen-2: impact: probably_damaging, score: 1	Missense_Mutation	SNP	shallowdel		.	.	.	10	43617412	43617412	T	C	10:g.43617412T>C	ENST00000355710.3:c.2749T>C	0.52		104	97		314	336	16/20
Lung Squamous Cell Carcinoma (TCGA, PanCancer Atlas)	TCGA-43-5668-01	Lung Squamous Cell Carcinoma	R33Kfs*29	OncoKB: Unknown, level NA;CIViC: NA;MyCancerGenome: not present;CancerHotspot: no;3DHotspot: no	MutationAssessor: NA;SIFT: NA;Polyphen-2: NA	Frame_Shift_Ins	INS	diploid		.	.	.	10	43595929	43595930	-	A	10:g.43595929_43595930insA	ENST00000355710.3:c.97dup	0.2		15	59		40	602	44247
Lung Squamous Cell Carcinoma (TCGA, PanCancer Atlas)	TCGA-43-7658-01	Lung Squamous Cell Carcinoma	E366*	OncoKB: Unknown, level NA;CIViC: NA;MyCancerGenome: not present;CancerHotspot: no;3DHotspot: no	MutationAssessor: NA;SIFT: NA;Polyphen-2: NA	Nonsense_Mutation	SNP	shallowdel		.	.	.	10	43604511	43604511	G	T	10:g.43604511G>T	ENST00000355710.3:c.1096G>T	0.32		9	19		50	184	44367
Head and Neck Squamous Cell Carcinoma (TCGA, PanCancer Atlas)	TCGA-CV-7421-01	Head and Neck Squamous Cell Carcinoma	E366*	OncoKB: Unknown, level NA;CIViC: NA;MyCancerGenome: not present;CancerHotspot: no;3DHotspot: no	MutationAssessor: NA;SIFT: NA;Polyphen-2: NA	Nonsense_Mutation	SNP	diploid		.	.	.	10	43604511	43604511	G	T	10:g.43604511G>T	ENST00000355710.3:c.1096G>T	0.12		4	29		55	160	44367
Lung Adenocarcinoma (TCGA, PanCancer Atlas)	TCGA-44-7667-01	Lung Adenocarcinoma	R494M	OncoKB: Unknown, level NA;CIViC: NA;MyCancerGenome: not present;CancerHotspot: no;3DHotspot: no	MutationAssessor: impact: low, score: 1.445;SIFT: impact: tolerated, score: 0.12;Polyphen-2: impact: benign, score: 0.02	Missense_Mutation	SNP	gain	1	.	.	.	10	43606872	43606872	G	T	10:g.43606872G>T	ENST00000355710.3:c.1481G>T	0.32		11	23		50	431	44397
Lung Adenocarcinoma (TCGA, PanCancer Atlas)	TCGA-49-AARQ-01	Lung Adenocarcinoma	A479S	OncoKB: Unknown, level NA;CIViC: NA;MyCancerGenome: not present;CancerHotspot: no;3DHotspot: no	MutationAssessor: impact: low, score: 1.265;SIFT: impact: tolerated, score: 0.74;Polyphen-2: impact: benign, score: 0.006	Missense_Mutation	SNP	shallowdel		.	.	.	10	43606826	43606826	G	T	10:g.43606826G>T	ENST00000355710.3:c.1435G>T	0.26		10	29		45	640	44397
Lung Adenocarcinoma (TCGA, PanCancer Atlas)	TCGA-55-5899-01	Lung Adenocarcinoma	R297L	OncoKB: Unknown, level NA;CIViC: NA;MyCancerGenome: not present;CancerHotspot: no;3DHotspot: no	MutationAssessor: impact: medium, score: 2.25;SIFT: impact: tolerated, score: 0.66;Polyphen-2: impact: benign, score: 0.085	Missense_Mutation	SNP	diploid		.	.	.	10	43601846	43601846	G	T	10:g.43601846G>T	ENST00000355710.3:c.890G>T	0.16		5	27		20	387	44336
Lung Adenocarcinoma (TCGA, PanCancer Atlas)	TCGA-62-A46Y-01	Lung Adenocarcinoma	V757M	OncoKB: Unknown, level NA;CIViC: NA;MyCancerGenome: not present;CancerHotspot: no;3DHotspot: no	MutationAssessor: impact: medium, score: 2.61;SIFT: impact: deleterious, score: 0;Polyphen-2: impact: probably_damaging, score: 1	Missense_Mutation	SNP	shallowdel		.	.	.	10	43612164	43612164	G	A	10:g.43612164G>A	ENST00000355710.3:c.2269G>A	0.1		25	224		145	35	44550
Lung Adenocarcinoma (TCGA, PanCancer Atlas)	TCGA-73-4670-01	Lung Adenocarcinoma	D460V	OncoKB: Unknown, level NA;CIViC: NA;MyCancerGenome: not present;CancerHotspot: no;3DHotspot: no	MutationAssessor: impact: medium, score: 2.52;SIFT: impact: deleterious, score: 0.05;Polyphen-2: impact: benign, score: 0.289	Missense_Mutation	SNP	gain	1	.	.	.	10	43606770	43606770	A	T	10:g.43606770A>T	ENST00000355710.3:c.1379A>T	0.28		55	141		201	331	44397
Lung Squamous Cell Carcinoma (TCGA, PanCancer Atlas)	TCGA-77-8140-01	Lung Squamous Cell Carcinoma	A756G	OncoKB: Unknown, level NA;CIViC: NA;MyCancerGenome: not present;CancerHotspot: no;3DHotspot: no	MutationAssessor: impact: high, score: 4.02;SIFT: impact: deleterious, score: 0;Polyphen-2: impact: probably_damaging, score: 0.998	Missense_Mutation	SNP	shallowdel	1	.	.	.	10	43612162	43612162	C	G	10:g.43612162C>G	ENST00000355710.3:c.2267C>G	0.35		37	69		149	340	44550
Lung Adenocarcinoma (TCGA, PanCancer Atlas)	TCGA-78-7146-01	Lung Adenocarcinoma	R77C	OncoKB: Unknown, level NA;CIViC: NA;MyCancerGenome: not present;CancerHotspot: no;3DHotspot: no	MutationAssessor: impact: medium, score: 2.615;SIFT: impact: deleterious_low_confidence, score: 0.04;Polyphen-2: impact: possibly_damaging, score: 0.844	Missense_Mutation	SNP	gain	4	.	.	.	10	43596062	43596062	C	T	10:g.43596062C>T	ENST00000355710.3:c.229C>T	0.23		12	40		27	348	44247
Lung Adenocarcinoma (TCGA, PanCancer Atlas)	TCGA-78-8662-01	Lung Adenocarcinoma	T75K	OncoKB: Unknown, level NA;CIViC: NA;MyCancerGenome: not present;CancerHotspot: no;3DHotspot: no	MutationAssessor: impact: neutral, score: 0.205;SIFT: impact: tolerated_low_confidence, score: 0.39;Polyphen-2: impact: benign, score: 0.003	Missense_Mutation	SNP	gain		.	.	.	10	43596057	43596057	C	A	10:g.43596057C>A	ENST00000355710.3:c.224C>A	0.27		16	43		97	1014	44247
Lung Squamous Cell Carcinoma (TCGA, PanCancer Atlas)	TCGA-85-A4JB-01	Lung Squamous Cell Carcinoma	G691Vfs*40	OncoKB: Unknown, level NA;CIViC: NA;MyCancerGenome: not present;CancerHotspot: no;3DHotspot: no	MutationAssessor: NA;SIFT: NA;Polyphen-2: NA	Frame_Shift_Del	DEL	diploid		.	.	.	10	43610117	43610117	C	-	10:g.43610117del	ENST00000355710.3:c.2070del	0.16		15	77		57	426	44520
Lung Squamous Cell Carcinoma (TCGA, PanCancer Atlas)	TCGA-85-A4QR-01	Lung Squamous Cell Carcinoma	T564N	OncoKB: Unknown, level NA;CIViC: NA;MyCancerGenome: not present;CancerHotspot: no;3DHotspot: no	MutationAssessor: impact: medium, score: 2.65;SIFT: impact: tolerated, score: 0.06;Polyphen-2: impact: benign, score: 0.176	Missense_Mutation	SNP	gain	1	.	.	.	10	43608343	43608343	C	A	10:g.43608343C>A	ENST00000355710.3:c.1691C>A	0.36		27	47		49	212	44459
Lung Squamous Cell Carcinoma (TCGA, PanCancer Atlas)	TCGA-85-A511-01	Lung Squamous Cell Carcinoma	E775Sfs*5	OncoKB: Unknown, level NA;CIViC: NA;MyCancerGenome: not present;CancerHotspot: no;3DHotspot: no	MutationAssessor: NA;SIFT: NA;Polyphen-2: NA	Frame_Shift_Del	DEL	gain		.	.	.	10	43613858	43613858	A	-	10:g.43613858del	ENST00000355710.3:c.2322del	0.17		7	35		23	166	13/20
Lung Adenocarcinoma (TCGA, PanCancer Atlas)	TCGA-91-6848-01	Lung Adenocarcinoma	E901K	OncoKB: Unknown, level NA;CIViC: NA;MyCancerGenome: not present;CancerHotspot: no;3DHotspot: no	MutationAssessor: impact: low, score: 1.03;SIFT: impact: deleterious, score: 0;Polyphen-2: impact: probably_damaging, score: 0.998	Missense_Mutation	SNP	diploid	2	.	.	.	10	43615622	43615622	G	A	10:g.43615622G>A	ENST00000355710.3:c.2701G>A	0.29		5	12		53	562	15/20
Lung Squamous Cell Carcinoma (TCGA, PanCancer Atlas)	TCGA-92-8063-01	Lung Squamous Cell Carcinoma	R114S	OncoKB: Unknown, level NA;CIViC: NA;MyCancerGenome: not present;CancerHotspot: no;3DHotspot: no	MutationAssessor: impact: neutral, score: -0.345;SIFT: impact: tolerated_low_confidence, score: 0.5;Polyphen-2: impact: benign, score: 0.005	Missense_Mutation	SNP	diploid	2	.	.	.	10	43597792	43597792	C	A	10:g.43597792C>A	ENST00000355710.3:c.340C>A	0.26		27	78		119	351	44275
Lung Squamous Cell Carcinoma (TCGA, PanCancer Atlas)	TCGA-98-A53I-01	Lung Squamous Cell Carcinoma	W856L	OncoKB: Unknown, level NA;CIViC: NA;MyCancerGenome: not present;CancerHotspot: no;3DHotspot: no	MutationAssessor: impact: neutral, score: -0.875;SIFT: impact: deleterious, score: 0;Polyphen-2: impact: probably_damaging, score: 0.999	Missense_Mutation	SNP	gain	1	.	.	.	10	43615153	43615153	G	T	10:g.43615153G>T	ENST00000355710.3:c.2567G>T	0.18		11	50		69	334	14/20
Lung Adenocarcinoma (TCGA, PanCancer Atlas)	TCGA-99-8025-01	Lung Adenocarcinoma	N763K	OncoKB: Unknown, level NA;CIViC: NA;MyCancerGenome: not present;CancerHotspot: no;3DHotspot: no	MutationAssessor: impact: low, score: 0.925;SIFT: impact: deleterious, score: 0.01;Polyphen-2: impact: probably_damaging, score: 0.969	Missense_Mutation	SNP	gain	1	.	.	.	10	43613825	43613825	C	A	10:g.43613825C>A	ENST00000355710.3:c.2289C>A	0.27		8	22		33	435	13/20
Lung Squamous Cell Carcinoma (TCGA, PanCancer Atlas)	TCGA-LA-A446-01	Lung Squamous Cell Carcinoma	E979Q	OncoKB: Unknown, level NA;CIViC: NA;MyCancerGenome: not present;CancerHotspot: no;3DHotspot: no	MutationAssessor: impact: low, score: 1.805;SIFT: impact: tolerated, score: 0.21;Polyphen-2: impact: probably_damaging, score: 0.998	Missense_Mutation	SNP	diploid		.	.	.	10	43619252	43619252	G	C	10:g.43619252G>C	ENST00000355710.3:c.2935G>C	0.16		12	65		90	303	17/20
Lung Squamous Cell Carcinoma (TCGA, PanCancer Atlas)	TCGA-NC-A5HN-01	Lung Squamous Cell Carcinoma	W942S	OncoKB: Unknown, level NA;CIViC: NA;MyCancerGenome: not present;CancerHotspot: no;3DHotspot: no	MutationAssessor: impact: medium, score: 2.64;SIFT: impact: deleterious, score: 0;Polyphen-2: impact: probably_damaging, score: 1	Missense_Mutation	SNP	shallowdel		.	.	.	10	43619142	43619142	G	C	10:g.43619142G>C	ENST00000355710.3:c.2825G>C	0.49		77	81		157	506	17/20
Skin Cutaneous Melanoma (TCGA, PanCancer Atlas)	TCGA-EE-A3AE-06	Cutaneous Melanoma	E62K	OncoKB: Unknown, level NA;CIViC: NA;MyCancerGenome: not present;CancerHotspot: no;3DHotspot: no	MutationAssessor: impact: medium, score: 2.85;SIFT: impact: deleterious_low_confidence, score: 0;Polyphen-2: impact: benign, score: 0.088	Missense_Mutation	SNP	shallowdel	1	.	.	.	10	43596017	43596017	G	A	10:g.43596017G>A	ENST00000355710.3:c.184G>A	0.45		18	22		81	1238	44247
Skin Cutaneous Melanoma (TCGA, PanCancer Atlas)	TCGA-ER-A19H-06	Cutaneous Melanoma	R417C	OncoKB: Unknown, level NA;CIViC: NA;MyCancerGenome: not present;CancerHotspot: no;3DHotspot: no	MutationAssessor: impact: medium, score: 2.08;SIFT: impact: tolerated, score: 0.05;Polyphen-2: impact: possibly_damaging, score: 0.711	Missense_Mutation	SNP	shallowdel	1	.	.	.	10	43604664	43604664	C	T	10:g.43604664C>T	ENST00000355710.3:c.1249C>T	0.71		12	5		22	967	44367
Breast Invasive Carcinoma (TCGA, PanCancer Atlas)	TCGA-A2-A1G4-01	Breast Invasive Ductal Carcinoma	V778I	OncoKB: Unknown, level NA;CIViC: NA;MyCancerGenome: not present;CancerHotspot: no;3DHotspot: no	MutationAssessor: impact: neutral, score: -0.535;SIFT: impact: deleterious, score: 0;Polyphen-2: impact: benign, score: 0.001	Missense_Mutation	SNP	diploid	1	.	.	.	10	43613868	43613868	G	A	10:g.43613868G>A	ENST00000355710.3:c.2332G>A	0.38		19	31		20	28	13/20
Breast Invasive Carcinoma (TCGA, PanCancer Atlas)	TCGA-A7-A4SE-01	Breast Invasive Ductal Carcinoma	L963V	OncoKB: Unknown, level NA;CIViC: NA;MyCancerGenome: not present;CancerHotspot: no;3DHotspot: no	MutationAssessor: impact: neutral, score: 0.635;SIFT: impact: deleterious, score: 0;Polyphen-2: impact: possibly_damaging, score: 0.887	Missense_Mutation	SNP	shallowdel	1	.	.	.	10	43619204	43619204	C	G	10:g.43619204C>G	ENST00000355710.3:c.2887C>G	0.18		10	47		93	92	17/20
Breast Invasive Carcinoma (TCGA, PanCancer Atlas)	TCGA-BH-A18G-01	Breast Invasive Ductal Carcinoma	S148del	OncoKB: Unknown, level NA;CIViC: NA;MyCancerGenome: not present;CancerHotspot: no;3DHotspot: no	MutationAssessor: NA;SIFT: NA;Polyphen-2: NA	In_Frame_Del	DEL	diploid		.	.	.	10	43597893	43597895	CTC	-	10:g.43597893_43597895del	ENST00000355710.3:c.443_445del	0.5		83	82		98	1249	44275
Breast Invasive Carcinoma (TCGA, PanCancer Atlas)	TCGA-D8-A1J8-01	Breast Invasive Ductal Carcinoma	L846I	OncoKB: Unknown, level NA;CIViC: NA;MyCancerGenome: not present;CancerHotspot: no;3DHotspot: no	MutationAssessor: impact: low, score: 1.01;SIFT: impact: tolerated, score: 0.2;Polyphen-2: impact: probably_damaging, score: 0.998	Missense_Mutation	SNP	shallowdel	1	.	.	.	10	43615122	43615122	C	A	10:g.43615122C>A	ENST00000355710.3:c.2536C>A	0.58		7	5		21	689	14/20
Breast Invasive Carcinoma (TCGA, PanCancer Atlas)	TCGA-D8-A1JA-01	Breast Invasive Ductal Carcinoma	I625M	OncoKB: Unknown, level NA;CIViC: NA;MyCancerGenome: not present;CancerHotspot: no;3DHotspot: no	MutationAssessor: impact: low, score: 0.895;SIFT: impact: tolerated, score: 0.24;Polyphen-2: impact: possibly_damaging, score: 0.532	Missense_Mutation	SNP	diploid	1	.	.	.	10	43609119	43609119	C	G	10:g.43609119C>G	ENST00000355710.3:c.1875C>G	0.31		5	11		20	788	44489
Colorectal Adenocarcinoma (TCGA, PanCancer Atlas)	TCGA-AZ-4315-01	Colon Adenocarcinoma	D571N	OncoKB: Unknown, level NA;CIViC: NA;MyCancerGenome: not present;CancerHotspot: no;3DHotspot: no	MutationAssessor: impact: medium, score: 2.72;SIFT: impact: deleterious, score: 0;Polyphen-2: impact: probably_damaging, score: 0.999	Missense_Mutation	SNP	diploid	1	.	.	.	10	43608363	43608363	G	A	10:g.43608363G>A	ENST00000355710.3:c.1711G>A	0.35		19	36		153	6315	44459
Stomach Adenocarcinoma (TCGA, PanCancer Atlas)	TCGA-VQ-A8P5-01	Intestinal Type Stomach Adenocarcinoma	R820H	OncoKB: Unknown, level NA;CIViC: NA;MyCancerGenome: not present;CancerHotspot: no;3DHotspot: no	MutationAssessor: impact: medium, score: 2.32;SIFT: impact: deleterious, score: 0;Polyphen-2: impact: probably_damaging, score: 0.998	Missense_Mutation	SNP	gain	1	.	.	.	10	43615045	43615045	G	A	10:g.43615045G>A	ENST00000355710.3:c.2459G>A	0.08		3	33		39	194	14/20
Uterine Corpus Endometrial Carcinoma (TCGA, PanCancer Atlas)	TCGA-AX-A2HC-01	Uterine Endometrioid Carcinoma	T225M	OncoKB: Unknown, level NA;CIViC: NA;MyCancerGenome: not present;CancerHotspot: no;3DHotspot: no	MutationAssessor: impact: low, score: 1.845;SIFT: impact: tolerated, score: 0.09;Polyphen-2: impact: benign, score: 0.336	Missense_Mutation	SNP	diploid		.	.	.	10	43600448	43600448	C	T	10:g.43600448C>T	ENST00000355710.3:c.674C>T	0.49		18	19		36	12976	44306
Pancreatic Adenocarcinoma (TCGA, PanCancer Atlas)	TCGA-IB-7888-01	Pancreatic Adenocarcinoma	R57Q	OncoKB: Unknown, level NA;CIViC: NA;MyCancerGenome: not present;CancerHotspot: no;3DHotspot: no	MutationAssessor: impact: neutral, score: 0.72;SIFT: impact: tolerated_low_confidence, score: 0.39;Polyphen-2: impact: benign, score: 0.011	Missense_Mutation	SNP	diploid		.	.	.	10	43596003	43596003	G	A	10:g.43596003G>A	ENST00000355710.3:c.170G>A	0.05		14	263		52	31	44247
Esophageal Adenocarcinoma (TCGA, PanCancer Atlas)	TCGA-L5-A4OI-01	Esophageal Adenocarcinoma	E238K	OncoKB: Unknown, level NA;CIViC: NA;MyCancerGenome: not present;CancerHotspot: no;3DHotspot: no	MutationAssessor: impact: medium, score: 2.095;SIFT: impact: tolerated, score: 0.51;Polyphen-2: impact: benign, score: 0.051	Missense_Mutation	SNP	diploid		.	.	.	10	43600486	43600486	G	A	10:g.43600486G>A	ENST00000355710.3:c.712G>A	0.41		18	26		56	1707	44306
Esophageal Adenocarcinoma (TCGA, PanCancer Atlas)	TCGA-Q9-A6FU-01	Esophageal Squamous Cell Carcinoma	D277H	OncoKB: Unknown, level NA;CIViC: NA;MyCancerGenome: not present;CancerHotspot: no;3DHotspot: no	MutationAssessor: impact: medium, score: 2.42;SIFT: impact: deleterious, score: 0.02;Polyphen-2: impact: probably_damaging, score: 0.925	Missense_Mutation	SNP	diploid		.	.	.	10	43600603	43600603	G	C	10:g.43600603G>C	ENST00000355710.3:c.829G>C	0.43		31	41		44	144	44306
Pancreatic Adenocarcinoma (TCGA, PanCancer Atlas)	TCGA-IB-7651-01	Pancreatic Adenocarcinoma	R57W	OncoKB: Unknown, level NA;CIViC: NA;MyCancerGenome: not present;CancerHotspot: no;3DHotspot: no	MutationAssessor: impact: medium, score: 2.455;SIFT: impact: deleterious_low_confidence, score: 0;Polyphen-2: impact: possibly_damaging, score: 0.903	Missense_Mutation	SNP	diploid		.	.	.	10	43596002	43596002	C	T	10:g.43596002C>T	ENST00000355710.3:c.169C>T	0.16		52	267		54	14306	44247
Prostate Adenocarcinoma (TCGA, PanCancer Atlas)	TCGA-XK-AAIW-01	Prostate Adenocarcinoma	T130I	OncoKB: Unknown, level NA;CIViC: NA;MyCancerGenome: not present;CancerHotspot: no;3DHotspot: no	MutationAssessor: impact: medium, score: 2.075;SIFT: impact: tolerated_low_confidence, score: 0.18;Polyphen-2: impact: benign, score: 0.043	Missense_Mutation	SNP	diploid		.	.	.	10	43597841	43597841	C	T	10:g.43597841C>T	ENST00000355710.3:c.389C>T	0.45		28	34		74	6234	44275
Stomach Adenocarcinoma (TCGA, PanCancer Atlas)	TCGA-B7-A5TI-01	Diffuse Type Stomach Adenocarcinoma	R313W	OncoKB: Unknown, level NA;CIViC: NA;MyCancerGenome: not present;CancerHotspot: no;3DHotspot: no	MutationAssessor: impact: medium, score: 2.44;SIFT: impact: deleterious, score: 0;Polyphen-2: impact: probably_damaging, score: 0.967	Missense_Mutation	SNP	diploid		.	.	.	10	43601893	43601893	C	T	10:g.43601893C>T	ENST00000355710.3:c.937C>T	0.23		9	31		26	551	44336
Uterine Corpus Endometrial Carcinoma (TCGA, PanCancer Atlas)	TCGA-EO-A3KX-01	Uterine Endometrioid Carcinoma	R313W	OncoKB: Unknown, level NA;CIViC: NA;MyCancerGenome: not present;CancerHotspot: no;3DHotspot: no	MutationAssessor: impact: medium, score: 2.44;SIFT: impact: deleterious, score: 0;Polyphen-2: impact: probably_damaging, score: 0.967	Missense_Mutation	SNP	diploid		.	.	.	10	43601893	43601893	C	T	10:g.43601893C>T	ENST00000355710.3:c.937C>T	0.31		18	40		30	3203	44336
Stomach Adenocarcinoma (TCGA, PanCancer Atlas)	TCGA-HU-A4H4-01	Tubular Stomach Adenocarcinoma	N950Tfs*15	OncoKB: Unknown, level NA;CIViC: NA;MyCancerGenome: not present;CancerHotspot: no;3DHotspot: no	MutationAssessor: NA;SIFT: NA;Polyphen-2: NA	Frame_Shift_Del	DEL	gain		.	.	.	10	43619164	43619164	A	-	10:g.43619164del	ENST00000355710.3:c.2849del	0.1		17	151		174	579	17/20
Sarcoma (TCGA, PanCancer Atlas)	TCGA-DX-AB2X-01	Undifferentiated Pleomorphic Sarcoma/Malignant Fibrous Histiocytoma/High-Grade Spindle Cell Sarcoma	S859*	OncoKB: Unknown, level NA;CIViC: NA;MyCancerGenome: not present;CancerHotspot: no;3DHotspot: no	MutationAssessor: NA;SIFT: NA;Polyphen-2: NA	Nonsense_Mutation	SNP	gain		.	.	.	10	43615162	43615162	C	A	10:g.43615162C>A	ENST00000355710.3:c.2576C>A	0.35		8	15		67	42	14/20
Colorectal Adenocarcinoma (TCGA, PanCancer Atlas)	TCGA-AA-A010-01	Colon Adenocarcinoma	A756V	OncoKB: Unknown, level NA;CIViC: NA;MyCancerGenome: not present;CancerHotspot: no;3DHotspot: no	MutationAssessor: impact: medium, score: 2.585;SIFT: impact: deleterious, score: 0;Polyphen-2: impact: probably_damaging, score: 0.999	Missense_Mutation	SNP	diploid	1	.	.	.	10	43612162	43612162	C	T	10:g.43612162C>T	ENST00000355710.3:c.2267C>T	0.34		48	92		175	7496	44550
Ovarian Serous Cystadenocarcinoma (TCGA, PanCancer Atlas)	TCGA-13-2060-01	Serous Ovarian Cancer	T636M	OncoKB: Unknown, level NA;CIViC: NA;MyCancerGenome: not present;CancerHotspot: no;3DHotspot: no	MutationAssessor: impact: low, score: 1.82;SIFT: impact: tolerated, score: 0.16;Polyphen-2: impact: benign, score: 0.33	Missense_Mutation	SNP	shallowdel	1	.	.	.	10	43609955	43609955	C	T	10:g.43609955C>T	ENST00000355710.3:c.1907C>T	0.26	0.02	7	20	1	51	66	44520
Uterine Corpus Endometrial Carcinoma (TCGA, PanCancer Atlas)	TCGA-AJ-A3BH-01	Uterine Endometrioid Carcinoma	T317M	OncoKB: Unknown, level NA;CIViC: NA;MyCancerGenome: not present;CancerHotspot: no;3DHotspot: no	MutationAssessor: impact: medium, score: 2.645;SIFT: impact: deleterious, score: 0.02;Polyphen-2: impact: probably_damaging, score: 1	Missense_Mutation	SNP	diploid		.	.	.	10	43601906	43601906	C	T	10:g.43601906C>T	ENST00000355710.3:c.950C>T	0.13		5	35		51	2677	44336
Colorectal Adenocarcinoma (TCGA, PanCancer Atlas)	TCGA-AA-3947-01	Mucinous Adenocarcinoma of the Colon and Rectum	L356=	OncoKB: Unknown, level NA;CIViC: NA;MyCancerGenome: not present;CancerHotspot: no;3DHotspot: no	MutationAssessor: NA;SIFT: NA;Polyphen-2: NA	Splice_Region	SNP	diploid		.	.	.	10	43604481	43604481	C	T	10:g.43604481C>T	ENST00000355710.3:c.1066C>T	0.18		3	14		35	2295	44367
Uterine Corpus Endometrial Carcinoma (TCGA, PanCancer Atlas)	TCGA-A5-A2K5-01	Uterine Endometrioid Carcinoma	A1019V	OncoKB: Unknown, level NA;CIViC: NA;MyCancerGenome: not present;CancerHotspot: no;3DHotspot: no	MutationAssessor: impact: neutral, score: 0.695;SIFT: impact: deleterious, score: 0.03;Polyphen-2: impact: probably_damaging, score: 0.999	Missense_Mutation	SNP	diploid		.	.	.	10	43622039	43622039	C	T	10:g.43622039C>T	ENST00000355710.3:c.3056C>T	0.13		5	34		39	8509	19/20
Uveal Melanoma (TCGA, PanCancer Atlas)	TCGA-YZ-A985-01	Uveal Melanoma	R177Q	OncoKB: Unknown, level NA;CIViC: NA;MyCancerGenome: not present;CancerHotspot: no;3DHotspot: no	MutationAssessor: impact: medium, score: 2.47;SIFT: impact: tolerated, score: 0.21;Polyphen-2: impact: possibly_damaging, score: 0.843	Missense_Mutation	SNP	diploid	1	.	.	.	10	43597982	43597982	G	A	10:g.43597982G>A	ENST00000355710.3:c.530G>A	0.12		4	29		38	388	44275
Cholangiocarcinoma (TCGA, PanCancer Atlas)	TCGA-W5-AA39-01	Intrahepatic Cholangiocarcinoma	A294V	OncoKB: Unknown, level NA;CIViC: NA;MyCancerGenome: not present;CancerHotspot: no;3DHotspot: no	MutationAssessor: impact: medium, score: 2.47;SIFT: impact: tolerated, score: 0.1;Polyphen-2: impact: possibly_damaging, score: 0.653	Missense_Mutation	SNP	diploid		.	.	.	10	43601837	43601837	C	T	10:g.43601837C>T	ENST00000355710.3:c.881C>T	0.47		9	10		46	653	44336
Colorectal Adenocarcinoma (TCGA, PanCancer Atlas)	TCGA-AD-6548-01	Colon Adenocarcinoma	R133H	OncoKB: Unknown, level NA;CIViC: NA;MyCancerGenome: not present;CancerHotspot: no;3DHotspot: no	MutationAssessor: impact: medium, score: 2.44;SIFT: impact: tolerated_low_confidence, score: 0.08;Polyphen-2: impact: possibly_damaging, score: 0.666	Missense_Mutation	SNP	diploid	2	.	.	.	10	43597850	43597850	G	A	10:g.43597850G>A	ENST00000355710.3:c.398G>A	0.3		12	28		29	119	44275
Glioblastoma Multiforme (TCGA, PanCancer Atlas)	TCGA-41-2575-01	Glioblastoma Multiforme	R133H	OncoKB: Unknown, level NA;CIViC: NA;MyCancerGenome: not present;CancerHotspot: no;3DHotspot: no	MutationAssessor: impact: medium, score: 2.44;SIFT: impact: tolerated_low_confidence, score: 0.08;Polyphen-2: impact: possibly_damaging, score: 0.666	Missense_Mutation	SNP	shallowdel	2	.	.	.	10	43597850	43597850	G	A	10:g.43597850G>A	ENST00000355710.3:c.398G>A	0.08		6	71		112	58	44275
Head and Neck Squamous Cell Carcinoma (TCGA, PanCancer Atlas)	TCGA-F7-A624-01	Head and Neck Squamous Cell Carcinoma	N84S	OncoKB: Unknown, level NA;CIViC: NA;MyCancerGenome: not present;CancerHotspot: no;3DHotspot: no	MutationAssessor: impact: neutral, score: 0.14;SIFT: impact: tolerated_low_confidence, score: 0.9;Polyphen-2: impact: benign, score: 0	Missense_Mutation	SNP	diploid		.	.	.	10	43596084	43596084	A	G	10:g.43596084A>G	ENST00000355710.3:c.251A>G	0.24		8	26		42	2744	44247
Head and Neck Squamous Cell Carcinoma (TCGA, PanCancer Atlas)	TCGA-D6-A6EP-01	Head and Neck Squamous Cell Carcinoma	V63M	OncoKB: Unknown, level NA;CIViC: NA;MyCancerGenome: not present;CancerHotspot: no;3DHotspot: no	MutationAssessor: impact: medium, score: 2.585;SIFT: impact: tolerated_low_confidence, score: 0.05;Polyphen-2: impact: benign, score: 0.149	Missense_Mutation	SNP	shallowdel		.	.	.	10	43596020	43596020	G	A	10:g.43596020G>A	ENST00000355710.3:c.187G>A	0.21		7	26		46	106	44247
Head and Neck Squamous Cell Carcinoma (TCGA, PanCancer Atlas)	TCGA-UF-A7JF-01	Head and Neck Squamous Cell Carcinoma	Y483D	OncoKB: Unknown, level NA;CIViC: NA;MyCancerGenome: not present;CancerHotspot: no;3DHotspot: no	MutationAssessor: impact: medium, score: 2.515;SIFT: impact: deleterious, score: 0.03;Polyphen-2: impact: possibly_damaging, score: 0.807	Missense_Mutation	SNP	diploid		.	.	.	10	43606838	43606838	T	G	10:g.43606838T>G	ENST00000355710.3:c.1447T>G	0.35		33	62		82	89	44397
Head and Neck Squamous Cell Carcinoma (TCGA, PanCancer Atlas)	TCGA-BB-A5HY-01	Head and Neck Squamous Cell Carcinoma	E284Q	OncoKB: Unknown, level NA;CIViC: NA;MyCancerGenome: not present;CancerHotspot: no;3DHotspot: no	MutationAssessor: impact: medium, score: 2.32;SIFT: impact: tolerated, score: 0.07;Polyphen-2: impact: benign, score: 0.206	Missense_Mutation	SNP	shallowdel		.	.	.	10	43600624	43600624	G	C	10:g.43600624G>C	ENST00000355710.3:c.850G>C	0.27		11	30		75	187	44306
Colorectal Adenocarcinoma (TCGA, PanCancer Atlas)	TCGA-AA-3663-01	Colon Adenocarcinoma	X550_splice	OncoKB: Unknown, level NA;CIViC: NA;MyCancerGenome: not present;CancerHotspot: no;3DHotspot: no	MutationAssessor: impact: , score: undefined;SIFT: NA;Polyphen-2: NA	Splice_Site	SNP	diploid		.	.	.	10	43608300	43608300	G	T	10:g.43608300G>T	ENST00000355710.3:c.1649-1G>T	0.08		9	107		36	1937
Uterine Corpus Endometrial Carcinoma (TCGA, PanCancer Atlas)	TCGA-A5-A0G2-01	Uterine Serous Carcinoma/Uterine Papillary Serous Carcinoma	R982H	OncoKB: Unknown, level NA;CIViC: NA;MyCancerGenome: not present;CancerHotspot: no;3DHotspot: no	MutationAssessor: impact: low, score: 0.905;SIFT: impact: tolerated, score: 0.12;Polyphen-2: impact: benign, score: 0.345	Missense_Mutation	SNP	diploid	3	.	.	.	10	43620336	43620336	G	A	10:g.43620336G>A	ENST00000355710.3:c.2945G>A	0.39		12	19		35	25711	18/20
Uterine Corpus Endometrial Carcinoma (TCGA, PanCancer Atlas)	TCGA-BG-A222-01	Uterine Endometrioid Carcinoma	R982H	OncoKB: Unknown, level NA;CIViC: NA;MyCancerGenome: not present;CancerHotspot: no;3DHotspot: no	MutationAssessor: impact: low, score: 0.905;SIFT: impact: tolerated, score: 0.12;Polyphen-2: impact: benign, score: 0.345	Missense_Mutation	SNP	diploid	3	.	.	.	10	43620336	43620336	G	A	10:g.43620336G>A	ENST00000355710.3:c.2945G>A	0.3		11	26		40	4274	18/20
Brain Lower Grade Glioma (TCGA, PanCancer Atlas)	TCGA-TM-A7CA-01	Astrocytoma	A807T	OncoKB: Unknown, level NA;CIViC: NA;MyCancerGenome: not present;CancerHotspot: no;3DHotspot: no	MutationAssessor: impact: medium, score: 2.185;SIFT: impact: deleterious, score: 0;Polyphen-2: impact: probably_damaging, score: 0.952	Missense_Mutation	SNP	diploid		.	.	.	10	43615005	43615005	G	A	10:g.43615005G>A	ENST00000355710.3:c.2419G>A	0.33		8	16		22	35	14/20
Liver Hepatocellular Carcinoma (TCGA, PanCancer Atlas)	TCGA-DD-A4NV-01	Hepatocellular Carcinoma	Y204C	OncoKB: Unknown, level NA;CIViC: NA;MyCancerGenome: not present;CancerHotspot: no;3DHotspot: no	MutationAssessor: impact: medium, score: 2.35;SIFT: impact: deleterious, score: 0;Polyphen-2: impact: probably_damaging, score: 0.987	Missense_Mutation	SNP	gain		.	.	.	10	43598063	43598063	A	G	10:g.43598063A>G	ENST00000355710.3:c.611A>G	0.16		5	27		61	126	44275
Pancreatic Adenocarcinoma (TCGA, PanCancer Atlas)	TCGA-IB-7651-01	Pancreatic Adenocarcinoma	F329L	OncoKB: Unknown, level NA;CIViC: NA;MyCancerGenome: not present;CancerHotspot: no;3DHotspot: no	MutationAssessor: impact: medium, score: 2.67;SIFT: impact: tolerated, score: 0.12;Polyphen-2: impact: probably_damaging, score: 0.997	Missense_Mutation	SNP	diploid		.	.	.	10	43601943	43601943	C	A	10:g.43601943C>A	ENST00000355710.3:c.987C>A	0.11		17	143		24	14306	44336
Pancreatic Adenocarcinoma (TCGA, PanCancer Atlas)	TCGA-IB-7651-01	Pancreatic Adenocarcinoma	A756D	OncoKB: Unknown, level NA;CIViC: NA;MyCancerGenome: not present;CancerHotspot: no;3DHotspot: no	MutationAssessor: impact: high, score: 3.82;SIFT: impact: deleterious, score: 0;Polyphen-2: impact: probably_damaging, score: 1	Missense_Mutation	SNP	diploid	1	.	.	.	10	43612162	43612162	C	A	10:g.43612162C>A	ENST00000355710.3:c.2267C>A	0.04		32	834		176	14306	44550
Pancreatic Adenocarcinoma (TCGA, PanCancer Atlas)	TCGA-IB-7651-01	Pancreatic Adenocarcinoma	P1070S	OncoKB: Unknown, level NA;CIViC: NA;MyCancerGenome: not present;CancerHotspot: no;3DHotspot: no	MutationAssessor: impact: neutral, score: 0.205;SIFT: NA;Polyphen-2: NA	Missense_Mutation	SNP	diploid		.	.	.	10	43623580	43623580	C	T	10:g.43623580C>T	ENST00000355710.3:c.3208C>T	0.16		138	706		225	14306	20/20
Pheochromocytoma and Paraganglioma (TCGA, PanCancer Atlas)	TCGA-SP-A6QK-01	Pheochromocytoma	C515S	OncoKB: Unknown, level NA;CIViC: NA;MyCancerGenome: not present;CancerHotspot: no;3DHotspot: no	MutationAssessor: impact: medium, score: 2.595;SIFT: impact: tolerated, score: 0.32;Polyphen-2: impact: possibly_damaging, score: 0.501	Missense_Mutation	SNP	diploid		.	.	.	10	43607567	43607567	T	A	10:g.43607567T>A	ENST00000355710.3:c.1543T>A	0.35		6	11		10	8	44428
Uterine Corpus Endometrial Carcinoma (TCGA, PanCancer Atlas)	TCGA-AJ-A3BH-01	Uterine Endometrioid Carcinoma	R348Q	OncoKB: Unknown, level NA;CIViC: NA;MyCancerGenome: not present;CancerHotspot: no;3DHotspot: no	MutationAssessor: impact: medium, score: 2.67;SIFT: impact: tolerated, score: 0.09;Polyphen-2: impact: probably_damaging, score: 0.999	Missense_Mutation	SNP	diploid		.	.	.	10	43601999	43601999	G	A	10:g.43601999G>A	ENST00000355710.3:c.1043G>A	0.31		12	27		53	2677	44336
Sarcoma (TCGA, PanCancer Atlas)	TCGA-DX-A8BH-01	Undifferentiated Pleomorphic Sarcoma/Malignant Fibrous Histiocytoma/High-Grade Spindle Cell Sarcoma	G894S	OncoKB: Unknown, level NA;CIViC: NA;MyCancerGenome: not present;CancerHotspot: no;3DHotspot: no	MutationAssessor: impact: medium, score: 3.5;SIFT: impact: deleterious, score: 0;Polyphen-2: impact: probably_damaging, score: 1	Missense_Mutation	SNP	shallowdel	1	.	.	.	10	43615601	43615601	G	A	10:g.43615601G>A	ENST00000355710.3:c.2680G>A	0.1		3	28		27	60	15/20
Uterine Corpus Endometrial Carcinoma (TCGA, PanCancer Atlas)	TCGA-EO-A22X-01	Uterine Endometrioid Carcinoma	R912W	OncoKB: Unknown, level NA;CIViC: NA;MyCancerGenome: not present;CancerHotspot: no;3DHotspot: no	MutationAssessor: impact: medium, score: 2.16;SIFT: impact: deleterious, score: 0;Polyphen-2: impact: probably_damaging, score: 1	Missense_Mutation	SNP	diploid	3	.	.	.	10	43617397	43617397	C	T	10:g.43617397C>T	ENST00000355710.3:c.2734C>T	0.29		18	45		71	9429	16/20
Colorectal Adenocarcinoma (TCGA, PanCancer Atlas)	TCGA-EI-6917-01	Rectal Adenocarcinoma	R912W	OncoKB: Unknown, level NA;CIViC: NA;MyCancerGenome: not present;CancerHotspot: no;3DHotspot: no	MutationAssessor: impact: medium, score: 2.16;SIFT: impact: deleterious, score: 0;Polyphen-2: impact: probably_damaging, score: 1	Missense_Mutation	SNP	diploid	3	.	.	.	10	43617397	43617397	C	T	10:g.43617397C>T	ENST00000355710.3:c.2734C>T	0.29		23	56		123	4930	16/20
Lung Adenocarcinoma (TCGA, PanCancer Atlas)	TCGA-17-Z041-01	Lung Adenocarcinoma	D290N	OncoKB: Unknown, level NA;CIViC: NA;MyCancerGenome: not present;CancerHotspot: no;3DHotspot: no	MutationAssessor: impact: neutral, score: 0;SIFT: impact: tolerated, score: 0.06;Polyphen-2: impact: benign, score: 0.102	Missense_Mutation	SNP			.	.	.	10	43601824	43601824	G	A	10:g.43601824G>A	ENST00000355710.3:c.868G>A	0.25		11	33		26	63	44336
Uterine Corpus Endometrial Carcinoma (TCGA, PanCancer Atlas)	TCGA-AP-A1DV-01	Uterine Endometrioid Carcinoma	R133C	OncoKB: Unknown, level NA;CIViC: NA;MyCancerGenome: not present;CancerHotspot: no;3DHotspot: no	MutationAssessor: impact: medium, score: 2.44;SIFT: impact: deleterious_low_confidence, score: 0.01;Polyphen-2: impact: possibly_damaging, score: 0.799	Missense_Mutation	SNP	diploid	2	.	.	.	10	43597849	43597849	C	T	10:g.43597849C>T	ENST00000355710.3:c.397C>T	0.37		18	31		64	12063	44275
Glioblastoma Multiforme (TCGA, PanCancer Atlas)	TCGA-19-5956-01	Glioblastoma Multiforme	R133C	OncoKB: Unknown, level NA;CIViC: NA;MyCancerGenome: not present;CancerHotspot: no;3DHotspot: no	MutationAssessor: impact: medium, score: 2.44;SIFT: impact: deleterious_low_confidence, score: 0.01;Polyphen-2: impact: possibly_damaging, score: 0.799	Missense_Mutation	SNP	diploid	2	.	.	.	10	43597849	43597849	C	T	10:g.43597849C>T	ENST00000355710.3:c.397C>T	0.17		13	65		103	6908	44275
Bladder Urothelial Carcinoma (TCGA, PanCancer Atlas)	TCGA-FD-A5BZ-01	Bladder Urothelial Carcinoma	V245A	OncoKB: Unknown, level NA;CIViC: NA;MyCancerGenome: not present;CancerHotspot: no;3DHotspot: no	MutationAssessor: impact: medium, score: 2.65;SIFT: impact: deleterious, score: 0.03;Polyphen-2: impact: benign, score: 0.251	Missense_Mutation	SNP	gain		.	.	.	10	43600508	43600508	T	C	10:g.43600508T>C	ENST00000355710.3:c.734T>C	0.1		4	35		39	109	44306
Bladder Urothelial Carcinoma (TCGA, PanCancer Atlas)	TCGA-LT-A5Z6-01	Bladder Urothelial Carcinoma	E673K	OncoKB: Unknown, level NA;CIViC: NA;MyCancerGenome: not present;CancerHotspot: no;3DHotspot: no	MutationAssessor: impact: low, score: 1.495;SIFT: impact: tolerated, score: 0.27;Polyphen-2: impact: probably_damaging, score: 0.999	Missense_Mutation	SNP	shallowdel		.	.	.	10	43610065	43610065	G	A	10:g.43610065G>A	ENST00000355710.3:c.2017G>A	0.22		17	59		132	459	44520
Bladder Urothelial Carcinoma (TCGA, PanCancer Atlas)	TCGA-UY-A78K-01	Bladder Urothelial Carcinoma	N1059D	OncoKB: Unknown, level NA;CIViC: NA;MyCancerGenome: not present;CancerHotspot: no;3DHotspot: no	MutationAssessor: impact: neutral, score: 0.695;SIFT: impact: deleterious_low_confidence, score: 0;Polyphen-2: impact: probably_damaging, score: 0.999	Missense_Mutation	SNP	diploid		.	.	.	10	43622158	43622158	A	G	10:g.43622158A>G	ENST00000355710.3:c.3175A>G	0.12		11	81		54	771	19/20
Bladder Urothelial Carcinoma (TCGA, PanCancer Atlas)	TCGA-UY-A78N-01	Bladder Urothelial Carcinoma	F998L	OncoKB: Unknown, level NA;CIViC: NA;MyCancerGenome: not present;CancerHotspot: no;3DHotspot: no	MutationAssessor: impact: medium, score: 2.365;SIFT: impact: deleterious, score: 0;Polyphen-2: impact: probably_damaging, score: 0.998	Missense_Mutation	SNP	gain		.	.	.	10	43620383	43620383	T	C	10:g.43620383T>C	ENST00000355710.3:c.2992T>C	0.58		33	24		59	266	18/20
Skin Cutaneous Melanoma (TCGA, PanCancer Atlas)	TCGA-FW-A3TV-06	Cutaneous Melanoma	D698N	OncoKB: Unknown, level NA;CIViC: NA;MyCancerGenome: not present;CancerHotspot: no;3DHotspot: no	MutationAssessor: impact: low, score: 1.385;SIFT: impact: deleterious, score: 0.02;Polyphen-2: impact: probably_damaging, score: 0.981	Missense_Mutation	SNP	shallowdel	1	.	.	.	10	43610140	43610140	G	A	10:g.43610140G>A	ENST00000355710.3:c.2092G>A	0.3		6	14		60	273	44520
Skin Cutaneous Melanoma (TCGA, PanCancer Atlas)	TCGA-EE-A2GI-06	Cutaneous Melanoma	L1108*	OncoKB: Unknown, level NA;CIViC: NA;MyCancerGenome: not present;CancerHotspot: no;3DHotspot: no	MutationAssessor: NA;SIFT: NA;Polyphen-2: NA	Nonsense_Mutation	SNP	shallowdel	1	.	.	.	10	43623695	43623695	T	A	10:g.43623695T>A	ENST00000355710.3:c.3323T>A	0.09		6	60		75	1564	20/20
Skin Cutaneous Melanoma (TCGA, PanCancer Atlas)	TCGA-FS-A1ZQ-06	Cutaneous Melanoma	L481R	OncoKB: Unknown, level NA;CIViC: NA;MyCancerGenome: not present;CancerHotspot: no;3DHotspot: no	MutationAssessor: impact: medium, score: 2.62;SIFT: impact: deleterious, score: 0;Polyphen-2: impact: possibly_damaging, score: 0.889	Missense_Mutation	SNP	shallowdel	1	.	.	.	10	43606833	43606833	T	G	10:g.43606833T>G	ENST00000355710.3:c.1442T>G	0.16		4	21		43	1132	44397
Skin Cutaneous Melanoma (TCGA, PanCancer Atlas)	TCGA-EE-A2A2-06	Cutaneous Melanoma	G823E	OncoKB: Unknown, level NA;CIViC: NA;MyCancerGenome: not present;CancerHotspot: no;3DHotspot: no	MutationAssessor: impact: neutral, score: 0.515;SIFT: impact: tolerated, score: 0.19;Polyphen-2: impact: probably_damaging, score: 1	Missense_Mutation	SNP	shallowdel	2	.	.	.	10	43615054	43615054	G	A	10:g.43615054G>A	ENST00000355710.3:c.2468G>A	0.4		121	179		30	1303	14/20
Skin Cutaneous Melanoma (TCGA, PanCancer Atlas)	TCGA-QB-A6FS-06	Cutaneous Melanoma	G823E	OncoKB: Unknown, level NA;CIViC: NA;MyCancerGenome: not present;CancerHotspot: no;3DHotspot: no	MutationAssessor: impact: neutral, score: 0.515;SIFT: impact: tolerated, score: 0.19;Polyphen-2: impact: probably_damaging, score: 1	Missense_Mutation	SNP	diploid	2	.	.	.	10	43615054	43615054	G	A	10:g.43615054G>A	ENST00000355710.3:c.2468G>A	0.24		11	35		41	965	14/20
Skin Cutaneous Melanoma (TCGA, PanCancer Atlas)	TCGA-EE-A2A2-06	Cutaneous Melanoma	R912Q	OncoKB: Unknown, level NA;CIViC: NA;MyCancerGenome: not present;CancerHotspot: no;3DHotspot: no	MutationAssessor: impact: low, score: 0.95;SIFT: impact: deleterious, score: 0;Polyphen-2: impact: probably_damaging, score: 0.999	Missense_Mutation	SNP	shallowdel	3	.	.	.	10	43617398	43617398	G	A	10:g.43617398G>A	ENST00000355710.3:c.2735G>A	0.3		288	686		118	1303	16/20
Skin Cutaneous Melanoma (TCGA, PanCancer Atlas)	TCGA-EE-A2GD-06	Cutaneous Melanoma	D627N	OncoKB: Unknown, level NA;CIViC: NA;MyCancerGenome: not present;CancerHotspot: no;3DHotspot: no	MutationAssessor: impact: low, score: 1.59;SIFT: impact: tolerated, score: 0.37;Polyphen-2: impact: benign, score: 0.208	Missense_Mutation	SNP	shallowdel	1	.	.	.	10	43609123	43609123	G	A	10:g.43609123G>A	ENST00000355710.3:c.1879G>A	0.35		6	11		22	481	44489
Skin Cutaneous Melanoma (TCGA, PanCancer Atlas)	TCGA-EE-A29D-06	Cutaneous Melanoma	A472V	OncoKB: Unknown, level NA;CIViC: NA;MyCancerGenome: not present;CancerHotspot: no;3DHotspot: no	MutationAssessor: impact: low, score: 0.83;SIFT: impact: tolerated, score: 0.44;Polyphen-2: impact: benign, score: 0.007	Missense_Mutation	SNP	gain	1	.	.	.	10	43606806	43606806	C	T	10:g.43606806C>T	ENST00000355710.3:c.1415C>T	0.16		16	82		78	3093	44397
Skin Cutaneous Melanoma (TCGA, PanCancer Atlas)	TCGA-EE-A29D-06	Cutaneous Melanoma	V685I	OncoKB: Unknown, level NA;CIViC: NA;MyCancerGenome: not present;CancerHotspot: no;3DHotspot: no	MutationAssessor: impact: neutral, score: -0.145;SIFT: impact: tolerated, score: 1;Polyphen-2: impact: benign, score: 0.007	Missense_Mutation	SNP	gain	1	.	.	.	10	43610101	43610101	G	A	10:g.43610101G>A	ENST00000355710.3:c.2053G>A	0.23		17	56		58	3093	44520
Skin Cutaneous Melanoma (TCGA, PanCancer Atlas)	TCGA-EE-A2MR-06	Cutaneous Melanoma	X290_splice	OncoKB: Unknown, level NA;CIViC: NA;MyCancerGenome: not present;CancerHotspot: no;3DHotspot: no	MutationAssessor: impact: , score: undefined;SIFT: NA;Polyphen-2: NA	Splice_Site	SNP	diploid		.	.	.	10	43601823	43601823	G	A	10:g.43601823G>A	ENST00000355710.3:c.868-1G>A	0.17		6	30		33	2920
Skin Cutaneous Melanoma (TCGA, PanCancer Atlas)	TCGA-EE-A2MR-06	Cutaneous Melanoma	G736R	OncoKB: Unknown, level NA;CIViC: NA;MyCancerGenome: not present;CancerHotspot: no;3DHotspot: no	MutationAssessor: impact: high, score: 4.63;SIFT: impact: deleterious, score: 0;Polyphen-2: impact: probably_damaging, score: 1	Missense_Mutation	SNP	diploid	1	.	.	.	10	43612101	43612101	G	A	10:g.43612101G>A	ENST00000355710.3:c.2206G>A	0.1		20	179		202	2920	44550
Skin Cutaneous Melanoma (TCGA, PanCancer Atlas)	TCGA-EE-A2MR-06	Cutaneous Melanoma	A342V	OncoKB: Unknown, level NA;CIViC: NA;MyCancerGenome: not present;CancerHotspot: no;3DHotspot: no	MutationAssessor: impact: low, score: 1.39;SIFT: impact: tolerated, score: 0.31;Polyphen-2: impact: benign, score: 0.003	Missense_Mutation	SNP	diploid	1	.	.	.	10	43601981	43601981	C	T	10:g.43601981C>T	ENST00000355710.3:c.1025C>T	0.17		6	29		29	2920	44336
Skin Cutaneous Melanoma (TCGA, PanCancer Atlas)	TCGA-EB-A5UN-06	Cutaneous Melanoma	G1032D	OncoKB: Unknown, level NA;CIViC: NA;MyCancerGenome: not present;CancerHotspot: no;3DHotspot: no	MutationAssessor: impact: neutral, score: 0.55;SIFT: impact: deleterious_low_confidence, score: 0;Polyphen-2: impact: possibly_damaging, score: 0.736	Missense_Mutation	SNP	shallowdel	1	.	.	.	10	43622078	43622078	G	A	10:g.43622078G>A	ENST00000355710.3:c.3095G>A	0.25	0.0052	50	147	1	191	627	19/20
Skin Cutaneous Melanoma (TCGA, PanCancer Atlas)	TCGA-EE-A183-06	Cutaneous Melanoma	S936F	OncoKB: Unknown, level NA;CIViC: NA;MyCancerGenome: not present;CancerHotspot: no;3DHotspot: no	MutationAssessor: impact: high, score: 4.55;SIFT: impact: deleterious, score: 0;Polyphen-2: impact: probably_damaging, score: 1	Missense_Mutation	SNP	diploid	1	.	.	.	10	43619124	43619124	C	T	10:g.43619124C>T	ENST00000355710.3:c.2807C>T	0.11		11	90		200	2156	17/20
Skin Cutaneous Melanoma (TCGA, PanCancer Atlas)	TCGA-EE-A29R-06	Cutaneous Melanoma	A741T	OncoKB: Unknown, level NA;CIViC: NA;MyCancerGenome: not present;CancerHotspot: no;3DHotspot: no	MutationAssessor: impact: medium, score: 2.695;SIFT: impact: deleterious, score: 0;Polyphen-2: impact: probably_damaging, score: 0.999	Missense_Mutation	SNP	diploid	1	.	.	.	10	43612116	43612116	G	A	10:g.43612116G>A	ENST00000355710.3:c.2221G>A	0.4		71	105		171	551	44550
Skin Cutaneous Melanoma (TCGA, PanCancer Atlas)	TCGA-FW-A3R5-06	Cutaneous Melanoma	W85*	OncoKB: Unknown, level NA;CIViC: NA;MyCancerGenome: not present;CancerHotspot: no;3DHotspot: no	MutationAssessor: NA;SIFT: NA;Polyphen-2: NA	Nonsense_Mutation	SNP	diploid	1	.	.	.	10	43596087	43596087	G	A	10:g.43596087G>A	ENST00000355710.3:c.254G>A	0.19		7	29		47	15825	44247
Adrenocortical Carcinoma (TCGA, PanCancer Atlas)	TCGA-OR-A5KB-01	Adrenocortical Carcinoma	G597V	OncoKB: Unknown, level NA;CIViC: NA;MyCancerGenome: not present;CancerHotspot: no;3DHotspot: no	MutationAssessor: impact: medium, score: 2.65;SIFT: impact: deleterious, score: 0.01;Polyphen-2: impact: probably_damaging, score: 1	Missense_Mutation	SNP	gain		.	.	.	10	43609034	43609034	G	T	10:g.43609034G>T	ENST00000355710.3:c.1790G>T	0.44		12	15		19	1859	44489
Adrenocortical Carcinoma (TCGA, PanCancer Atlas)	TCGA-OR-A5J4-01	Adrenocortical Carcinoma	V425A	OncoKB: Unknown, level NA;CIViC: NA;MyCancerGenome: not present;CancerHotspot: no;3DHotspot: no	MutationAssessor: impact: medium, score: 2.585;SIFT: impact: tolerated, score: 0.18;Polyphen-2: impact: possibly_damaging, score: 0.775	Missense_Mutation	SNP	gain		.	.	.	10	43606665	43606665	T	C	10:g.43606665T>C	ENST00000355710.3:c.1274T>C	0.26		24	67		72	116	44397
Skin Cutaneous Melanoma (TCGA, PanCancer Atlas)	TCGA-FR-A3R1-01	Cutaneous Melanoma	D322N	OncoKB: Unknown, level NA;CIViC: NA;MyCancerGenome: not present;CancerHotspot: no;3DHotspot: no	MutationAssessor: impact: medium, score: 2.3;SIFT: impact: tolerated, score: 0.14;Polyphen-2: impact: probably_damaging, score: 0.937	Missense_Mutation	SNP		1	.	.	.	10	43601920	43601920	G	A	10:g.43601920G>A	ENST00000355710.3:c.964G>A	0.31		15	34		19	333	44336
Skin Cutaneous Melanoma (TCGA, PanCancer Atlas)	TCGA-EB-A430-01	Cutaneous Melanoma	T92I	OncoKB: Unknown, level NA;CIViC: NA;MyCancerGenome: not present;CancerHotspot: no;3DHotspot: no	MutationAssessor: impact: medium, score: 2.72;SIFT: impact: deleterious_low_confidence, score: 0;Polyphen-2: impact: possibly_damaging, score: 0.481	Missense_Mutation	SNP		1	.	.	.	10	43596108	43596108	C	T	10:g.43596108C>T	ENST00000355710.3:c.275C>T	0.39		11	17		29	343	44247
Liver Hepatocellular Carcinoma (TCGA, PanCancer Atlas)	TCGA-ZP-A9D4-01	Hepatocellular Carcinoma	R587=	OncoKB: Unknown, level NA;CIViC: NA;MyCancerGenome: not present;CancerHotspot: no;3DHotspot: no	MutationAssessor: NA;SIFT: NA;Polyphen-2: NA	Splice_Region	SNP	diploid		.	.	.	10	43609005	43609005	G	A	10:g.43609005G>A	ENST00000355710.3:c.1761G>A	0.53		16	14		21	61	44489
Lung Squamous Cell Carcinoma (TCGA, PanCancer Atlas)	TCGA-NC-A5HJ-01	Lung Squamous Cell Carcinoma	V934=	OncoKB: Unknown, level NA;CIViC: NA;MyCancerGenome: not present;CancerHotspot: no;3DHotspot: no	MutationAssessor: NA;SIFT: NA;Polyphen-2: NA	Splice_Region	SNP	diploid		.	.	.	10	43619119	43619119	A	T	10:g.43619119A>T	ENST00000355710.3:c.2802A>T	0.06		10	163		194	370	17/20
Skin Cutaneous Melanoma (TCGA, PanCancer Atlas)	TCGA-FR-A726-01	Cutaneous Melanoma	P1049S	OncoKB: Unknown, level NA;CIViC: NA;MyCancerGenome: not present;CancerHotspot: no;3DHotspot: no	MutationAssessor: impact: neutral, score: 0.695;SIFT: impact: tolerated_low_confidence, score: 0.06;Polyphen-2: impact: probably_damaging, score: 0.999	Missense_Mutation	SNP			.	.	.	10	43622128	43622128	C	T	10:g.43622128C>T	ENST00000355710.3:c.3145C>T	0.45		66	81		142	5858	19/20
Uterine Corpus Endometrial Carcinoma (TCGA, PanCancer Atlas)	TCGA-DF-A2KU-01	Uterine Endometrioid Carcinoma	A487V	OncoKB: Unknown, level NA;CIViC: NA;MyCancerGenome: not present;CancerHotspot: no;3DHotspot: no	MutationAssessor: impact: medium, score: 2.275;SIFT: impact: tolerated, score: 0.12;Polyphen-2: impact: possibly_damaging, score: 0.471	Missense_Mutation	SNP	diploid		.	.	.	10	43606851	43606851	C	T	10:g.43606851C>T	ENST00000355710.3:c.1460C>T	0.36		13	23		14	10052	44397
Uterine Corpus Endometrial Carcinoma (TCGA, PanCancer Atlas)	TCGA-FI-A2D4-01	Uterine Endometrioid Carcinoma	L1048Sfs*61	OncoKB: Unknown, level NA;CIViC: NA;MyCancerGenome: not present;CancerHotspot: no;3DHotspot: no	MutationAssessor: NA;SIFT: NA;Polyphen-2: NA	Frame_Shift_Del	DEL	gain		.	.	.	10	43622120	43622120	C	-	10:g.43622120del	ENST00000355710.3:c.3142del	0.27		14	38		29	326	19/20
Breast Invasive Carcinoma (TCGA, PanCancer Atlas)	TCGA-C8-A8HR-01	Breast Invasive Lobular Carcinoma	L1101V	OncoKB: Unknown, level NA;CIViC: NA;MyCancerGenome: not present;CancerHotspot: no;3DHotspot: no	MutationAssessor: impact: neutral, score: -0.805;SIFT: NA;Polyphen-2: NA	Missense_Mutation	SNP	diploid		.	.	.	10	43623673	43623673	C	G	10:g.43623673C>G	ENST00000355710.3:c.3301C>G	0.08		7	76		62	40	20/20
Colorectal Adenocarcinoma (TCGA, PanCancer Atlas)	TCGA-AF-5654-01	Rectal Adenocarcinoma	Y508H	OncoKB: Unknown, level NA;CIViC: NA;MyCancerGenome: not present;CancerHotspot: no;3DHotspot: no	MutationAssessor: impact: low, score: 1.6;SIFT: impact: tolerated, score: 0.51;Polyphen-2: impact: benign, score: 0.006	Missense_Mutation	SNP	diploid		.	.	.	10	43606913	43606913	T	C	10:g.43606913T>C	ENST00000355710.3:c.1522T>C	0.25		4	12		22	121	44397
Colorectal Adenocarcinoma (TCGA, PanCancer Atlas)	TCGA-AG-A002-01	Rectal Adenocarcinoma	P715S	OncoKB: Unknown, level NA;CIViC: NA;MyCancerGenome: not present;CancerHotspot: no;3DHotspot: no	MutationAssessor: impact: low, score: 1.495;SIFT: impact: tolerated, score: 0.06;Polyphen-2: impact: probably_damaging, score: 0.999	Missense_Mutation	SNP	diploid		.	.	.	10	43612038	43612038	C	T	10:g.43612038C>T	ENST00000355710.3:c.2143C>T	0.27		12	33		37	11431	44550
Colorectal Adenocarcinoma (TCGA, PanCancer Atlas)	TCGA-D5-6928-01	Mucinous Adenocarcinoma of the Colon and Rectum	E595K	OncoKB: Unknown, level NA;CIViC: NA;MyCancerGenome: not present;CancerHotspot: no;3DHotspot: no	MutationAssessor: impact: medium, score: 2.25;SIFT: impact: tolerated, score: 0.21;Polyphen-2: impact: probably_damaging, score: 0.92	Missense_Mutation	SNP	diploid	1	.	.	.	10	43609027	43609027	G	A	10:g.43609027G>A	ENST00000355710.3:c.1783G>A	0.16		4	21		16	1602	44489
Colorectal Adenocarcinoma (TCGA, PanCancer Atlas)	TCGA-G4-6302-01	Mucinous Adenocarcinoma of the Colon and Rectum	G74S	OncoKB: Unknown, level NA;CIViC: NA;MyCancerGenome: not present;CancerHotspot: no;3DHotspot: no	MutationAssessor: impact: low, score: 1.01;SIFT: impact: tolerated_low_confidence, score: 0.55;Polyphen-2: impact: benign, score: 0.069	Missense_Mutation	SNP	diploid		.	.	.	10	43596053	43596053	G	A	10:g.43596053G>A	ENST00000355710.3:c.220G>A	0.09		10	100		19	941	44247
Ovarian Serous Cystadenocarcinoma (TCGA, PanCancer Atlas)	TCGA-13-0807-01	Serous Ovarian Cancer	N879S	OncoKB: Unknown, level NA;CIViC: NA;MyCancerGenome: not present;CancerHotspot: no;3DHotspot: no	MutationAssessor: impact: medium, score: 3.36;SIFT: impact: deleterious, score: 0;Polyphen-2: impact: probably_damaging, score: 0.997	Missense_Mutation	SNP	gain	1	.	.	.	10	43615557	43615557	A	G	10:g.43615557A>G	ENST00000355710.3:c.2636A>G	0.22		8	28		18	287	15/20
Ovarian Serous Cystadenocarcinoma (TCGA, PanCancer Atlas)	TCGA-24-1426-01	Serous Ovarian Cancer	R205S	OncoKB: Unknown, level NA;CIViC: NA;MyCancerGenome: not present;CancerHotspot: no;3DHotspot: no	MutationAssessor: impact: low, score: 0.895;SIFT: impact: tolerated, score: 0.89;Polyphen-2: impact: benign, score: 0.001	Missense_Mutation	SNP	diploid	1	.	.	.	10	43598067	43598067	G	T	10:g.43598067G>T	ENST00000355710.3:c.615G>T	0.07		7	97		32	140	44275
Uterine Corpus Endometrial Carcinoma (TCGA, PanCancer Atlas)	TCGA-AP-A059-01	Uterine Endometrioid Carcinoma	I858V	OncoKB: Unknown, level NA;CIViC: NA;MyCancerGenome: not present;CancerHotspot: no;3DHotspot: no	MutationAssessor: impact: neutral, score: 0.64;SIFT: impact: deleterious, score: 0.03;Polyphen-2: impact: probably_damaging, score: 0.985	Missense_Mutation	SNP	diploid		.	.	.	10	43615158	43615158	A	G	10:g.43615158A>G	ENST00000355710.3:c.2572A>G	0.08		3	33		33	10939	14/20
Brain Lower Grade Glioma (TCGA, PanCancer Atlas)	TCGA-DU-6392-01	Astrocytoma	G435D	OncoKB: Unknown, level NA;CIViC: NA;MyCancerGenome: not present;CancerHotspot: no;3DHotspot: no	MutationAssessor: impact: medium, score: 2.645;SIFT: impact: deleterious, score: 0.04;Polyphen-2: impact: probably_damaging, score: 1	Missense_Mutation	SNP	diploid		.	.	.	10	43606695	43606695	G	A	10:g.43606695G>A	ENST00000355710.3:c.1304G>A	0.35		28	53		105	10863	44397
Uterine Corpus Endometrial Carcinoma (TCGA, PanCancer Atlas)	TCGA-EO-A22U-01	Uterine Endometrioid Carcinoma	R180*	OncoKB: Unknown, level NA;CIViC: NA;MyCancerGenome: not present;CancerHotspot: no;3DHotspot: no	MutationAssessor: NA;SIFT: NA;Polyphen-2: NA	Nonsense_Mutation	SNP	diploid		.	.	.	10	43597990	43597990	C	T	10:g.43597990C>T	ENST00000355710.3:c.538C>T	0.45		25	30		15	13829	44275
Kidney Renal Clear Cell Carcinoma (TCGA, PanCancer Atlas)	TCGA-B8-5551-01	Renal Clear Cell Carcinoma	L101P	OncoKB: Unknown, level NA;CIViC: NA;MyCancerGenome: not present;CancerHotspot: no;3DHotspot: no	MutationAssessor: impact: medium, score: 2.85;SIFT: impact: deleterious_low_confidence, score: 0;Polyphen-2: impact: probably_damaging, score: 1	Missense_Mutation	SNP	diploid		.	.	.	10	43596135	43596135	T	C	10:g.43596135T>C	ENST00000355710.3:c.302T>C	0.09		3	30		18	51	44247
Brain Lower Grade Glioma (TCGA, PanCancer Atlas)	TCGA-DU-6392-01	Astrocytoma	R813W	OncoKB: Unknown, level NA;CIViC: NA;MyCancerGenome: not present;CancerHotspot: no;3DHotspot: no	MutationAssessor: impact: low, score: 1.345;SIFT: impact: deleterious, score: 0;Polyphen-2: impact: probably_damaging, score: 1	Missense_Mutation	SNP	diploid		.	.	.	10	43615023	43615023	C	T	10:g.43615023C>T	ENST00000355710.3:c.2437C>T	0.35		7	13		21	10863	14/20
Brain Lower Grade Glioma (TCGA, PanCancer Atlas)	TCGA-DU-A6S7-01	Astrocytoma	D1093G	OncoKB: Unknown, level NA;CIViC: NA;MyCancerGenome: not present;CancerHotspot: no;3DHotspot: no	MutationAssessor: impact: low, score: 1.1;SIFT: NA;Polyphen-2: NA	Missense_Mutation	SNP	diploid		.	.	.	10	43623650	43623650	A	G	10:g.43623650A>G	ENST00000355710.3:c.3278A>G	0.05		5	102		103	28	20/20
Skin Cutaneous Melanoma (TCGA, PanCancer Atlas)	TCGA-BF-A1Q0-01	Cutaneous Melanoma	L851I	OncoKB: Unknown, level NA;CIViC: NA;MyCancerGenome: not present;CancerHotspot: no;3DHotspot: no	MutationAssessor: impact: low, score: 1.5;SIFT: impact: tolerated, score: 0.32;Polyphen-2: impact: probably_damaging, score: 0.999	Missense_Mutation	SNP		1	.	.	.	10	43615137	43615137	C	A	10:g.43615137C>A	ENST00000355710.3:c.2551C>A	0.09		5	48		68	2630	14/20
Skin Cutaneous Melanoma (TCGA, PanCancer Atlas)	TCGA-D3-A3C7-06	Cutaneous Melanoma	W324L	OncoKB: Unknown, level NA;CIViC: NA;MyCancerGenome: not present;CancerHotspot: no;3DHotspot: no	MutationAssessor: impact: medium, score: 2.27;SIFT: impact: tolerated, score: 0.19;Polyphen-2: impact: benign, score: 0.014	Missense_Mutation	SNP	diploid		.	.	.	10	43601927	43601927	G	T	10:g.43601927G>T	ENST00000355710.3:c.971G>T	0.18		3	14		16	1444	44336
Skin Cutaneous Melanoma (TCGA, PanCancer Atlas)	TCGA-D9-A1X3-06	Cutaneous Melanoma	S379*	OncoKB: Unknown, level NA;CIViC: NA;MyCancerGenome: not present;CancerHotspot: no;3DHotspot: no	MutationAssessor: NA;SIFT: NA;Polyphen-2: NA	Nonsense_Mutation	SNP	shallowdel		.	.	.	10	43604551	43604551	C	A	10:g.43604551C>A	ENST00000355710.3:c.1136C>A	0.1		3	27		45	413	44367
Skin Cutaneous Melanoma (TCGA, PanCancer Atlas)	TCGA-DA-A1I1-06	Cutaneous Melanoma	K907N	OncoKB: Unknown, level NA;CIViC: NA;MyCancerGenome: not present;CancerHotspot: no;3DHotspot: no	MutationAssessor: impact: low, score: 1.15;SIFT: impact: deleterious, score: 0;Polyphen-2: impact: probably_damaging, score: 1	Missense_Mutation	SNP	shallowdel		.	.	.	10	43615642	43615642	G	T	10:g.43615642G>T	ENST00000355710.3:c.2721G>T	0.14		3	18		24	1527	15/20
Skin Cutaneous Melanoma (TCGA, PanCancer Atlas)	TCGA-DA-A95Y-06	Cutaneous Melanoma	E366Q	OncoKB: Unknown, level NA;CIViC: NA;MyCancerGenome: not present;CancerHotspot: no;3DHotspot: no	MutationAssessor: impact: medium, score: 2.645;SIFT: impact: deleterious, score: 0.01;Polyphen-2: impact: probably_damaging, score: 0.957	Missense_Mutation	SNP	shallowdel		.	.	.	10	43604511	43604511	G	C	10:g.43604511G>C	ENST00000355710.3:c.1096G>C	0.4		19	28		45	369	44367
Skin Cutaneous Melanoma (TCGA, PanCancer Atlas)	TCGA-EE-A181-06	Cutaneous Melanoma	E208D	OncoKB: Unknown, level NA;CIViC: NA;MyCancerGenome: not present;CancerHotspot: no;3DHotspot: no	MutationAssessor: impact: low, score: 1.87;SIFT: impact: tolerated, score: 0.24;Polyphen-2: impact: benign, score: 0.012	Missense_Mutation	SNP	shallowdel		.	.	.	10	43598076	43598076	G	T	10:g.43598076G>T	ENST00000355710.3:c.624G>T	0.13		3	20		58	4527	44275
Skin Cutaneous Melanoma (TCGA, PanCancer Atlas)	TCGA-EE-A29G-06	Cutaneous Melanoma	P259Q	OncoKB: Unknown, level NA;CIViC: NA;MyCancerGenome: not present;CancerHotspot: no;3DHotspot: no	MutationAssessor: impact: medium, score: 2.035;SIFT: impact: tolerated, score: 0.6;Polyphen-2: impact: benign, score: 0.125	Missense_Mutation	SNP	shallowdel		.	.	.	10	43600550	43600550	C	A	10:g.43600550C>A	ENST00000355710.3:c.776C>A	0.14		5	30		20	680	44306
Skin Cutaneous Melanoma (TCGA, PanCancer Atlas)	TCGA-EE-A29P-06	Cutaneous Melanoma	G308V	OncoKB: Unknown, level NA;CIViC: NA;MyCancerGenome: not present;CancerHotspot: no;3DHotspot: no	MutationAssessor: impact: medium, score: 2;SIFT: impact: tolerated, score: 0.24;Polyphen-2: impact: benign, score: 0.038	Missense_Mutation	SNP	shallowdel		.	.	.	10	43601879	43601879	G	T	10:g.43601879G>T	ENST00000355710.3:c.923G>T	0.31		4	9		19	414	44336
Skin Cutaneous Melanoma (TCGA, PanCancer Atlas)	TCGA-ER-A19P-06	Cutaneous Melanoma	S696*	OncoKB: Unknown, level NA;CIViC: NA;MyCancerGenome: not present;CancerHotspot: no;3DHotspot: no	MutationAssessor: NA;SIFT: NA;Polyphen-2: NA	Nonsense_Mutation	SNP	shallowdel		.	.	.	10	43610135	43610135	C	A	10:g.43610135C>A	ENST00000355710.3:c.2087C>A	0.11		4	34		28	2916	44520
Skin Cutaneous Melanoma (TCGA, PanCancer Atlas)	TCGA-FR-A7U9-06	Cutaneous Melanoma	D1093N	OncoKB: Unknown, level NA;CIViC: NA;MyCancerGenome: not present;CancerHotspot: no;3DHotspot: no	MutationAssessor: impact: low, score: 1.1;SIFT: NA;Polyphen-2: NA	Missense_Mutation	SNP	diploid		.	.	.	10	43623649	43623649	G	A	10:g.43623649G>A	ENST00000355710.3:c.3277G>A	0.11		13	102		143	1509	20/20
Skin Cutaneous Melanoma (TCGA, PanCancer Atlas)	TCGA-GN-A8LK-06	Cutaneous Melanoma	F744Y	OncoKB: Unknown, level NA;CIViC: NA;MyCancerGenome: not present;CancerHotspot: no;3DHotspot: no	MutationAssessor: impact: neutral, score: -0.065;SIFT: impact: deleterious, score: 0.01;Polyphen-2: impact: probably_damaging, score: 0.993	Missense_Mutation	SNP	shallowdel		.	.	.	10	43612126	43612126	T	A	10:g.43612126T>A	ENST00000355710.3:c.2231T>A	0.37		55	94		215	1665	44550
Skin Cutaneous Melanoma (TCGA, PanCancer Atlas)	TCGA-GN-A8LK-06	Cutaneous Melanoma	H745N	OncoKB: Unknown, level NA;CIViC: NA;MyCancerGenome: not present;CancerHotspot: no;3DHotspot: no	MutationAssessor: impact: neutral, score: 0.375;SIFT: impact: tolerated, score: 0.35;Polyphen-2: impact: benign, score: 0	Missense_Mutation	SNP	shallowdel		.	.	.	10	43612128	43612128	C	A	10:g.43612128C>A	ENST00000355710.3:c.2233C>A	0.37		54	92		211	1665	44550
Skin Cutaneous Melanoma (TCGA, PanCancer Atlas)	TCGA-W3-AA1O-06	Cutaneous Melanoma	M970I	OncoKB: Unknown, level NA;CIViC: NA;MyCancerGenome: not present;CancerHotspot: no;3DHotspot: no	MutationAssessor: impact: neutral, score: 0.25;SIFT: impact: deleterious, score: 0;Polyphen-2: impact: probably_damaging, score: 0.996	Missense_Mutation	SNP	diploid		.	.	.	10	43619227	43619227	G	A	10:g.43619227G>A	ENST00000355710.3:c.2910G>A	0.42		30	42		55	627	17/20
Skin Cutaneous Melanoma (TCGA, PanCancer Atlas)	TCGA-W3-AA21-06	Cutaneous Melanoma	P320S	OncoKB: Unknown, level NA;CIViC: NA;MyCancerGenome: not present;CancerHotspot: no;3DHotspot: no	MutationAssessor: impact: neutral, score: 0.49;SIFT: impact: tolerated, score: 0.92;Polyphen-2: impact: benign, score: 0.005	Missense_Mutation	SNP	shallowdel		.	.	.	10	43601914	43601914	C	T	10:g.43601914C>T	ENST00000355710.3:c.958C>T	0.45		9	11		28	428	44336
Skin Cutaneous Melanoma (TCGA, PanCancer Atlas)	TCGA-WE-A8K5-06	Cutaneous Melanoma	P155S	OncoKB: Unknown, level NA;CIViC: NA;MyCancerGenome: not present;CancerHotspot: no;3DHotspot: no	MutationAssessor: impact: medium, score: 2.375;SIFT: impact: deleterious, score: 0.04;Polyphen-2: impact: benign, score: 0.146	Missense_Mutation	SNP	shallowdel		.	.	.	10	43597915	43597915	C	T	10:g.43597915C>T	ENST00000355710.3:c.463C>T	0.56		22	17		77	947	44275
Skin Cutaneous Melanoma (TCGA, PanCancer Atlas)	TCGA-Z2-A8RT-06	Cutaneous Melanoma	D1000N	OncoKB: Unknown, level NA;CIViC: NA;MyCancerGenome: not present;CancerHotspot: no;3DHotspot: no	MutationAssessor: impact: low, score: 0.995;SIFT: impact: tolerated, score: 0.07;Polyphen-2: impact: possibly_damaging, score: 0.838	Missense_Mutation	SNP	diploid		.	.	.	10	43620389	43620389	G	A	10:g.43620389G>A	ENST00000355710.3:c.2998G>A	0.39		44	68		103	2422	18/20
Thyroid Carcinoma (TCGA, PanCancer Atlas)	TCGA-DJ-A3VI-01	Papillary Thyroid Cancer	V945M	OncoKB: Unknown, level NA;CIViC: NA;MyCancerGenome: not present;CancerHotspot: no;3DHotspot: no	MutationAssessor: impact: low, score: 0.92;SIFT: impact: deleterious, score: 0.01;Polyphen-2: impact: probably_damaging, score: 1	Missense_Mutation	SNP	diploid		.	.	.	10	43619150	43619150	G	A	10:g.43619150G>A	ENST00000355710.3:c.2833G>A	0.43		81	109		168	15	17/20
Stomach Adenocarcinoma (TCGA, PanCancer Atlas)	TCGA-VQ-A8E3-01	Intestinal Type Stomach Adenocarcinoma	N448S	OncoKB: Unknown, level NA;CIViC: NA;MyCancerGenome: not present;CancerHotspot: no;3DHotspot: no	MutationAssessor: impact: medium, score: 2.065;SIFT: impact: tolerated, score: 0.4;Polyphen-2: impact: benign, score: 0.314	Missense_Mutation	SNP	gain		.	.	.	10	43606734	43606734	A	G	10:g.43606734A>G	ENST00000355710.3:c.1343A>G	0.19		21	90		189	682	44397
Stomach Adenocarcinoma (TCGA, PanCancer Atlas)	TCGA-VQ-A91S-01	Tubular Stomach Adenocarcinoma	K907T	OncoKB: Unknown, level NA;CIViC: NA;MyCancerGenome: not present;CancerHotspot: no;3DHotspot: no	MutationAssessor: impact: low, score: 1.105;SIFT: impact: deleterious, score: 0;Polyphen-2: impact: probably_damaging, score: 1	Missense_Mutation	SNP	diploid		.	.	.	10	43615641	43615641	A	C	10:g.43615641A>C	ENST00000355710.3:c.2720A>C	0.28		5	13		34	230	15/20
Stomach Adenocarcinoma (TCGA, PanCancer Atlas)	TCGA-VQ-A924-01	Tubular Stomach Adenocarcinoma	E921D	OncoKB: Unknown, level NA;CIViC: NA;MyCancerGenome: not present;CancerHotspot: no;3DHotspot: no	MutationAssessor: impact: medium, score: 3.075;SIFT: impact: deleterious, score: 0.01;Polyphen-2: impact: possibly_damaging, score: 0.526	Missense_Mutation	SNP	diploid	1	.	.	.	10	43617426	43617426	A	T	10:g.43617426A>T	ENST00000355710.3:c.2763A>T	0.21		27	99		152	1211	16/20
Lung Adenocarcinoma (TCGA, PanCancer Atlas)	TCGA-44-6145-01	Lung Adenocarcinoma	P560H	OncoKB: Unknown, level NA;CIViC: NA;MyCancerGenome: not present;CancerHotspot: no;3DHotspot: no	MutationAssessor: impact: medium, score: 2.72;SIFT: impact: deleterious, score: 0;Polyphen-2: impact: probably_damaging, score: 1	Missense_Mutation	SNP	gain		.	.	.	10	43608331	43608331	C	A	10:g.43608331C>A	ENST00000355710.3:c.1679C>A	0.22		6	21		37	298	44459
Lung Adenocarcinoma (TCGA, PanCancer Atlas)	TCGA-95-7039-01	Lung Adenocarcinoma	P766Q	OncoKB: Unknown, level NA;CIViC: NA;MyCancerGenome: not present;CancerHotspot: no;3DHotspot: no	MutationAssessor: impact: low, score: 0.855;SIFT: impact: tolerated, score: 0.91;Polyphen-2: impact: benign, score: 0.066	Missense_Mutation	SNP	diploid	1	.	.	.	10	43613833	43613833	C	A	10:g.43613833C>A	ENST00000355710.3:c.2297C>A	0.41		7	10		10	1209	13/20
Ovarian Serous Cystadenocarcinoma (TCGA, PanCancer Atlas)	TCGA-09-2051-01	Serous Ovarian Cancer	A342G	OncoKB: Unknown, level NA;CIViC: NA;MyCancerGenome: not present;CancerHotspot: no;3DHotspot: no	MutationAssessor: impact: low, score: 1.39;SIFT: impact: tolerated, score: 0.33;Polyphen-2: impact: benign, score: 0.001	Missense_Mutation	SNP	diploid	1	.	.	.	10	43601981	43601981	C	G	10:g.43601981C>G	ENST00000355710.3:c.1025C>G	0.28		9	23		22	233	44336
Ovarian Serous Cystadenocarcinoma (TCGA, PanCancer Atlas)	TCGA-13-0807-01	Serous Ovarian Cancer	N879D	OncoKB: Unknown, level NA;CIViC: NA;MyCancerGenome: not present;CancerHotspot: no;3DHotspot: no	MutationAssessor: impact: high, score: 4.1;SIFT: impact: deleterious, score: 0;Polyphen-2: impact: probably_damaging, score: 0.999	Missense_Mutation	SNP	gain	1	.	.	.	10	43615556	43615556	A	G	10:g.43615556A>G	ENST00000355710.3:c.2635A>G	0.23		8	27		18	287	15/20
Ovarian Serous Cystadenocarcinoma (TCGA, PanCancer Atlas)	TCGA-13-0910-01	Serous Ovarian Cancer	K780N	OncoKB: Unknown, level NA;CIViC: NA;MyCancerGenome: not present;CancerHotspot: no;3DHotspot: no	MutationAssessor: impact: medium, score: 2.12;SIFT: impact: deleterious, score: 0.02;Polyphen-2: impact: probably_damaging, score: 1	Missense_Mutation	SNP	diploid		.	.	.	10	43613876	43613876	G	T	10:g.43613876G>T	ENST00000355710.3:c.2340G>T	0.13		16	105		87	56	13/20
Ovarian Serous Cystadenocarcinoma (TCGA, PanCancer Atlas)	TCGA-13-1411-01	Serous Ovarian Cancer	D58N	OncoKB: Unknown, level NA;CIViC: NA;MyCancerGenome: not present;CancerHotspot: no;3DHotspot: no	MutationAssessor: impact: medium, score: 2.81;SIFT: impact: deleterious_low_confidence, score: 0;Polyphen-2: impact: probably_damaging, score: 0.979	Missense_Mutation	SNP	gain		.	.	.	10	43596005	43596005	G	A	10:g.43596005G>A	ENST00000355710.3:c.172G>A	0.68		13	6		36	60	44247
Ovarian Serous Cystadenocarcinoma (TCGA, PanCancer Atlas)	TCGA-23-1121-01	Serous Ovarian Cancer	A1105G	OncoKB: Unknown, level NA;CIViC: NA;MyCancerGenome: not present;CancerHotspot: no;3DHotspot: no	MutationAssessor: impact: low, score: 0.895;SIFT: NA;Polyphen-2: NA	Missense_Mutation	SNP	shallowdel		.	.	.	10	43623686	43623686	C	G	10:g.43623686C>G	ENST00000355710.3:c.3314C>G	0.41		86	122		159	343	20/20
Ovarian Serous Cystadenocarcinoma (TCGA, PanCancer Atlas)	TCGA-36-2543-01	Serous Ovarian Cancer	G248S	OncoKB: Unknown, level NA;CIViC: NA;MyCancerGenome: not present;CancerHotspot: no;3DHotspot: no	MutationAssessor: impact: low, score: 1.41;SIFT: impact: tolerated, score: 0.36;Polyphen-2: impact: benign, score: 0.01	Missense_Mutation	SNP	shallowdel	1	.	.	.	10	43600516	43600516	G	A	10:g.43600516G>A	ENST00000355710.3:c.742G>A	0.27		30	83		173	65	44306
Breast Invasive Carcinoma (TCGA, PanCancer Atlas)	TCGA-AR-A251-01	Breast Invasive Ductal Carcinoma	P951Lfs*12	OncoKB: Unknown, level NA;CIViC: NA;MyCancerGenome: not present;CancerHotspot: no;3DHotspot: no	MutationAssessor: NA;SIFT: NA;Polyphen-2: NA	Frame_Shift_Del	DEL	gain		.	.	.	10	43619167	43619173	CCCCTAT	-	10:g.43619167_43619173del	ENST00000355710.3:c.2852_2858del	0.13		6	42		44	159	17/20
Breast Invasive Carcinoma (TCGA, PanCancer Atlas)	TCGA-D8-A27V-01	Breast Invasive Lobular Carcinoma	A793Pfs*76	OncoKB: Unknown, level NA;CIViC: NA;MyCancerGenome: not present;CancerHotspot: no;3DHotspot: no	MutationAssessor: NA;SIFT: NA;Polyphen-2: NA	Frame_Shift_Del	DEL	diploid		.	.	.	10	43613910	43613910	G	-	10:g.43613910del	ENST00000355710.3:c.2377del	0.13		7	46		20	3079	13/20
Breast Invasive Carcinoma (TCGA, PanCancer Atlas)	TCGA-EW-A2FV-01	Breast Invasive Carcinoma (NOS)	P537Qfs*101	OncoKB: Unknown, level NA;CIViC: NA;MyCancerGenome: not present;CancerHotspot: no;3DHotspot: no	MutationAssessor: NA;SIFT: NA;Polyphen-2: NA	Frame_Shift_Del	DEL	gain		.	.	.	10	43607631	43607631	C	-	10:g.43607631del	ENST00000355710.3:c.1610del	0.11		21	167		163	3876	44428
Breast Invasive Carcinoma (TCGA, PanCancer Atlas)	TCGA-EW-A2FV-01	Breast Invasive Carcinoma (NOS)	F663Lfs*12	OncoKB: Unknown, level NA;CIViC: NA;MyCancerGenome: not present;CancerHotspot: no;3DHotspot: no	MutationAssessor: NA;SIFT: NA;Polyphen-2: NA	Frame_Shift_Del	DEL	gain		.	.	.	10	43610035	43610035	T	-	10:g.43610035del	ENST00000355710.3:c.1989del	0.09		13	138		162	3876	44520
Cervical Squamous Cell Carcinoma (TCGA, PanCancer Atlas)	TCGA-2W-A8YY-01	Cervical Squamous Cell Carcinoma	R693C	OncoKB: Unknown, level NA;CIViC: NA;MyCancerGenome: not present;CancerHotspot: no;3DHotspot: no	MutationAssessor: impact: low, score: 1.495;SIFT: impact: deleterious, score: 0;Polyphen-2: impact: probably_damaging, score: 0.999	Missense_Mutation	SNP	diploid		.	.	.	10	43610125	43610125	C	T	10:g.43610125C>T	ENST00000355710.3:c.2077C>T	0.33		9	18		25	11306	44520
Cervical Squamous Cell Carcinoma (TCGA, PanCancer Atlas)	TCGA-MA-AA3X-01	Cervical Squamous Cell Carcinoma	M759I	OncoKB: Unknown, level NA;CIViC: NA;MyCancerGenome: not present;CancerHotspot: no;3DHotspot: no	MutationAssessor: impact: neutral, score: 0.635;SIFT: impact: deleterious, score: 0.01;Polyphen-2: impact: probably_damaging, score: 0.993	Missense_Mutation	SNP	diploid	1	.	.	.	10	43612172	43612172	G	A	10:g.43612172G>A	ENST00000355710.3:c.2277G>A	0.1		8	69		69	60	44550
Uterine Corpus Endometrial Carcinoma (TCGA, PanCancer Atlas)	TCGA-A5-A0G1-01	Uterine Serous Carcinoma/Uterine Papillary Serous Carcinoma	C976Y	OncoKB: Unknown, level NA;CIViC: NA;MyCancerGenome: not present;CancerHotspot: no;3DHotspot: no	MutationAssessor: impact: medium, score: 2.35;SIFT: impact: deleterious, score: 0;Polyphen-2: impact: probably_damaging, score: 1	Missense_Mutation	SNP	diploid		.	.	.	10	43619244	43619244	G	A	10:g.43619244G>A	ENST00000355710.3:c.2927G>A	0.21		20	75		94	10820	17/20
Uterine Corpus Endometrial Carcinoma (TCGA, PanCancer Atlas)	TCGA-A5-A0G2-01	Uterine Serous Carcinoma/Uterine Papillary Serous Carcinoma	S649L	OncoKB: Unknown, level NA;CIViC: NA;MyCancerGenome: not present;CancerHotspot: no;3DHotspot: no	MutationAssessor: impact: medium, score: 2.67;SIFT: impact: deleterious, score: 0.04;Polyphen-2: impact: probably_damaging, score: 0.999	Missense_Mutation	SNP	diploid	1	.	.	.	10	43609994	43609994	C	T	10:g.43609994C>T	ENST00000355710.3:c.1946C>T	0.15		4	23		24	25711	44520
Uterine Corpus Endometrial Carcinoma (TCGA, PanCancer Atlas)	TCGA-AX-A2HC-01	Uterine Endometrioid Carcinoma	S649L	OncoKB: Unknown, level NA;CIViC: NA;MyCancerGenome: not present;CancerHotspot: no;3DHotspot: no	MutationAssessor: impact: medium, score: 2.67;SIFT: impact: deleterious, score: 0.04;Polyphen-2: impact: probably_damaging, score: 0.999	Missense_Mutation	SNP	diploid	1	.	.	.	10	43609994	43609994	C	T	10:g.43609994C>T	ENST00000355710.3:c.1946C>T	0.54		29	25		51	12976	44520
Uterine Corpus Endometrial Carcinoma (TCGA, PanCancer Atlas)	TCGA-A5-A0VP-01	Uterine Endometrioid Carcinoma	R969W	OncoKB: Unknown, level NA;CIViC: NA;MyCancerGenome: not present;CancerHotspot: no;3DHotspot: no	MutationAssessor: impact: medium, score: 3.3;SIFT: impact: deleterious, score: 0;Polyphen-2: impact: probably_damaging, score: 1	Missense_Mutation	SNP	diploid	2	.	.	.	10	43619222	43619222	C	T	10:g.43619222C>T	ENST00000355710.3:c.2905C>T	0.11		5	42		93	1472	17/20
Uterine Corpus Endometrial Carcinoma (TCGA, PanCancer Atlas)	TCGA-A5-A1OF-01	Uterine Mixed Endometrial Carcinoma	A640V	OncoKB: Unknown, level NA;CIViC: NA;MyCancerGenome: not present;CancerHotspot: no;3DHotspot: no	MutationAssessor: impact: low, score: 1.21;SIFT: impact: tolerated, score: 0.16;Polyphen-2: impact: benign, score: 0.009	Missense_Mutation	SNP	diploid		.	.	.	10	43609967	43609967	C	T	10:g.43609967C>T	ENST00000355710.3:c.1919C>T	0.33		19	38		58	10493	44520
Uterine Corpus Endometrial Carcinoma (TCGA, PanCancer Atlas)	TCGA-A5-A1OF-01	Uterine Mixed Endometrial Carcinoma	A793D	OncoKB: Unknown, level NA;CIViC: NA;MyCancerGenome: not present;CancerHotspot: no;3DHotspot: no	MutationAssessor: impact: low, score: 1.81;SIFT: impact: deleterious, score: 0;Polyphen-2: impact: probably_damaging, score: 1	Missense_Mutation	SNP	diploid	1	.	.	.	10	43613914	43613914	C	A	10:g.43613914C>A	ENST00000355710.3:c.2378C>A	0.17	0.02	6	30	1	40	10493	13/20
Uterine Corpus Endometrial Carcinoma (TCGA, PanCancer Atlas)	TCGA-AJ-A3BG-01	Uterine Mixed Endometrial Carcinoma	K161E	OncoKB: Unknown, level NA;CIViC: NA;MyCancerGenome: not present;CancerHotspot: no;3DHotspot: no	MutationAssessor: impact: medium, score: 1.995;SIFT: impact: tolerated, score: 0.57;Polyphen-2: impact: benign, score: 0.003	Missense_Mutation	SNP	diploid		.	.	.	10	43597933	43597933	A	G	10:g.43597933A>G	ENST00000355710.3:c.481A>G	0.41		16	23		59	1274	44275
Uterine Corpus Endometrial Carcinoma (TCGA, PanCancer Atlas)	TCGA-AJ-A5DW-01	Uterine Endometrioid Carcinoma	L196S	OncoKB: Unknown, level NA;CIViC: NA;MyCancerGenome: not present;CancerHotspot: no;3DHotspot: no	MutationAssessor: impact: low, score: 1.775;SIFT: impact: tolerated, score: 0.07;Polyphen-2: impact: benign, score: 0.021	Missense_Mutation	SNP	diploid		.	.	.	10	43598039	43598039	T	C	10:g.43598039T>C	ENST00000355710.3:c.587T>C	0.14		6	38		41	3188	44275
Uterine Corpus Endometrial Carcinoma (TCGA, PanCancer Atlas)	TCGA-AX-A1CI-01	Uterine Endometrioid Carcinoma	P273T	OncoKB: Unknown, level NA;CIViC: NA;MyCancerGenome: not present;CancerHotspot: no;3DHotspot: no	MutationAssessor: impact: low, score: 1.265;SIFT: impact: tolerated, score: 0.27;Polyphen-2: impact: benign, score: 0.007	Missense_Mutation	SNP	diploid		.	.	.	10	43600591	43600591	C	A	10:g.43600591C>A	ENST00000355710.3:c.817C>A	0.1		4	36		12	61	44306
Uterine Corpus Endometrial Carcinoma (TCGA, PanCancer Atlas)	TCGA-AX-A2HC-01	Uterine Endometrioid Carcinoma	N1092H	OncoKB: Unknown, level NA;CIViC: NA;MyCancerGenome: not present;CancerHotspot: no;3DHotspot: no	MutationAssessor: impact: low, score: 1.1;SIFT: NA;Polyphen-2: NA	Missense_Mutation	SNP	diploid		.	.	.	10	43623646	43623646	A	C	10:g.43623646A>C	ENST00000355710.3:c.3274A>C	0.33	0.02	18	37	1	58	12976	20/20
Uterine Corpus Endometrial Carcinoma (TCGA, PanCancer Atlas)	TCGA-AX-A2HD-01	Uterine Endometrioid Carcinoma	S396L	OncoKB: Unknown, level NA;CIViC: NA;MyCancerGenome: not present;CancerHotspot: no;3DHotspot: no	MutationAssessor: impact: medium, score: 2.39;SIFT: impact: deleterious, score: 0.01;Polyphen-2: impact: benign, score: 0.331	Missense_Mutation	SNP	diploid		.	.	.	10	43604602	43604602	C	T	10:g.43604602C>T	ENST00000355710.3:c.1187C>T	0.35		18	34		55	7848	44367
Uterine Corpus Endometrial Carcinoma (TCGA, PanCancer Atlas)	TCGA-B5-A0JY-01	Uterine Endometrioid Carcinoma	X1063_splice	OncoKB: Unknown, level NA;CIViC: NA;MyCancerGenome: not present;CancerHotspot: no;3DHotspot: no	MutationAssessor: impact: neutral, score: 0;SIFT: impact: deleterious_low_confidence, score: 0;Polyphen-2: impact: probably_damaging, score: 0.997	Splice_Region	SNP	diploid		.	.	.	10	43622178	43622178	T	G	10:g.43622178T>G	ENST00000355710.3:c.3187+8T>G	0.33		83	168		137	9706
Uterine Corpus Endometrial Carcinoma (TCGA, PanCancer Atlas)	TCGA-B5-A3FA-01	Uterine Endometrioid Carcinoma	A999V	OncoKB: Unknown, level NA;CIViC: NA;MyCancerGenome: not present;CancerHotspot: no;3DHotspot: no	MutationAssessor: impact: medium, score: 2.055;SIFT: impact: deleterious, score: 0.03;Polyphen-2: impact: benign, score: 0.257	Missense_Mutation	SNP	diploid	1	.	.	.	10	43620387	43620387	C	T	10:g.43620387C>T	ENST00000355710.3:c.2996C>T	0.44	0.02	14	18	1	40	9652	18/20
Uterine Corpus Endometrial Carcinoma (TCGA, PanCancer Atlas)	TCGA-DF-A2KU-01	Uterine Endometrioid Carcinoma	L1018I	OncoKB: Unknown, level NA;CIViC: NA;MyCancerGenome: not present;CancerHotspot: no;3DHotspot: no	MutationAssessor: impact: neutral, score: 0.695;SIFT: impact: deleterious, score: 0;Polyphen-2: impact: probably_damaging, score: 0.998	Missense_Mutation	SNP	diploid		.	.	.	10	43622035	43622035	C	A	10:g.43622035C>A	ENST00000355710.3:c.3052C>A	0.36		15	27		41	10052	19/20
Uterine Corpus Endometrial Carcinoma (TCGA, PanCancer Atlas)	TCGA-DI-A1BU-01	Uterine Mixed Endometrial Carcinoma	X508_splice	OncoKB: Unknown, level NA;CIViC: NA;MyCancerGenome: not present;CancerHotspot: no;3DHotspot: no	MutationAssessor: impact: , score: undefined;SIFT: NA;Polyphen-2: NA	Splice_Region	SNP	diploid		.	.	.	10	43607544	43607544	C	T	10:g.43607544C>T	ENST00000355710.3:c.1523-3C>T	0.47		50	57		49	7642
Uterine Corpus Endometrial Carcinoma (TCGA, PanCancer Atlas)	TCGA-E6-A1LX-01	Uterine Endometrioid Carcinoma	E251K	OncoKB: Unknown, level NA;CIViC: NA;MyCancerGenome: not present;CancerHotspot: no;3DHotspot: no	MutationAssessor: impact: low, score: 1.015;SIFT: impact: tolerated, score: 0.63;Polyphen-2: impact: benign, score: 0.001	Missense_Mutation	SNP	diploid		.	.	.	10	43600525	43600525	G	A	10:g.43600525G>A	ENST00000355710.3:c.751G>A	0.2		10	41		46	12691	44306
Uterine Corpus Endometrial Carcinoma (TCGA, PanCancer Atlas)	TCGA-EO-A22R-01	Uterine Endometrioid Carcinoma	A241V	OncoKB: Unknown, level NA;CIViC: NA;MyCancerGenome: not present;CancerHotspot: no;3DHotspot: no	MutationAssessor: impact: medium, score: 2.22;SIFT: impact: tolerated, score: 1;Polyphen-2: impact: benign, score: 0.007	Missense_Mutation	SNP	diploid		.	.	.	10	43600496	43600496	C	T	10:g.43600496C>T	ENST00000355710.3:c.722C>T	0.47		28	32		56	12771	44306
Uterine Corpus Endometrial Carcinoma (TCGA, PanCancer Atlas)	TCGA-EO-A22R-01	Uterine Endometrioid Carcinoma	R474W	OncoKB: Unknown, level NA;CIViC: NA;MyCancerGenome: not present;CancerHotspot: no;3DHotspot: no	MutationAssessor: impact: medium, score: 2.095;SIFT: impact: deleterious, score: 0;Polyphen-2: impact: possibly_damaging, score: 0.799	Missense_Mutation	SNP	diploid		.	.	.	10	43606811	43606811	C	T	10:g.43606811C>T	ENST00000355710.3:c.1420C>T	0.38		12	20		29	12771	44397
Uterine Corpus Endometrial Carcinoma (TCGA, PanCancer Atlas)	TCGA-EO-A22U-01	Uterine Endometrioid Carcinoma	I422=	OncoKB: Unknown, level NA;CIViC: NA;MyCancerGenome: not present;CancerHotspot: no;3DHotspot: no	MutationAssessor: NA;SIFT: NA;Polyphen-2: NA	Splice_Region	SNP	diploid		.	.	.	10	43606657	43606657	C	T	10:g.43606657C>T	ENST00000355710.3:c.1266C>T	0.43		13	17		21	13829	44397
Uterine Corpus Endometrial Carcinoma (TCGA, PanCancer Atlas)	TCGA-EO-A3B0-01	Uterine Endometrioid Carcinoma	S936Y	OncoKB: Unknown, level NA;CIViC: NA;MyCancerGenome: not present;CancerHotspot: no;3DHotspot: no	MutationAssessor: impact: high, score: 4.55;SIFT: impact: deleterious, score: 0;Polyphen-2: impact: probably_damaging, score: 1	Missense_Mutation	SNP	diploid	1	.	.	.	10	43619124	43619124	C	A	10:g.43619124C>A	ENST00000355710.3:c.2807C>A	0.51	0.01	44	42	1	66	10909	17/20
Uterine Corpus Endometrial Carcinoma (TCGA, PanCancer Atlas)	TCGA-EO-A3B0-01	Uterine Endometrioid Carcinoma	L1108*	OncoKB: Unknown, level NA;CIViC: NA;MyCancerGenome: not present;CancerHotspot: no;3DHotspot: no	MutationAssessor: NA;SIFT: NA;Polyphen-2: NA	Nonsense_Mutation	SNP	diploid	1	.	.	.	10	43623695	43623695	T	G	10:g.43623695T>G	ENST00000355710.3:c.3323T>G	0.25		14	42		43	10909	20/20
Uterine Corpus Endometrial Carcinoma (TCGA, PanCancer Atlas)	TCGA-EO-A3B0-01	Uterine Endometrioid Carcinoma	D1110G	OncoKB: Unknown, level NA;CIViC: NA;MyCancerGenome: not present;CancerHotspot: no;3DHotspot: no	MutationAssessor: impact: low, score: 1.795;SIFT: NA;Polyphen-2: NA	Missense_Mutation	SNP	diploid		.	.	.	10	43623701	43623701	A	G	10:g.43623701A>G	ENST00000355710.3:c.3329A>G	0.26		14	40		42	10909	20/20
Uterine Corpus Endometrial Carcinoma (TCGA, PanCancer Atlas)	TCGA-FI-A2D5-01	Uterine Endometrioid Carcinoma	P596H	OncoKB: Unknown, level NA;CIViC: NA;MyCancerGenome: not present;CancerHotspot: no;3DHotspot: no	MutationAssessor: impact: low, score: 1.905;SIFT: impact: tolerated, score: 0.14;Polyphen-2: impact: possibly_damaging, score: 0.792	Missense_Mutation	SNP	diploid	2	.	.	.	10	43609031	43609031	C	A	10:g.43609031C>A	ENST00000355710.3:c.1787C>A	0.24		10	32		40	13865	44489
Colorectal Adenocarcinoma (TCGA, PanCancer Atlas)	TCGA-DC-5869-01	Rectal Adenocarcinoma	T328S	OncoKB: Unknown, level NA;CIViC: NA;MyCancerGenome: not present;CancerHotspot: no;3DHotspot: no	MutationAssessor: impact: medium, score: 2.175;SIFT: impact: tolerated, score: 0.12;Polyphen-2: impact: benign, score: 0.167	Missense_Mutation	SNP	diploid	1	.	.	.	10	43601939	43601939	C	G	10:g.43601939C>G	ENST00000355710.3:c.983C>G	0.38		10	16		35	74	44336
Colorectal Adenocarcinoma (TCGA, PanCancer Atlas)	TCGA-DC-6683-01	Rectal Adenocarcinoma	R177W	OncoKB: Unknown, level NA;CIViC: NA;MyCancerGenome: not present;CancerHotspot: no;3DHotspot: no	MutationAssessor: impact: medium, score: 2.47;SIFT: impact: tolerated, score: 0.07;Polyphen-2: impact: probably_damaging, score: 0.998	Missense_Mutation	SNP	shallowdel	1	.	.	.	10	43597981	43597981	C	T	10:g.43597981C>T	ENST00000355710.3:c.529C>T	0.34		11	21		81	71	44275
Colorectal Adenocarcinoma (TCGA, PanCancer Atlas)	TCGA-G5-6641-01	Rectal Adenocarcinoma	Q703H	OncoKB: Unknown, level NA;CIViC: NA;MyCancerGenome: not present;CancerHotspot: no;3DHotspot: no	MutationAssessor: impact: low, score: 1.445;SIFT: impact: tolerated, score: 0.09;Polyphen-2: impact: probably_damaging, score: 0.922	Missense_Mutation	SNP	shallowdel	1	.	.	.	10	43610157	43610157	G	C	10:g.43610157G>C	ENST00000355710.3:c.2109G>C	0.38		6	10		32	93	44520
Colorectal Adenocarcinoma (TCGA, PanCancer Atlas)	TCGA-AA-3713-01	Colon Adenocarcinoma	K288N	OncoKB: Unknown, level NA;CIViC: NA;MyCancerGenome: not present;CancerHotspot: no;3DHotspot: no	MutationAssessor: impact: medium, score: 2.505;SIFT: impact: tolerated, score: 0.15;Polyphen-2: impact: benign, score: 0.156	Missense_Mutation	SNP	diploid	1	.	.	.	10	43600638	43600638	G	T	10:g.43600638G>T	ENST00000355710.3:c.864G>T	0.27		43	115		16	1021	44306
Colorectal Adenocarcinoma (TCGA, PanCancer Atlas)	TCGA-AA-3994-01	Mucinous Adenocarcinoma of the Colon and Rectum	L1016F	OncoKB: Unknown, level NA;CIViC: NA;MyCancerGenome: not present;CancerHotspot: no;3DHotspot: no	MutationAssessor: impact: low, score: 1.625;SIFT: impact: deleterious, score: 0;Polyphen-2: impact: probably_damaging, score: 0.999	Missense_Mutation	SNP	diploid		.	.	.	10	43622031	43622031	G	T	10:g.43622031G>T	ENST00000355710.3:c.3048G>T	0.07		14	187		121	178	19/20
Colorectal Adenocarcinoma (TCGA, PanCancer Atlas)	TCGA-AA-A00N-01	Mucinous Adenocarcinoma of the Colon and Rectum	P914S	OncoKB: Unknown, level NA;CIViC: NA;MyCancerGenome: not present;CancerHotspot: no;3DHotspot: no	MutationAssessor: impact: medium, score: 1.985;SIFT: impact: deleterious, score: 0;Polyphen-2: impact: probably_damaging, score: 1	Missense_Mutation	SNP	diploid		.	.	.	10	43617403	43617403	C	T	10:g.43617403C>T	ENST00000355710.3:c.2740C>T	0.19	0.0024	50	219	1	424	4869	16/20
Colorectal Adenocarcinoma (TCGA, PanCancer Atlas)	TCGA-AZ-4681-01	Colon Adenocarcinoma	P951A	OncoKB: Unknown, level NA;CIViC: NA;MyCancerGenome: not present;CancerHotspot: no;3DHotspot: no	MutationAssessor: impact: medium, score: 2.95;SIFT: impact: deleterious, score: 0;Polyphen-2: impact: probably_damaging, score: 0.999	Missense_Mutation	SNP	diploid		.	.	.	10	43619168	43619168	C	G	10:g.43619168C>G	ENST00000355710.3:c.2851C>G	0.42		20	28		95	79	17/20
Colorectal Adenocarcinoma (TCGA, PanCancer Atlas)	TCGA-CM-5861-01	Colon Adenocarcinoma	K789E	OncoKB: Unknown, level NA;CIViC: NA;MyCancerGenome: not present;CancerHotspot: no;3DHotspot: no	MutationAssessor: impact: neutral, score: 0.765;SIFT: impact: deleterious, score: 0.01;Polyphen-2: impact: possibly_damaging, score: 0.779	Missense_Mutation	SNP	diploid	1	.	.	.	10	43613901	43613901	A	G	10:g.43613901A>G	ENST00000355710.3:c.2365A>G	0.31		25	56		73	1360	13/20
Colorectal Adenocarcinoma (TCGA, PanCancer Atlas)	TCGA-D5-6540-01	Mucinous Adenocarcinoma of the Colon and Rectum	R418Q	OncoKB: Unknown, level NA;CIViC: NA;MyCancerGenome: not present;CancerHotspot: no;3DHotspot: no	MutationAssessor: impact: medium, score: 2.42;SIFT: impact: tolerated, score: 0.25;Polyphen-2: impact: benign, score: 0.2	Missense_Mutation	SNP	diploid	1	.	.	.	10	43604668	43604668	G	A	10:g.43604668G>A	ENST00000355710.3:c.1253G>A	0.3		10	23		32	1191	44367
Colorectal Adenocarcinoma (TCGA, PanCancer Atlas)	TCGA-F4-6569-01	Colon Adenocarcinoma	Q860R	OncoKB: Unknown, level NA;CIViC: NA;MyCancerGenome: not present;CancerHotspot: no;3DHotspot: no	MutationAssessor: impact: neutral, score: -0.83;SIFT: impact: tolerated, score: 1;Polyphen-2: impact: benign, score: 0	Missense_Mutation	SNP	diploid	1	.	.	.	10	43615165	43615165	A	G	10:g.43615165A>G	ENST00000355710.3:c.2579A>G	0.25		12	36		65	117	14/20
Glioblastoma Multiforme (TCGA, PanCancer Atlas)	TCGA-06-0166-01	Glioblastoma Multiforme	S339*	OncoKB: Unknown, level NA;CIViC: NA;MyCancerGenome: not present;CancerHotspot: no;3DHotspot: no	MutationAssessor: NA;SIFT: NA;Polyphen-2: NA	Nonsense_Mutation	SNP	shallowdel		.	.	.	10	43601972	43601972	C	A	10:g.43601972C>A	ENST00000355710.3:c.1016C>A	0.08		3	33		51	40	44336
Glioblastoma Multiforme (TCGA, PanCancer Atlas)	TCGA-06-1805-01	Glioblastoma Multiforme	E289A	OncoKB: Unknown, level NA;CIViC: NA;MyCancerGenome: not present;CancerHotspot: no;3DHotspot: no	MutationAssessor: impact: medium, score: 2.47;SIFT: impact: tolerated, score: 0.17;Polyphen-2: impact: benign, score: 0.009	Missense_Mutation	SNP	diploid		.	.	.	10	43600640	43600640	A	C	10:g.43600640A>C	ENST00000355710.3:c.866A>C	0.23		19	63		24	313	44306
Glioblastoma Multiforme (TCGA, PanCancer Atlas)	TCGA-06-5416-01	Glioblastoma Multiforme	N113=	OncoKB: Unknown, level NA;CIViC: NA;MyCancerGenome: not present;CancerHotspot: no;3DHotspot: no	MutationAssessor: NA;SIFT: NA;Polyphen-2: NA	Splice_Region	SNP	diploid		.	.	.	10	43597791	43597791	C	T	10:g.43597791C>T	ENST00000355710.3:c.339C>T	0.2		32	126		137	12177	44275
