# Supplementary material for: An integrative pan cancer analysis of RET aberrations and their potential clinical implications
Source: Sci Rep. 2022 Aug 17;12:13913. doi: 10.1038/s41598-022-17791-y (PMC9386015; doi:10.1038/s41598-022-17791-y)
Supplement: Supplementary file 4 — Supplementary Table 3. [file 41598_2022_17791_MOESM4_ESM.xlsx]

## Sheet: sheet 1
Supplementary Table S3. Somatic mutation distribution in different functional domains of RET for cancers with RET mutations and all cancers together
	Cadherin: Cadherin domain (173-256aa)	Pkinase_Tyr: Protein tyrosine kinase (724-1005aa)	Others	Fusion
Pan-cancer	17	80	172	42
UCEC	5	14	36
SKCM	1	12	27
THCA		1		36
COADREAD	1	8	20	1
LUAD		5	15	2
LUSC	2	8	8
STAD	1	5	12
BRCA		5	7	1
HNSC		2	11
OV	2	3	5	1
BLCA	1	3	4
GBM			7
PAAD		3	4
PCPG		4	3
LGG	1	2	3
ESCA	1	1	2
SARC		3
ACC			2
CESC		1	1
LIHC	1		1
PRAD			2
CHOL			1
KIRC			1
LAML				1
UVM	1
