# Supplementary material for: An integrative pan cancer analysis of RET aberrations and their potential clinical implications
Source: Sci Rep. 2022 Aug 17;12:13913. doi: 10.1038/s41598-022-17791-y (PMC9386015; doi:10.1038/s41598-022-17791-y)
Supplement: Supplementary file 5 — Supplementary Table 4. [file 41598_2022_17791_MOESM5_ESM.xlsx]

## Sheet: RET co-occurred mutations
Pathways and the related targets	Gene A	Gene B	Neither （number of patients）	A Not B（number of patients）	B Not A（number of patients）	Both（number of patients）	Log2 Odds Ratio	p-Value	q-Value	Tendency
Cell cycle control: RB1 RBL1 RBL2 CCNA1 CCNB1 CDK1 CCNE1 CDK2 CDC25A CCND1 CDK4 CDK6 CCND2 CDKN2A CDKN2B MYC CDKN1A CDKN1B E2F1 E2F2 E2F3 E2F4 E2F5 E2F6 E2F7 E2F8 SRC JAK1 JAK2 STAT1 STAT2 STAT3 STAT5A STAT5B	JAK2	RET	9543	321	269	58	2.68	<0.001	<0.001	Co-occurrence
	CDK1	RET	9766	98	292	35	>3	<0.001	<0.001	Co-occurrence
	STAT1	RET	9663	201	285	42	2.825	<0.001	<0.001	Co-occurrence
	RBL2	RET	9666	198	289	38	2.682	<0.001	<0.001	Co-occurrence
	JAK1	RET	9603	261	284	43	2.478	<0.001	<0.001	Co-occurrence
	E2F7	RET	9686	178	292	35	2.705	<0.001	<0.001	Co-occurrence
	E2F8	RET	9709	155	295	32	2.764	<0.001	<0.001	Co-occurrence
	RBL1	RET	9602	262	289	38	2.269	<0.001	<0.001	Co-occurrence
	STAT2	RET	9708	156	300	27	2.486	<0.001	<0.001	Co-occurrence
	STAT5B	RET	9691	173	299	28	2.391	<0.001	<0.001	Co-occurrence
	RB1	RET	9156	708	267	60	1.539	<0.001	<0.001	Co-occurrence
	E2F3	RET	9621	243	295	32	2.103	<0.001	<0.001	Co-occurrence
	CCNA1	RET	9649	215	297	30	2.181	<0.001	<0.001	Co-occurrence
	E2F6	RET	9775	89	310	17	2.59	<0.001	<0.001	Co-occurrence
	CDC25A	RET	9725	139	307	20	2.188	<0.001	<0.001	Co-occurrence
	E2F2	RET	9760	104	310	17	2.364	<0.001	<0.001	Co-occurrence
	CCNE1	RET	9422	442	290	37	1.443	<0.001	<0.001	Co-occurrence
	STAT3	RET	9674	190	305	22	1.877	<0.001	<0.001	Co-occurrence
	E2F4	RET	9754	110	312	15	2.092	<0.001	<0.001	Co-occurrence
	STAT5A	RET	9708	156	309	18	1.858	<0.001	<0.001	Co-occurrence
	CDK6	RET	9631	233	306	21	1.504	<0.001	<0.001	Co-occurrence
	E2F1	RET	9626	238	307	20	1.398	<0.001	<0.001	Co-occurrence
	CCND2	RET	9623	241	307	20	1.379	<0.001	<0.001	Co-occurrence
	CCNB1	RET	9739	125	314	13	1.69	<0.001	<0.001	Co-occurrence
	CDKN2A	RET	8249	1615	251	76	0.629	0.001	0.002	Co-occurrence
	CDKN1B	RET	9673	191	311	16	1.382	0.001	0.002	Co-occurrence
	CDKN1A	RET	9686	178	312	15	1.387	0.001	0.002	Co-occurrence
	CDK2	RET	9752	112	316	11	1.6	0.002	0.003	Co-occurrence
	E2F5	RET	9504	360	304	23	0.998	0.003	0.005	Co-occurrence
	SRC	RET	9685	179	313	14	1.275	0.004	0.006	Co-occurrence
	CDK4	RET	9597	267	310	17	0.979	0.01	0.014	Co-occurrence
p53 signaling: TP53 MDM2 MDM4 CDKN2A CDKN2B TP53BP1	TP53BP1	RET	9575	289	277	50	2.58	<0.001	<0.001	Co-occurrence
	MDM2	RET	9513	351	296	31	1.505	<0.001	<0.001	Co-occurrence
	TP53	RET	6156	3708	165	162	0.705	<0.001	<0.001	Co-occurrence
	CDKN2A	RET	8249	1615	251	76	0.629	0.001	0.003	Co-occurrence
Notch signaling: ADAM10 ADAM17 APH1A APH1B ARRDC1 CIR1 CTBP1 CTBP2 CUL1 DLL1 DLL3 DLL4 DTX1 DTX2 DTX3 DTX3L DTX4 EP300 FBXW7 HDAC1 HDAC2 HES1 HES5 HEYL ITCH JAG1 JAG2 KDM5A LFNG MAML1 MAML2 MAML3 MFNG NCOR2 NCSTN NOTCH1 NOTCH2 NOTCH3 NOTCH4 NRARP NUMB NUMBL PSEN1 PSEN2 PSENEN RBPJ RBPJL RFNG SNW1 SPEN HES2 HES4 HES7 HEY1 HEY2	SPEN	RET	9416	448	251	76	2.67	<0.001	<0.001	Co-occurrence
	NOTCH4	RET	9478	386	267	60	2.464	<0.001	<0.001	Co-occurrence
	NOTCH3	RET	9423	441	264	63	2.35	<0.001	<0.001	Co-occurrence
	JAG1	RET	9638	226	281	46	2.803	<0.001	<0.001	Co-occurrence
	KDM5A	RET	9447	417	269	58	2.288	<0.001	<0.001	Co-occurrence
	EP300	RET	9430	434	268	59	2.258	<0.001	<0.001	Co-occurrence
	NCOR2	RET	9473	391	272	55	2.292	<0.001	<0.001	Co-occurrence
	MAML2	RET	9595	269	281	46	2.546	<0.001	<0.001	Co-occurrence
	ADAM17	RET	9701	163	291	36	2.88	<0.001	<0.001	Co-occurrence
	FBXW7	RET	9369	495	273	54	1.905	<0.001	<0.001	Co-occurrence
	ADAM10	RET	9720	144	298	29	2.716	<0.001	<0.001	Co-occurrence
	MAML3	RET	9683	181	295	32	2.537	<0.001	<0.001	Co-occurrence
	NOTCH2	RET	9166	698	263	64	1.676	<0.001	<0.001	Co-occurrence
	DLL1	RET	9662	202	294	33	2.425	<0.001	<0.001	Co-occurrence
	HEY2	RET	9722	142	300	27	2.623	<0.001	<0.001	Co-occurrence
	NOTCH1	RET	9365	499	276	51	1.794	<0.001	<0.001	Co-occurrence
	NCSTN	RET	9437	427	281	46	1.855	<0.001	<0.001	Co-occurrence
	CUL1	RET	9593	271	291	36	2.131	<0.001	<0.001	Co-occurrence
	DTX4	RET	9720	144	302	25	2.482	<0.001	<0.001	Co-occurrence
	JAG2	RET	9617	247	295	32	2.078	<0.001	<0.001	Co-occurrence
	RBPJ	RET	9742	122	306	21	2.454	<0.001	<0.001	Co-occurrence
	MAML1	RET	9631	233	298	29	2.008	<0.001	<0.001	Co-occurrence
	DTX2	RET	9684	180	302	25	2.155	<0.001	<0.001	Co-occurrence
	DTX3	RET	9657	207	301	26	2.011	<0.001	<0.001	Co-occurrence
	DTX1	RET	9739	125	307	20	2.344	<0.001	<0.001	Co-occurrence
	RBPJL	RET	9635	229	300	27	1.921	<0.001	<0.001	Co-occurrence
	CIR1	RET	9736	128	307	20	2.309	<0.001	<0.001	Co-occurrence
	ITCH	RET	9567	297	296	31	1.754	<0.001	<0.001	Co-occurrence
	HDAC2	RET	9692	172	304	23	2.092	<0.001	<0.001	Co-occurrence
	DTX3L	RET	9680	184	304	23	1.993	<0.001	<0.001	Co-occurrence
	SNW1	RET	9737	127	308	19	2.242	<0.001	<0.001	Co-occurrence
	APH1B	RET	9807	57	314	13	2.833	<0.001	<0.001	Co-occurrence
	MFNG	RET	9771	93	311	16	2.434	<0.001	<0.001	Co-occurrence
	HEYL	RET	9691	173	306	21	1.943	<0.001	<0.001	Co-occurrence
	DLL3	RET	9588	276	301	26	1.585	<0.001	<0.001	Co-occurrence
	DLL4	RET	9714	150	309	18	1.915	<0.001	<0.001	Co-occurrence
	PSEN1	RET	9757	107	312	15	2.132	<0.001	<0.001	Co-occurrence
	ARRDC1	RET	9725	139	310	17	1.94	<0.001	<0.001	Co-occurrence
	CTBP2	RET	9702	162	309	18	1.803	<0.001	<0.001	Co-occurrence
	CTBP1	RET	9702	162	310	17	1.716	<0.001	<0.001	Co-occurrence
	NUMB	RET	9728	136	312	15	1.782	<0.001	<0.001	Co-occurrence
	NUMBL	RET	9688	176	310	17	1.594	<0.001	<0.001	Co-occurrence
	PSEN2	RET	9566	298	304	23	1.28	<0.001	<0.001	Co-occurrence
	HDAC1	RET	9741	123	314	13	1.713	<0.001	<0.001	Co-occurrence
	APH1A	RET	9439	425	300	27	0.999	0.001	0.002	Co-occurrence
	LFNG	RET	9669	195	313	14	1.149	0.007	0.01	Co-occurrence
	PSENEN	RET	9645	219	312	15	1.082	0.008	0.011	Co-occurrence
	HEY1	RET	9512	352	308	19	0.737	0.03	0.037	Co-occurrence
DNA Damage Response: CHEK1 CHEK2 RAD51 BRCA1 BRCA2 MLH1 MSH2 ATM ATR MDC1 PARP1 FANCF	MSH2	RET	9677	187	283	44	>3	<0.001	<0.001	Co-occurrence
	ATM	RET	9277	587	253	74	2.209	<0.001	<0.001	Co-occurrence
	ATR	RET	9382	482	261	66	2.299	<0.001	<0.001	Co-occurrence
	MDC1	RET	9548	316	273	54	2.579	<0.001	<0.001	Co-occurrence
	BRCA2	RET	9357	507	260	67	2.25	<0.001	<0.001	Co-occurrence
	BRCA1	RET	9557	307	286	41	2.158	<0.001	<0.001	Co-occurrence
	CHEK1	RET	9690	174	298	29	2.438	<0.001	<0.001	Co-occurrence
	MLH1	RET	9694	170	301	26	2.3	<0.001	<0.001	Co-occurrence
	PARP1	RET	9524	340	295	32	1.603	<0.001	<0.001	Co-occurrence
	CHEK2	RET	9666	198	304	23	1.885	<0.001	<0.001	Co-occurrence
	RAD51	RET	9747	117	312	15	2.002	<0.001	<0.001	Co-occurrence
	FANCF	RET	9787	77	316	11	2.146	<0.001	<0.001	Co-occurrence
Other growth/proliferation signaling: CSF1 CSF1R IGF1 IGF1R FGF1 FGFR1 AURKA DLEC1 PLAGL1 OPCML DPH1	DLEC1	RET	9628	236	280	47	2.776	<0.001	<0.001	Co-occurrence
	IGF1R	RET	9537	327	274	53	2.496	<0.001	<0.001	Co-occurrence
	CSF1R	RET	9669	195	288	39	2.747	<0.001	<0.001	Co-occurrence
	IGF1	RET	9788	76	304	23	>3	<0.001	<0.001	Co-occurrence
	OPCML	RET	9568	296	289	38	2.088	<0.001	<0.001	Co-occurrence
	PLAGL1	RET	9738	126	305	22	2.479	<0.001	<0.001	Co-occurrence
	FGFR1	RET	9263	601	277	50	1.476	<0.001	<0.001	Co-occurrence
	DPH1	RET	9740	124	307	20	2.355	<0.001	<0.001	Co-occurrence
	CSF1	RET	9727	137	308	19	2.131	<0.001	<0.001	Co-occurrence
	FGF1	RET	9761	103	316	11	1.722	0.001	0.001	Co-occurrence
	AURKA	RET	9650	214	314	13	0.901	0.031	0.035	Co-occurrence
Survial/cell death regulation signaling: NFKB1 NFKB2 CHUK DIRAS3 FAS HLA-G BAD BCL2 BCL2L1 APAF1 CASP9 CASP8 CASP10 CASP3 CASP6 CASP7 GSK3B ARL11 WWOX PEG3 TGFB1 TGFBR1 TGFBR2	NFKB1	RET	9758	106	291	36	>3	<0.001	<0.001	Co-occurrence
	PEG3	RET	9289	575	259	68	2.085	<0.001	<0.001	Co-occurrence
	NFKB2	RET	9748	116	296	31	>3	<0.001	<0.001	Co-occurrence
	CASP8	RET	9568	296	283	44	2.329	<0.001	<0.001	Co-occurrence
	APAF1	RET	9690	174	294	33	2.644	<0.001	<0.001	Co-occurrence
	CHUK	RET	9737	127	300	27	2.787	<0.001	<0.001	Co-occurrence
	CASP9	RET	9749	115	304	23	2.681	<0.001	<0.001	Co-occurrence
	TGFBR1	RET	9725	139	302	25	2.534	<0.001	<0.001	Co-occurrence
	GSK3B	RET	9683	181	299	28	2.325	<0.001	<0.001	Co-occurrence
	WWOX	RET	9272	592	274	53	1.599	<0.001	<0.001	Co-occurrence
	FAS	RET	9675	189	301	26	2.145	<0.001	<0.001	Co-occurrence
	CASP10	RET	9720	144	305	22	2.284	<0.001	<0.001	Co-occurrence
	DIRAS3	RET	9771	93	310	17	2.526	<0.001	<0.001	Co-occurrence
	HLA-G	RET	9717	147	306	21	2.182	<0.001	<0.001	Co-occurrence
	CASP6	RET	9809	55	314	13	2.884	<0.001	<0.001	Co-occurrence
	ARL11	RET	9652	212	304	23	1.784	<0.001	<0.001	Co-occurrence
	CASP3	RET	9645	219	305	22	1.668	<0.001	<0.001	Co-occurrence
	CASP7	RET	9765	99	313	14	2.141	<0.001	<0.001	Co-occurrence
	TGFBR2	RET	9645	219	307	20	1.521	<0.001	<0.001	Co-occurrence
	TGFB1	RET	9741	123	313	14	1.825	<0.001	<0.001	Co-occurrence
	BCL2	RET	9706	158	312	15	1.562	<0.001	<0.001	Co-occurrence
	BAD	RET	9785	79	318	9	1.81	0.002	0.003	Co-occurrence
	BCL2L1	RET	9590	274	309	18	1.028	0.006	0.008	Co-occurrence
Telomere maintenance: TERC TERT	TERT	RET	9320	544	284	43	1.375	<0.001	<0.001	Co-occurrence
RTK signaling family: EGFR ERBB2 ERBB3 ERBB4 PDGFA PDGFB PDGFRA PDGFRB KIT FGF1 FGFR1 IGF1 IGF1R VEGFA VEGFB KDR	KDR	RET	9476	388	258	69	2.707	<0.001	<0.001	Co-occurrence
	ERBB4	RET	9348	516	251	76	2.456	<0.001	<0.001	Co-occurrence
	KIT	RET	9529	335	272	55	2.524	<0.001	<0.001	Co-occurrence
	PDGFRA	RET	9488	376	270	57	2.413	<0.001	<0.001	Co-occurrence
	IGF1R	RET	9537	327	274	53	2.496	<0.001	<0.001	Co-occurrence
	PDGFRB	RET	9648	216	286	41	2.679	<0.001	<0.001	Co-occurrence
	ERBB3	RET	9511	353	281	46	2.141	<0.001	<0.001	Co-occurrence
	IGF1	RET	9788	76	304	23	>3	<0.001	<0.001	Co-occurrence
	FGFR1	RET	9263	601	277	50	1.476	<0.001	<0.001	Co-occurrence
	EGFR	RET	9187	677	274	53	1.392	<0.001	<0.001	Co-occurrence
	ERBB2	RET	9276	588	285	42	1.217	<0.001	<0.001	Co-occurrence
	PDGFA	RET	9664	200	307	20	1.654	<0.001	<0.001	Co-occurrence
	PDGFB	RET	9767	97	314	13	2.06	<0.001	<0.001	Co-occurrence
	VEGFA	RET	9625	239	306	21	1.467	<0.001	<0.001	Co-occurrence
	FGF1	RET	9761	103	316	11	1.722	0.001	0.001	Co-occurrence
	VEGFB	RET	9778	86	320	7	1.314	0.03	0.033	Co-occurrence
PI3K-AKT-mTOR signaling: PIK3CA PIK3R1 PIK3R2 PTEN PDPK1 AKT1 AKT2 FOXO1 FOXO3 MTOR RICTOR TSC1 TSC2 RHEB AKT1S1 RPTOR MLST8	TSC1	RET	9625	239	282	45	2.684	<0.001	<0.001	Co-occurrence
	RICTOR	RET	9408	456	268	59	2.183	<0.001	<0.001	Co-occurrence
	MTOR	RET	9458	406	275	52	2.139	<0.001	<0.001	Co-occurrence
	FOXO1	RET	9657	207	293	34	2.437	<0.001	<0.001	Co-occurrence
	FOXO3	RET	9660	204	297	30	2.258	<0.001	<0.001	Co-occurrence
	PIK3R1	RET	9441	423	285	42	1.718	<0.001	<0.001	Co-occurrence
	RPTOR	RET	9525	339	291	36	1.797	<0.001	<0.001	Co-occurrence
	PTEN	RET	8664	1200	248	79	1.202	<0.001	<0.001	Co-occurrence
	TSC2	RET	9562	302	294	33	1.829	<0.001	<0.001	Co-occurrence
	PIK3R2	RET	9680	184	302	25	2.123	<0.001	<0.001	Co-occurrence
	MLST8	RET	9736	128	308	19	2.23	<0.001	<0.001	Co-occurrence
	AKT2	RET	9617	247	304	23	1.559	<0.001	<0.001	Co-occurrence
	RHEB	RET	9698	166	309	18	1.767	<0.001	<0.001	Co-occurrence
	PIK3CA	RET	8069	1795	243	84	0.636	<0.001	0.001	Co-occurrence
	AKT1	RET	9642	222	311	16	1.16	0.004	0.006	Co-occurrence
	AKT1S1	RET	9780	84	320	7	1.349	0.027	0.033	Co-occurrence
Ras-Raf-MEK-Erk/JNK signaling: KRAS HRAS BRAF RAF1 MAP3K1 MAP3K2 MAP3K3 MAP3K4 MAP3K5 MAP2K1 MAP2K2 MAP2K3 MAP2K4 MAP2K5 MAPK1 MAPK3 MAPK4 MAPK6 MAPK7 MAPK8 MAPK9 MAPK12 MAPK14 DAB2 RASSF1 RAB25	MAPK8	RET	9769	95	267	60	>3	<0.001	<0.001	Co-occurrence
	MAP3K5	RET	9585	279	276	51	2.666	<0.001	<0.001	Co-occurrence
	MAP3K4	RET	9546	318	280	47	2.333	<0.001	<0.001	Co-occurrence
	MAP3K2	RET	9743	121	299	28	2.915	<0.001	<0.001	Co-occurrence
	MAP3K1	RET	9509	355	281	46	2.133	<0.001	<0.001	Co-occurrence
	DAB2	RET	9474	390	279	48	2.063	<0.001	<0.001	Co-occurrence
	MAP3K3	RET	9610	254	290	37	2.271	<0.001	<0.001	Co-occurrence
	MAPK4	RET	9672	192	295	32	2.45	<0.001	<0.001	Co-occurrence
	MAPK14	RET	9740	124	301	26	2.762	<0.001	<0.001	Co-occurrence
	MAPK6	RET	9731	133	302	25	2.599	<0.001	<0.001	Co-occurrence
	BRAF	RET	9083	781	263	64	1.501	<0.001	<0.001	Co-occurrence
	MAP2K5	RET	9768	96	307	20	2.729	<0.001	<0.001	Co-occurrence
	MAP2K3	RET	9635	229	298	29	2.034	<0.001	<0.001	Co-occurrence
	RAF1	RET	9653	211	301	26	1.982	<0.001	<0.001	Co-occurrence
	MAPK7	RET	9662	202	303	24	1.922	<0.001	<0.001	Co-occurrence
	MAP2K2	RET	9705	159	306	21	2.067	<0.001	<0.001	Co-occurrence
	MAP2K1	RET	9753	111	311	16	2.176	<0.001	<0.001	Co-occurrence
	MAP2K4	RET	9589	275	301	26	1.591	<0.001	<0.001	Co-occurrence
	MAPK9	RET	9676	188	307	20	1.745	<0.001	<0.001	Co-occurrence
	KRAS	RET	8945	919	275	52	0.88	<0.001	<0.001	Co-occurrence
	RASSF1	RET	9757	107	315	12	1.797	<0.001	<0.001	Co-occurrence
	RAB25	RET	9489	375	301	26	1.128	<0.001	<0.001	Co-occurrence
	MAPK12	RET	9634	230	312	15	1.01	0.013	0.017	Co-occurrence
	MAPK1	RET	9674	190	314	13	1.076	0.014	0.018	Co-occurrence
	MAPK3	RET	9725	139	317	10	1.142	0.022	0.027	Co-occurrence
Regulation of ribosomal protein synthesis and cell growth: RPS6KA1 RPS6KA2 RPS6KB1 RPS6KB2 EIF5A2 EIF4E EIF4EBP1 RPS6 HIF1A	RPS6KA2	RET	9618	246	285	42	2.527	<0.001	<0.001	Co-occurrence
	HIF1A	RET	9745	119	301	26	2.822	<0.001	<0.001	Co-occurrence
	EIF4E	RET	9815	49	314	13	>3	<0.001	<0.001	Co-occurrence
	RPS6KA1	RET	9723	141	307	20	2.167	<0.001	<0.001	Co-occurrence
	RPS6	RET	9740	124	309	18	2.194	<0.001	<0.001	Co-occurrence
	RPS6KB1	RET	9600	264	305	22	1.391	<0.001	<0.001	Co-occurrence
	RPS6KB2	RET	9601	263	306	21	1.325	<0.001	<0.001	Co-occurrence
Angiogenesis: VEGFA VEGFB KDR CXCL8 CXCR1 CXCR2	KDR	RET	9476	388	258	69	2.707	<0.001	<0.001	Co-occurrence
	CXCR1	RET	9736	128	308	19	2.23	<0.001	<0.001	Co-occurrence
	CXCR2	RET	9731	133	308	19	2.174	<0.001	<0.001	Co-occurrence
	VEGFA	RET	9625	239	306	21	1.467	<0.001	<0.001	Co-occurrence
	CXCL8	RET	9749	115	314	13	1.811	<0.001	<0.001	Co-occurrence
	VEGFB	RET	9778	86	320	7	1.314	0.03	0.042	Co-occurrence
Folate transport: SLC19A1 FOLR1 FOLR2 FOLR3 IZUMO1R	FOLR3	RET	9609	255	299	28	1.819	<0.001	<0.001	Co-occurrence
	SLC19A1	RET	9710	154	307	20	2.038	<0.001	<0.001	Co-occurrence
	FOLR1	RET	9620	244	308	19	1.282	<0.001	0.001	Co-occurrence
	IZUMO1R	RET	9720	144	315	12	1.363	0.004	0.007	Co-occurrence
	FOLR2	RET	9630	234	313	14	0.88	0.029	0.036	Co-occurrence
Invasion and metastasis: MMP1 MMP2 MMP3 MMP7 MMP9 MMP10 MMP11 MMP12 MMP13 MMP14 MMP15 MMP16 MMP17 MMP19 MMP21 MMP23B MMP24 MMP25 MMP26 MMP27 MMP28 ITGB3 ITGAV PTK2 CDH1 SPARC WFDC2	MMP10	RET	9608	256	285	42	2.468	<0.001	<0.001	Co-occurrence
	MMP19	RET	9727	137	297	30	2.842	<0.001	<0.001	Co-occurrence
	ITGB3	RET	9685	179	294	33	2.602	<0.001	<0.001	Co-occurrence
	MMP17	RET	9725	139	299	28	2.712	<0.001	<0.001	Co-occurrence
	ITGAV	RET	9601	263	290	37	2.22	<0.001	<0.001	Co-occurrence
	MMP15	RET	9744	120	303	24	2.685	<0.001	<0.001	Co-occurrence
	MMP2	RET	9691	173	299	28	2.391	<0.001	<0.001	Co-occurrence
	MMP26	RET	9749	115	305	22	2.612	<0.001	<0.001	Co-occurrence
	MMP13	RET	9609	255	295	32	2.031	<0.001	<0.001	Co-occurrence
	PTK2	RET	9139	725	269	58	1.443	<0.001	<0.001	Co-occurrence
	MMP9	RET	9599	265	295	32	1.974	<0.001	<0.001	Co-occurrence
	MMP16	RET	9335	529	280	47	1.567	<0.001	<0.001	Co-occurrence
	MMP1	RET	9635	229	298	29	2.034	<0.001	<0.001	Co-occurrence
	MMP3	RET	9603	261	297	30	1.894	<0.001	<0.001	Co-occurrence
	CDH1	RET	9497	367	291	36	1.679	<0.001	<0.001	Co-occurrence
	MMP14	RET	9701	163	304	23	2.171	<0.001	<0.001	Co-occurrence
	MMP7	RET	9639	225	300	27	1.947	<0.001	<0.001	Co-occurrence
	MMP21	RET	9728	136	307	20	2.22	<0.001	<0.001	Co-occurrence
	SPARC	RET	9730	134	308	19	2.163	<0.001	<0.001	Co-occurrence
	MMP27	RET	9602	262	302	25	1.601	<0.001	<0.001	Co-occurrence
	MMP24	RET	9648	216	307	20	1.541	<0.001	<0.001	Co-occurrence
	MMP25	RET	9722	142	312	15	1.719	<0.001	<0.001	Co-occurrence
	MMP28	RET	9762	102	315	12	1.866	<0.001	<0.001	Co-occurrence
	MMP11	RET	9732	132	315	12	1.49	0.002	0.003	Co-occurrence
	MMP12	RET	9689	175	313	14	1.308	0.003	0.005	Co-occurrence
TGF-β pathway: TGFB1 TGFB2 TGFB3 TGFBR1 TGFBR2 TGFBR3 BMP2 BMP3 BMP4 BMP5 BMP6 BMP7 GDF2 BMP10 BMP15 BMPR1A BMPR1B BMPR2 ACVR1 ACVR1B ACVR1C ACVR2A ACVR2B ACVRL1 Nodal GDF1 GDF11 INHA INHBA INHBB INHBC INHBE SMAD2 SMAD3 SMAD1 SMAD5 SMAD4 SMAD9 SMAD6 SMAD7 SPTBN1 TGFBRAP1 ZFYVE9	GDF2	RET	9734	130	257	70	>3	<0.001	<0.001	Co-occurrence
	SPTBN1	RET	9549	315	274	53	2.552	<0.001	<0.001	Co-occurrence
	BMPR2	RET	9636	228	283	44	2.716	<0.001	<0.001	Co-occurrence
	ZFYVE9	RET	9659	205	285	42	2.796	<0.001	<0.001	Co-occurrence
	BMP2	RET	9742	122	293	34	>3	<0.001	<0.001	Co-occurrence
	INHBA	RET	9680	184	292	35	2.657	<0.001	<0.001	Co-occurrence
	BMP3	RET	9727	137	297	30	2.842	<0.001	<0.001	Co-occurrence
	ACVR2A	RET	9618	246	288	39	2.404	<0.001	<0.001	Co-occurrence
	ACVR1C	RET	9741	123	299	28	2.891	<0.001	<0.001	Co-occurrence
	ACVR1B	RET	9696	168	295	32	2.646	<0.001	<0.001	Co-occurrence
	BMPR1A	RET	9704	160	296	31	2.667	<0.001	<0.001	Co-occurrence
	BMP5	RET	9615	249	289	38	2.344	<0.001	<0.001	Co-occurrence
	TGFBR3	RET	9678	186	294	33	2.546	<0.001	<0.001	Co-occurrence
	BMP10	RET	9755	109	302	25	2.889	<0.001	<0.001	Co-occurrence
	INHBC	RET	9722	142	300	27	2.623	<0.001	<0.001	Co-occurrence
	NODAL	RET	9785	79	307	20	>3	<0.001	<0.001	Co-occurrence
	TGFBR1	RET	9725	139	302	25	2.534	<0.001	<0.001	Co-occurrence
	TGFBRAP1	RET	9710	154	301	26	2.445	<0.001	<0.001	Co-occurrence
	SMAD5	RET	9763	101	306	21	2.73	<0.001	<0.001	Co-occurrence
	ACVRL1	RET	9721	143	303	24	2.429	<0.001	<0.001	Co-occurrence
	BMP15	RET	9670	194	300	27	2.165	<0.001	<0.001	Co-occurrence
	BMP4	RET	9746	118	307	20	2.428	<0.001	<0.001	Co-occurrence
	SMAD2	RET	9676	188	302	25	2.091	<0.001	<0.001	Co-occurrence
	BMPR1B	RET	9742	122	307	20	2.379	<0.001	<0.001	Co-occurrence
	TGFB3	RET	9774	90	310	17	2.574	<0.001	<0.001	Co-occurrence
	BMP6	RET	9642	222	301	26	1.908	<0.001	<0.001	Co-occurrence
	SMAD4	RET	9458	406	291	36	1.527	<0.001	<0.001	Co-occurrence
	ACVR2B	RET	9745	119	309	18	2.254	<0.001	<0.001	Co-occurrence
	TGFB2	RET	9607	257	300	27	1.75	<0.001	<0.001	Co-occurrence
	SMAD9	RET	9659	205	304	23	1.834	<0.001	<0.001	Co-occurrence
	INHBB	RET	9759	105	311	16	2.258	<0.001	<0.001	Co-occurrence
	SMAD3	RET	9711	153	308	19	1.969	<0.001	<0.001	Co-occurrence
	INHBE	RET	9719	145	309	18	1.965	<0.001	<0.001	Co-occurrence
	SMAD7	RET	9736	128	311	16	1.968	<0.001	<0.001	Co-occurrence
	ACVR1	RET	9726	138	311	16	1.858	<0.001	<0.001	Co-occurrence
	SMAD1	RET	9747	117	313	14	1.898	<0.001	<0.001	Co-occurrence
	TGFBR2	RET	9645	219	307	20	1.521	<0.001	<0.001	Co-occurrence
	TGFB1	RET	9741	123	313	14	1.825	<0.001	<0.001	Co-occurrence
	GDF11	RET	9768	96	315	12	1.955	<0.001	<0.001	Co-occurrence
	BMP7	RET	9568	296	304	23	1.29	<0.001	<0.001	Co-occurrence
	INHA	RET	9748	116	314	13	1.799	<0.001	<0.001	Co-occurrence
	SMAD6	RET	9791	73	319	8	1.75	0.004	0.005	Co-occurrence
	GDF1	RET	9854	10	324	3	>3	0.007	0.009	Co-occurrence
